# Supplementary material for: Room temperature stable E,Z-diphosphenes: their isomerization, coordination, and cycloaddition chemistry
Source: Royal Society of Chemistry journal article supplement (doi:10.1039/d3sc04506d), 2023-01-01
Supplement: d3sc04506d1.pdf [file d3sc04506d1.pdf]

# Supporting Information

## S1: Synthetic details

## S2: UV-Vis spectral studies

## S3: Kinetic and thermodynamic studies

## S4: X-Ray diffraction studies

## S5: Theoretical details

## S6: References

### S1: Synthetic details

**General:** All manipulations were performed under an inert atmosphere of dry nitrogen, using standard Schlenk techniques. Dry, oxygen-free solvents were employed unless otherwise mentioned. The compounds  $L=CH_2$  ( $L = 1,3$ -Bis(2,6-diisopropylphenyl)imidazolidin-2-ylidene),  $[(LCH_2)TMS](OTf)$  (**S4**), was prepared following reported procedure,<sup>[1]</sup> while all other starting materials were purchased from commercial sources. NMR spectra were recorded on Bruker Avance 400 MHz spectrometers ( $^1H$ , 400.1 MHz;  $^{13}C$ , 100.5 MHz;  $^{31}P$ , 161.9 MHz) or Bruker Avance 600 MHz spectrometers ( $^1H$ , 600.2 MHz;  $^{13}C$ , 150.8 MHz;  $^{31}P$ , 242.9 MHz). The chemical shifts ( $\delta$ ) were measured according to IUPAC and expressed in ppm relative to  $SiMe_4$  ( $^1H$ ,  $^{13}C$ ), and 85%  $H_3PO_4$  ( $^{31}P$ ). Coupling constants  $J$  are reported in Hertz [Hz] as absolute values. The high purity of these isolated compounds has been proved mainly by NMR. ESI-MS spectra were measured on Bruker ESI-Q-TOF maxis 4G. UV/vis spectra were measured on Shimadzu UV/vis/NIR UV-3600-spectrometer. Melting point (M. P.) were measured on Jiahang JH30 apparatus.

### Synthesis of $[\text{LCH}_2(\text{CH}_3)](\text{OTf})$ (**S1**):

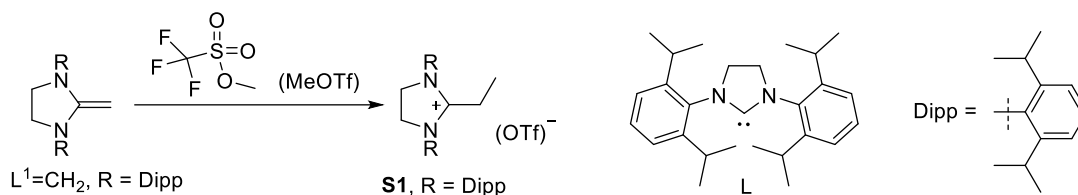

Methyl trifluoromethanesulfonate (MeOTf) (1.81 mg, 11 mmol) in toluene (10 mL) was added dropwise to a stirred solution of  $\text{L}=\text{CH}_2$  (4.04 g, 10 mmol) in toluene (60 mL) at room temperature. After stirring for 1.0 hour, the resulting precipitates were collected via filtration, washed with hexane ( $3 \times 4.0$  mL) and then dried *in vacuo* affording  $[\text{LCH}_2(\text{CH}_3)](\text{OTf})$  (**S1**) as a white solid (5.45 g, 96 %). M. P.  $> 250$  °C.  $^1\text{H}$  NMR (400.1 MHz,  $\text{CD}_3\text{CN}$ ):  $\delta = 7.58$  (t,  $J = 7.8$  Hz, 2 H,  $\text{C}_{\text{ar}}\text{H}$ ), 7.44 (d,  $J = 7.8$  Hz, 4 H,  $\text{C}_{\text{ar}}\text{H}$ ), 4.32 (s, 4 H, NCH), 3.00 (m, 4 H,  $\text{CH}(\text{CH}_3)_2$ ), 2.14 (m,  $J = 7.64$  Hz, 2 H,  $\text{CH}_2\text{CH}_3$ ), 1.33 (d,  $J = 4.76$  Hz, 12 H,  $\text{CH}(\text{CH}_3)_2$ ), 1.32 (d,  $J = 4.8$  Hz, 12 H,  $\text{CH}(\text{CH}_3)_2$ ), 0.76 (t,  $J = 7.64$  Hz, 3 H,  $\text{CH}_2\text{CH}_3$ ).  $^{13}\text{C}\{^1\text{H}\}$  NMR (150.8 MHz,  $\text{CD}_3\text{CN}$ ):  $\delta = 172.40$  (NCN), 147.36 ( $\text{C}_{\text{Ar}}$ ), 132.56 ( $\text{C}_{\text{Ar}}$ ), 130.63 ( $\text{C}_{\text{Ar}}$ ), 126.64 ( $\text{CF}_3$ ), 53.52 (NCH), 29.77, 26.13, 23.65, 20.16, 9.28. HRMS (ESI,  $m/z$ ): calc. for:  $\text{C}_{29}\text{H}_{43}\text{N}_2^+$ : 419.3421 ( $\text{M}^+$ ), found: 419.3381.

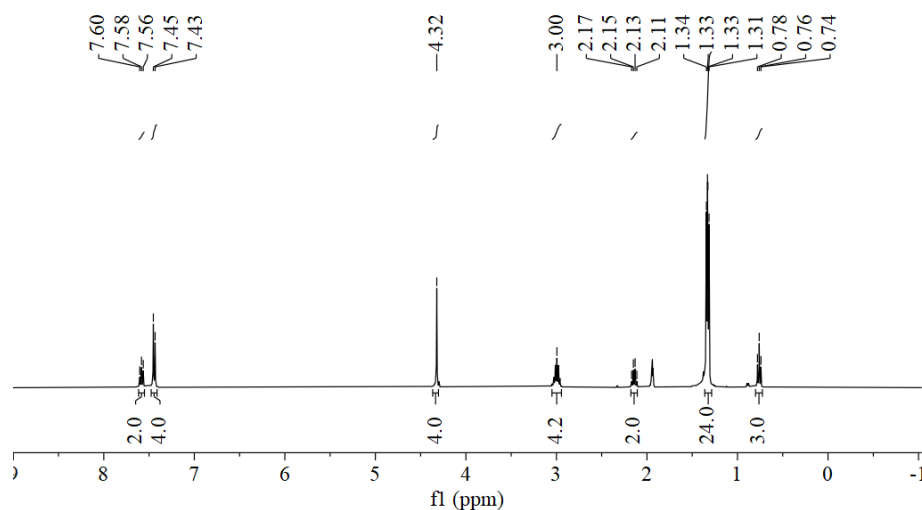

**Figure S1.**  $^1\text{H}$  NMR of **S1** in  $\text{CD}_3\text{CN}$ .

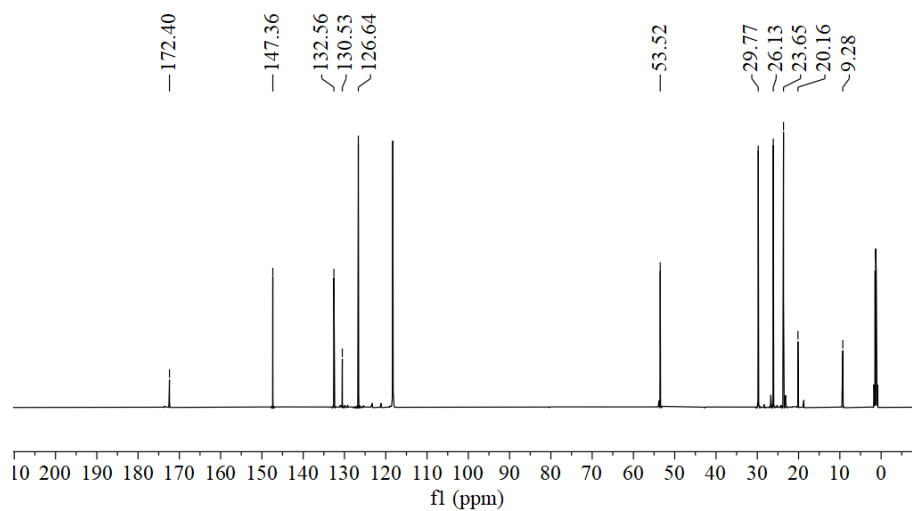

**Figure S2.**  $^{13}\text{C}\{^1\text{H}\}$  NMR of **S1** in  $\text{CD}_3\text{CN}$ .

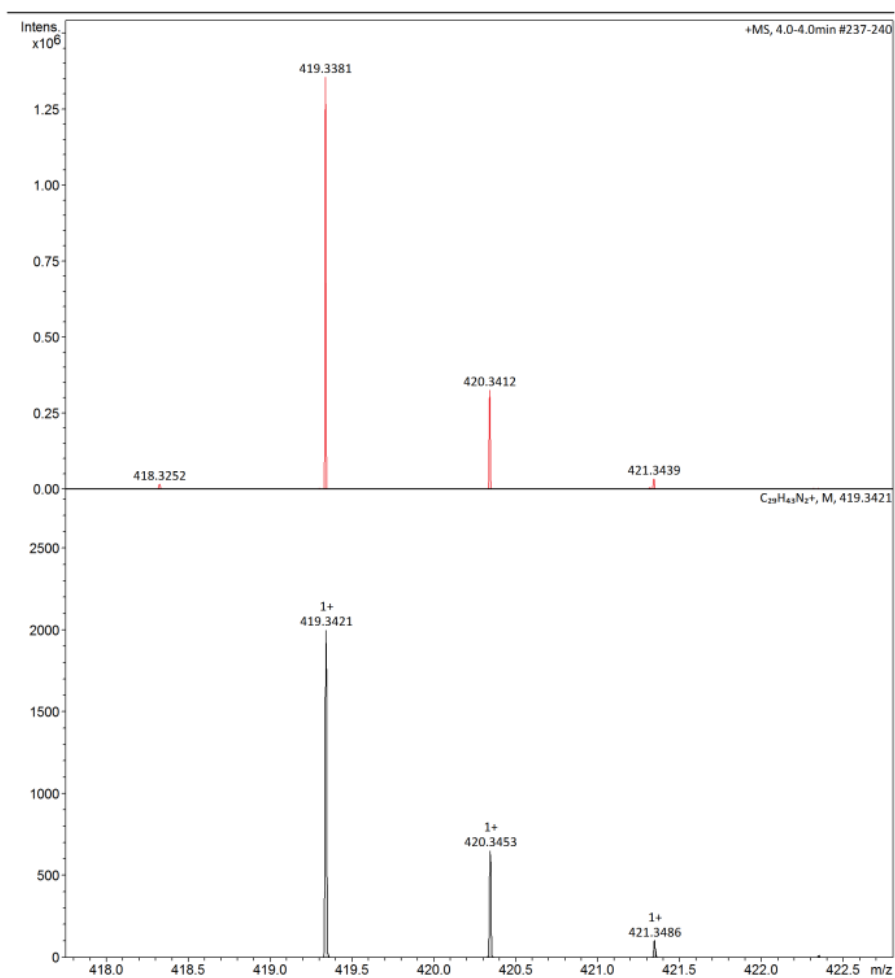

**Figure S3.** HRMS of **S1**.

### Synthesis of $L=CH(CH_3)$ (**S2**):

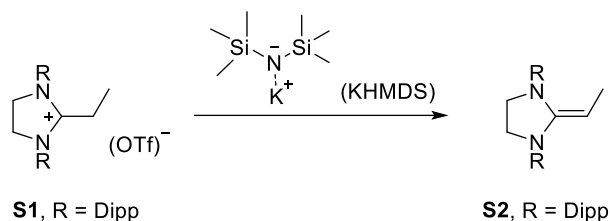

Potassium bis(trimethylsilyl)amide (KHMDS) (20 mL, 0.5 M in toluene) was added dropwise to a solution of **S1** (5.68 g, 10 mmol) in toluene (30 mL) at  $-80\text{ }^\circ\text{C}$ . The mixture was allowed to slowly warm to room temperature and stirred for another 24 h. Then, the volatiles were removed under reduced pressure, and the residue was dissolved in hexane (30 mL). After filtered through a plug of Celite, followed by solvent removing under reduced pressure, the remaining solid was washed with acetonitrile and dried in *vacuo* to afford  $L=CH(CH_3)$  (**S2**) (2.61 g, 62 %) as a white solid. M. P. =  $109.9\text{ }^\circ\text{C}$ .  $^1\text{H}$  NMR (400.1 MHz,  $\text{C}_6\text{D}_6$ ):  $\delta$  = 7.21 (m, 4 H,  $C_{Ar}H$ ), 7.10 (d,  $J$  = 7.7 Hz, 2 H,  $C_{Ar}H$ ), 3.56 (m, 4 H,  $CH(CH_3)_2$ ), 3.42 (s, 4 H, NCH), 3.42 (m, 4 H,  $CH(CH_3)_2$ ), 2.73 (q,  $J$  = 7.1 Hz, 1 H,  $CH-CH_3$ ), 1.34 (dd,  $J$  = 4.8 Hz, 12 H,  $CH(CH_3)_2$ ), 1.28 (dd,  $J$  = 5.2 Hz, 12 H,  $CH(CH_3)_2$ ), 1.10 (d,  $J$  = 7.1 Hz, 3 H,  $CH-CH_3$ ).  $^{13}\text{C}\{^1\text{H}\}$  NMR (150.8 MHz,  $\text{C}_6\text{D}_6$ ):  $\delta$  = 149.58 ( $C_{Ar}$ ), 149.34 (NCN), 148.64 ( $C_{Ar}$ ), 139.85 ( $C_{Ar}$ ), 138.25 ( $C_{Ar}$ ), 128.28 ( $C_{Ar}$ ), 128.16 ( $C_{Ar}$ ), 124.64 ( $C_{Ar}$ ), 124.30 ( $C_{Ar}$ ), 64.00 (NCH), 52.37, 50.58, 28.73, 28.57, 25.02, 24.59, 24.50, 23.71, 10.10. HRMS (ESI,  $m/z$ ): calc. for:  $\text{C}_{29}\text{H}_{43}\text{N}_2$ : 419.3421 [(M + H) $^+$ ]; found: 419.3423.

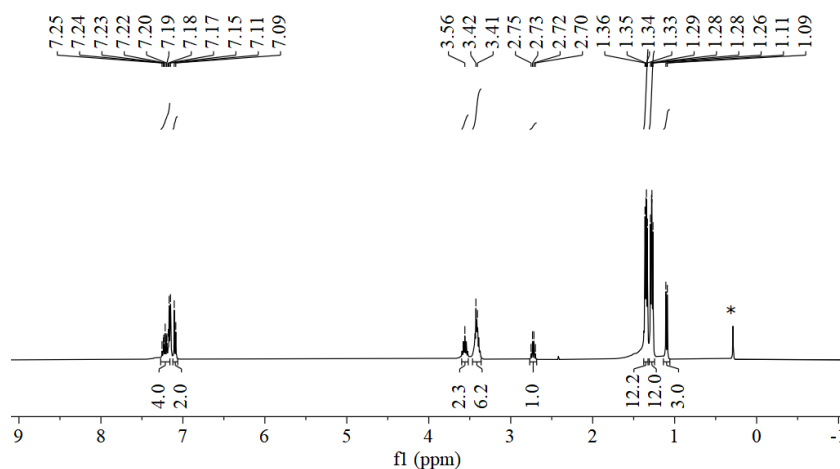

**Figure S4.**  $^1\text{H}$  NMR of **S2** in  $\text{C}_6\text{D}_6$ . \* silicone grease.

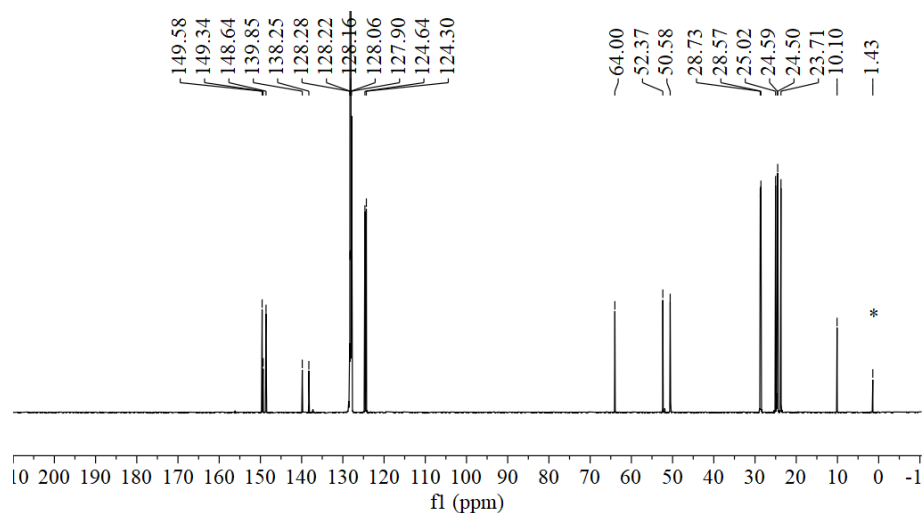

**Figure S5.**  $^{13}\text{C}\{^1\text{H}\}$  NMR of **S2** in  $\text{C}_6\text{D}_6$ . \* silicone grease.

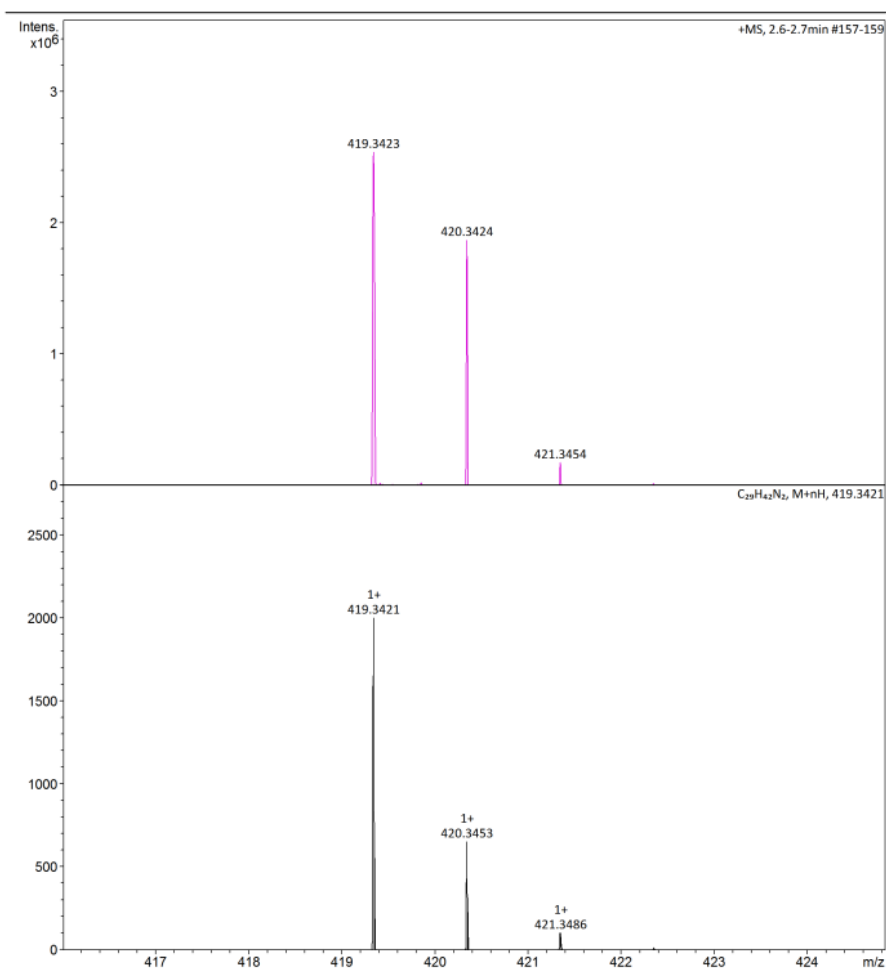

**Figure S6.** HRMS of **S2**.

### Synthesis of $[L=C(CH_3)]PCl_2$ (**1a**):

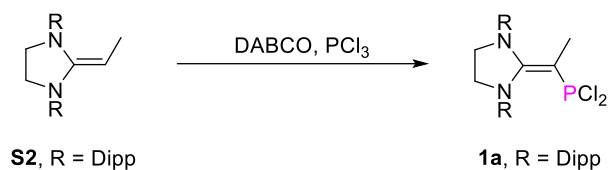

$PCl_3$  (1.6 g, 12 mmol) in toluene (3 mL) was added to a mixture of **S2** (4.18 g, 10.0 mmol) and DABCO (1.2 g, 11 mmol) in toluene (30 mL) at room temperature. After stirring for 2 hours, the resulting suspension was filtered and the filtrate was dried under reduced pressure. The remaining solid was washed with hexane and dried *in vacuo* to afford  $[L=C(CH_3)]PCl_2$  (**1a**) (4.21 g, 81 %) as a white solid. M. P. = 150.1 °C (Decomposition).  $^1H$  NMR (400.1 MHz,  $C_6D_6$ ):  $\delta$  = 7.21 (t,  $J$  = 5.1 Hz, 1 H,  $C_{Ar}H$ ), 7.14 (t,  $J$  = 5.1 Hz, 1 H,  $C_{Ar}H$ ), 7.09 (d,  $J$  = 5.1 Hz, 2 H,  $C_{Ar}H$ ), 7.00 (d,  $J$  = 5.1 Hz, 2 H,  $C_{Ar}H$ ), 3.38 (s, 4 H,  $NCH_2$ ), 3.27 (m, 4 H,  $CH(CH_3)_2$ ), 1.65 (s, 3 H,  $CH-PCl_2$ ), 1.40 (d,  $J$  = 4.6 Hz, 6 H,  $CH(CH_3)_2$ ), 1.30 (d,  $J$  = 4.6 Hz, 6 H,  $CH(CH_3)_2$ ), 1.15 (d,  $J$  = 4.6 Hz, 6 H,  $CH(CH_3)_2$ ), 1.13 (d,  $J$  = 4.6 Hz, 6 H,  $CH(CH_3)_2$ ).  $^{13}C\{^1H\}$  NMR (150.8 MHz,  $C_6D_6$ ):  $\delta$  = 160.80 (d,  $^2J_{PC}$  = 38 Hz, NCN), 146.99 ( $C_{Ar}$ ), 146.96 ( $C_{Ar}$ ), 146.85 ( $C_{Ar}$ ), 139.37 ( $C_{Ar}$ ), 139.32 ( $C_{Ar}$ ), 136.89 ( $C_{Ar}$ ), 129.01 ( $C_{Ar}$ ), 128.90 ( $C_{Ar}$ ), 127.96 ( $C_{Ar}$ ), 124.96 ( $C_{Ar}$ ), 124.78 ( $C_{Ar}$ ), 124.22 ( $C_{Ar}$ ), 76.75 (d,  $^1J_{PC}$  = 48.5 Hz, C- $PCl_2$ ), 51.84 ( $NCH_2$ ), 51.41 ( $NCH_2$ ), 28.88, 28.86, 28.48, 25.49, 25.33, 22.77, 22.14, 22.11, 11.60.  $^{31}P\{^1H\}$  NMR (242.9 MHz,  $C_6D_6$ ):  $\delta$  = 191.94. HRMS (ESI, m/z) calc. for:  $C_{29}H_{43}N_2$ : 419.3421 [(M + H) $^+$ ]; found: 419.3825.

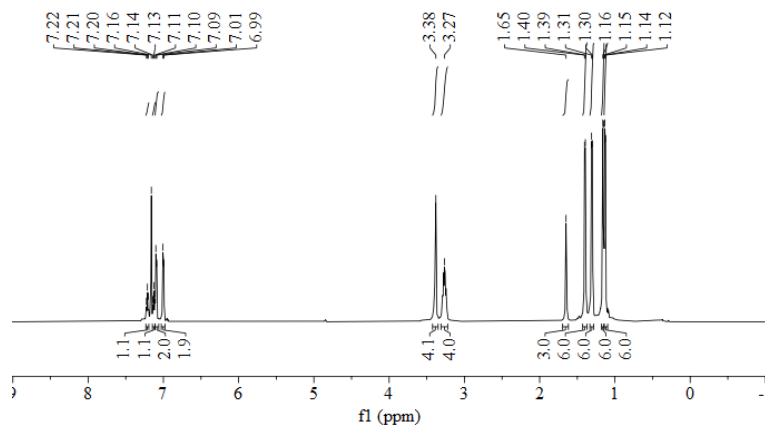

**Figure S7.**  $^1H$  NMR of **1a** in  $C_6D_6$ .

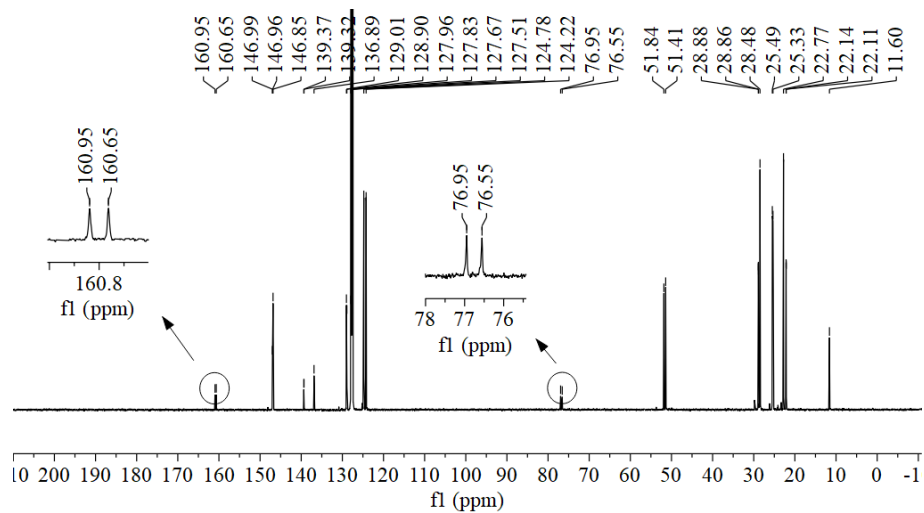

**Figure S8.**  $^{13}\text{C}\{^1\text{H}\}$  NMR of **1a** in  $\text{C}_6\text{D}_6$ .

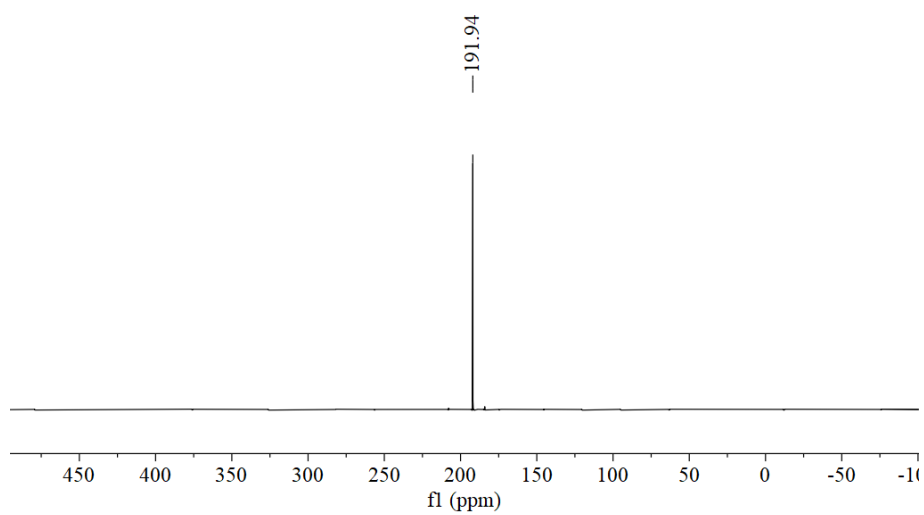

**Figure S9.**  $^{31}\text{P}\{^1\text{H}\}$  NMR of **1a** in  $\text{C}_6\text{D}_6$ .

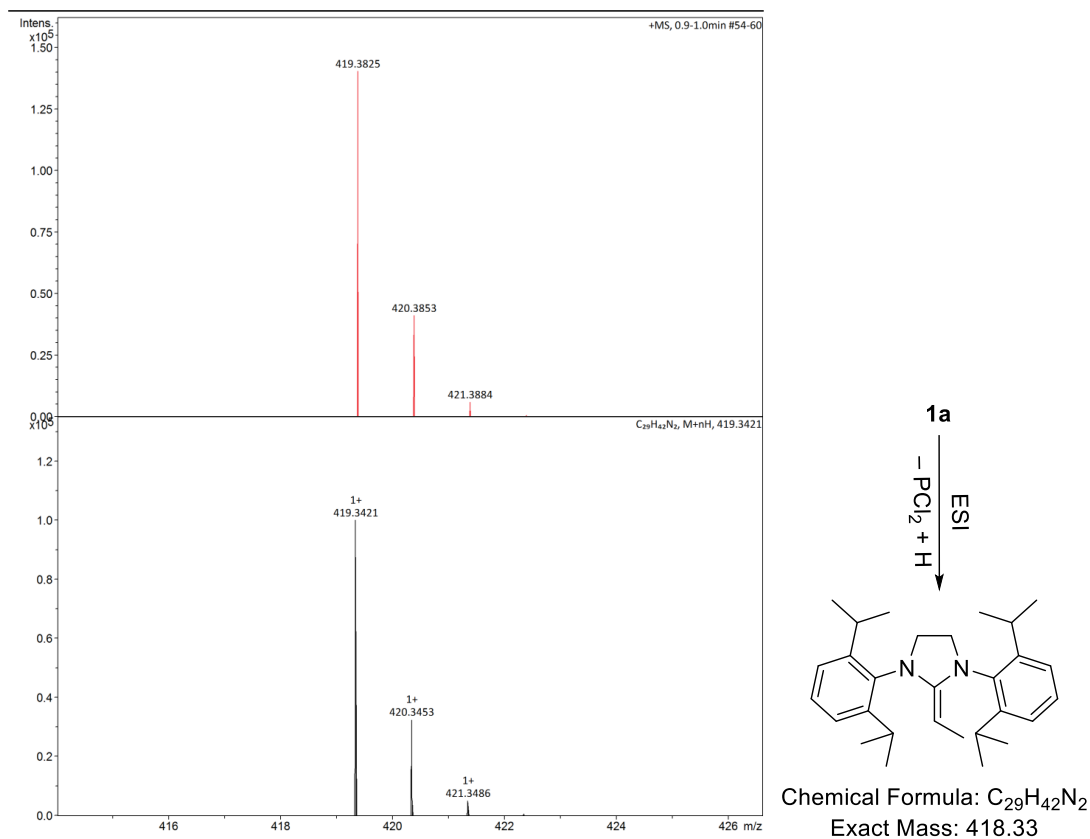

**Figure S10:** HRMS of **1a**.

### Synthesis of *E*-2a:

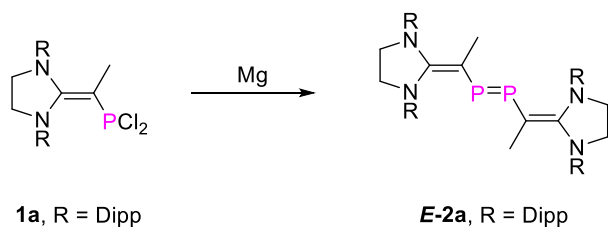

Mg powder (2.4 g, 100 mmol) was added to a solution of **1a** (5.2 g, 10 mmol) in 40 mL THF at room temperature. The resulting suspension was stirred overnight, and the solvent was removed under reduced pressure. The residue was extracted with toluene and washed with a minimum amount of *n*-pentane to afford *E*-**2a** (3.5 g, 78 %) as a red powder. Red crystals of *E*-**2a** were obtained from a saturated *n*-pentane solution stored at -30 °C for 4 days. M.P. = 250.3 °C. <sup>1</sup>H NMR (400.1 MHz, C<sub>6</sub>D<sub>6</sub>): δ = 7.13 ~ 6.98 (m, 12 H, C<sub>Ar</sub>H), 3.51 ~ 3.38 (m, 12 H, NCH<sub>2</sub> & CH(CH<sub>3</sub>)<sub>2</sub>), 1.85 (s, 6 H, PC(CH<sub>3</sub>)<sub>3</sub>), 1.29 ~ 1.17 (m, 48 H, CH(CH<sub>3</sub>)<sub>2</sub>). <sup>13</sup>C{<sup>1</sup>H} NMR (100.5 MHz, C<sub>6</sub>D<sub>6</sub>): δ = 156.33 (t, <sup>2</sup>J<sub>PC</sub> = 18.0 Hz, NCN), 147.05 (C<sub>Ar</sub>), 147.02 (C<sub>Ar</sub>), 141.68 (C<sub>Ar</sub>), 140.72 (C<sub>Ar</sub>), 127.60



( $C_{Ar}$ ), 124.61 ( $C_{Ar}$ ), 124.38 ( $C_{Ar}$ ), 91.90 (t,  $^1J_{PC} = 16.53$  Hz, CP), 52.79, 52.71 (NCH<sub>2</sub>), 29.00, 28.75, 25.59, 23.65, 21.80 (t,  $^2J_{PC} = 11.0$  Hz, CH<sub>3</sub>CP).  $^{31}P\{^1H\}$  NMR (161.9 MHz, C<sub>6</sub>D<sub>6</sub>):  $\delta = 382.63$ . UV/Vis (Tol,  $\lambda$  (nm)  $\epsilon$  (M<sup>-1</sup>cm<sup>-1</sup>)): 518 (17539.8); 416 (2483.4). HRMS (ESI, m/z) calc. for: C<sub>58</sub>H<sub>83</sub>N<sub>4</sub>P<sub>2</sub>: 897.6087 [(M + H)<sup>+</sup>]; found: 897.6063.

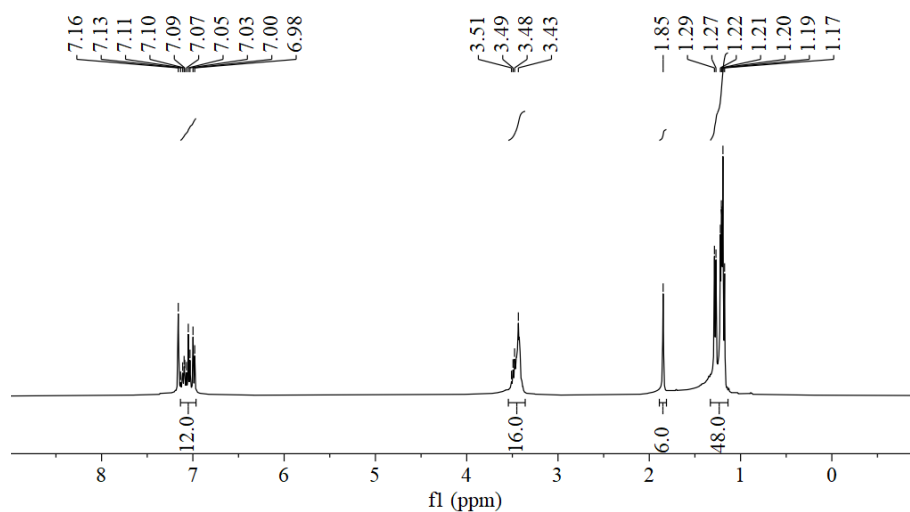

**Figure S11.**  $^1H$  NMR of *E-2a* in C<sub>6</sub>D<sub>6</sub>.

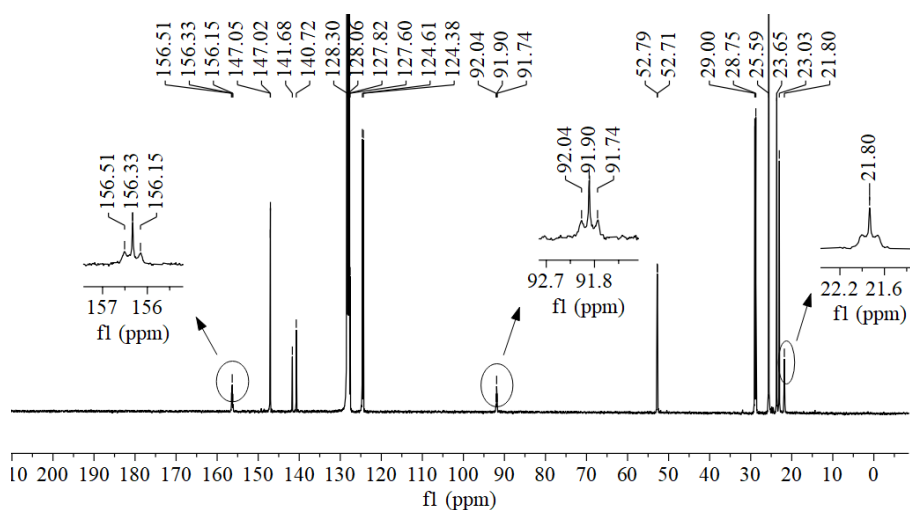

**Figure S12.**  $^{13}C\{^1H\}$  NMR of *E-2a* in C<sub>6</sub>D<sub>6</sub>.

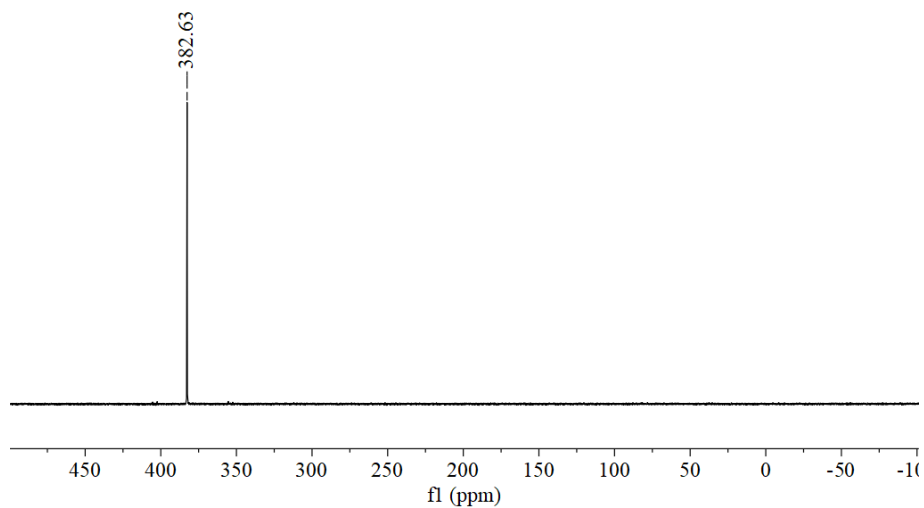

**Figure S13.**  $^{31}\text{P}\{^1\text{H}\}$  NMR of *E-2a* in  $\text{C}_6\text{D}_6$ .

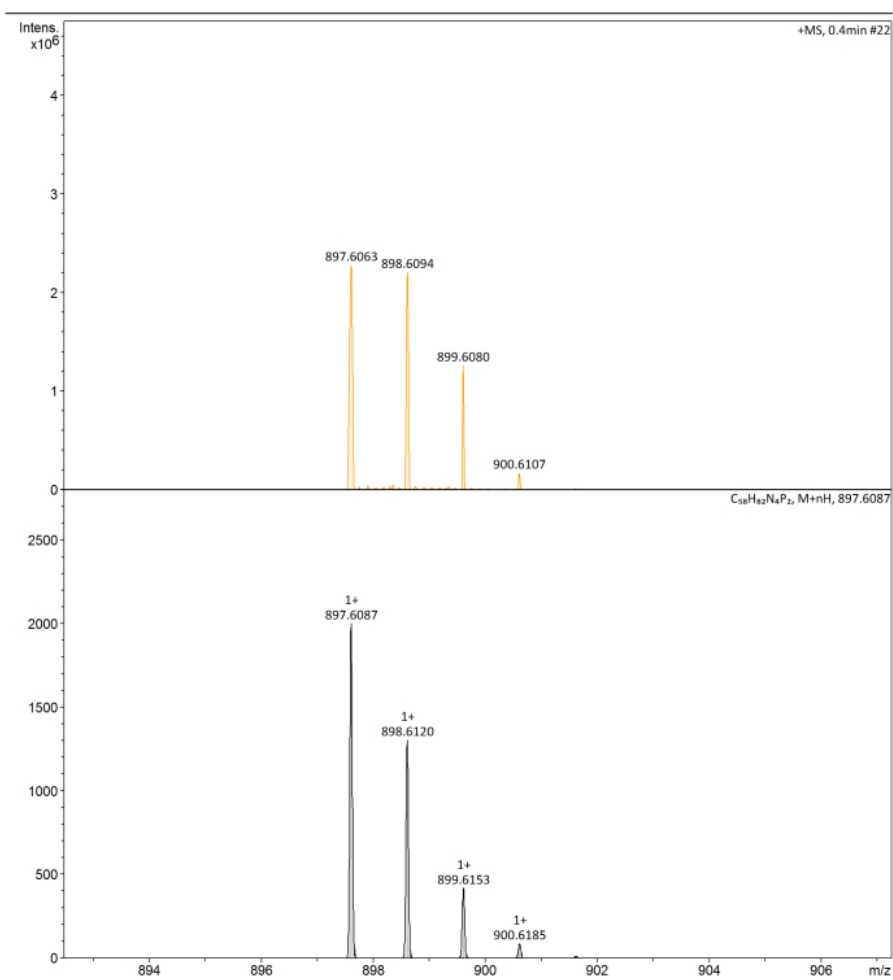

**Figure S14.** HRMS of *E-2a*.

### Synthesis of [(LCH<sub>2</sub>)TMS](OTf) (S3):

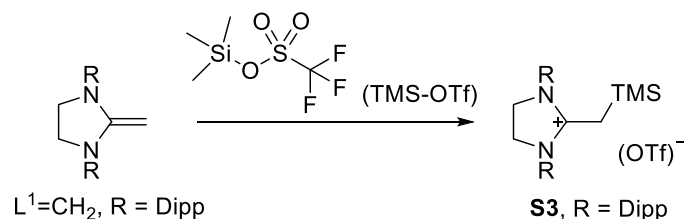

Trimethylsilyl trifluoromethanesulfonate [(TMS)(OTf)] (2.22 g, 10 mmol) in toluene (10 mL) was added dropwise to a solution of L=CH<sub>2</sub> (4.04 g, 10 mmol) in toluene (30 mL). After stirring for 1 h, the precipitate was collected via filtration, washed with hexane and dried *in vacuo* to afford [(LCH<sub>2</sub>)TMS](OTf) (**S3**) (6.00 g, 95.7 %) as white powder. M. P. = 201.7 °C. <sup>1</sup>H NMR (600.2 MHz, C<sub>6</sub>D<sub>6</sub>): δ = 7.58 (t, *J* = 7.9 Hz, 2 H, C<sub>Ar</sub>H), 7.46 (d, *J* = 7.9 Hz, 4 H, C<sub>Ar</sub>H), 4.34 (s, 4 H, NCH<sub>2</sub>), 3.09 (m, 4 H, CH(CH<sub>3</sub>)<sub>2</sub>), 1.83 (s, 2 H, C-CH<sub>2</sub>), 1.39 (d, *J* = 6.8 Hz, 12 H, CH(CH<sub>3</sub>)<sub>2</sub>), 1.31 (d, *J* = 6.8 Hz, 12 H, CH(CH<sub>3</sub>)<sub>2</sub>), -0.20 (s, 9 H, Si(CH<sub>3</sub>)<sub>3</sub>). <sup>13</sup>C{<sup>1</sup>H} NMR (150.8 MHz, C<sub>6</sub>D<sub>6</sub>): δ = 173.26 (NCN), 147.52 (C<sub>Ar</sub>), 132.45 (C<sub>Ar</sub>), 131.65 (C<sub>Ar</sub>), 126.80 (CF<sub>3</sub>), 53.35 (NCH), 29.74, 26.78, 23.59, 18.86, -0.12 (SiC). HRMS (ESI, *m/z*) calc. for: C<sub>28</sub>H<sub>41</sub>N<sub>2</sub>: 405.3264 [(M + H)]<sup>+</sup>; found: 405.3246.

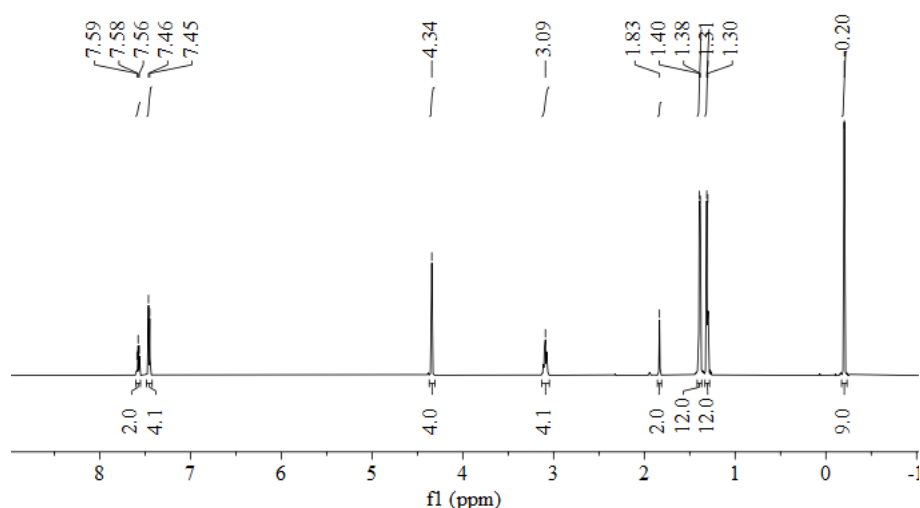

**Figure S15.** <sup>1</sup>H NMR spectrum of **S3** in CD<sub>3</sub>CN.

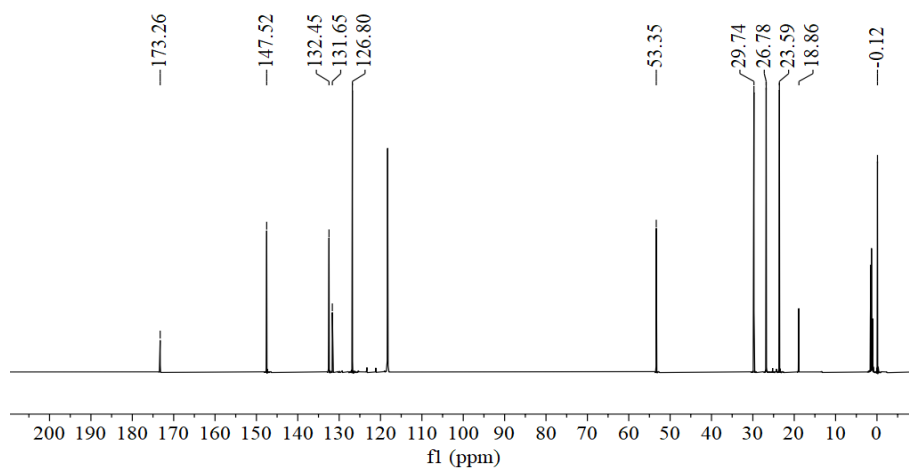

**Figure S16.**  $^{13}\text{C}\{^1\text{H}\}$  NMR spectrum of **S3** in  $\text{CD}_3\text{CN}$ .

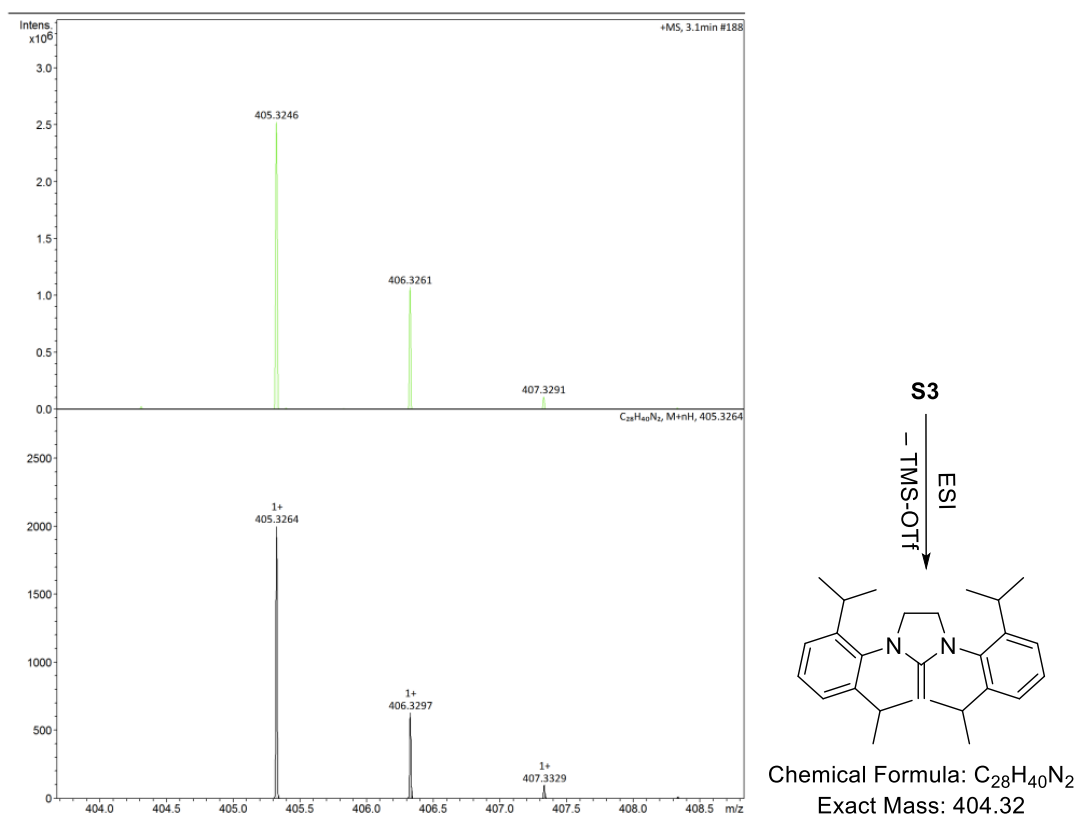

**Figure S17.** HRMS of **S3**.

**Synthesis of (L=CH)TMS (S4):**

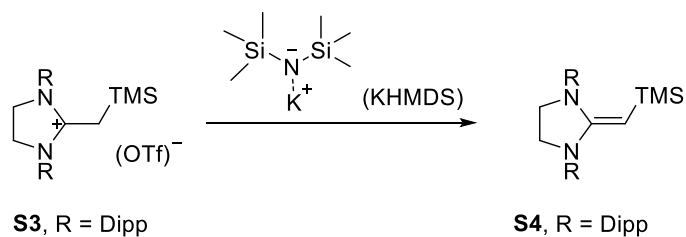

KHMDS (20 mL, 0.5 M in toluene) was added dropwise to a white slurry solution of **S3** (6.26 g, 10 mmol) in toluene (30 mL) at  $-80\text{ }^{\circ}\text{C}$ . The reaction mixture was allowed to warm slowly to room temperature and stirred overnight. The solvent was removed under reduced pressure and the residue was extracted with hexane (20 mL  $\times$  2). The remaining solid was washed with small amount of acetonitrile and dried *in vacuo* to afford **(L=CH)TMS (S4)** (2.64 g, yield = 55.5 %) as white powder. M. P. =  $135.0\text{ }^{\circ}\text{C}$  (Decomposition).  $^1\text{H}$  NMR (600.2 MHz,  $\text{C}_6\text{D}_6$ ):  $\delta$  = 7.21 ~ 7.17(m, 2 H,  $\text{C}_{\text{Ar}}\text{H}$ ), 7.14 ~ 7.11 (m, 4 H,  $\text{C}_{\text{Ar}}\text{H}$ ), 3.52 (m, 2 H,  $\text{NCH}_2$ ), 3.43 (m, 4 H,  $\text{CH}(\text{CH}_3)_2$ ), 3.34 (m, 2 H,  $\text{NCH}_2$ ), 2.30(s, 1 H,  $\text{CH}=\text{Si}$ ), 1.43 (d,  $J$  = 6.72 Hz, 6 H,  $\text{CH}(\text{CH}_3)_2$ ), 1.38 (d,  $J$  = 6.78 Hz, 6 H,  $\text{CH}(\text{CH}_3)_2$ ), 1.25 (d,  $J$  = 6.96 Hz, 6 H,  $\text{CH}(\text{CH}_3)_2$ ), 1.20 (d,  $J$  = 6.90 Hz, 6 H,  $\text{CH}(\text{CH}_3)_2$ ), -0.24 (s, 9 H,  $\text{Si}(\text{CH}_3)_3$ ).  $^{13}\text{C}\{^1\text{H}\}$  NMR (150.8 MHz,  $\text{C}_6\text{D}_6$ ):  $\delta$  = 159.80 (NCN), 149.49 ( $\text{C}_{\text{Ar}}$ ), 148.68 ( $\text{C}_{\text{Ar}}$ ), 140.13 ( $\text{C}_{\text{Ar}}$ ), 136.94 ( $\text{C}_{\text{Ar}}$ ), 128.85 ( $\text{C}_{\text{Ar}}$ ), 128.59 ( $\text{C}_{\text{Ar}}$ ), 128.35 ( $\text{C}_{\text{Ar}}$ ), 127.98 ( $\text{C}_{\text{Ar}}$ ), 125.22 ( $\text{C}_{\text{Ar}}$ ), 124.69 ( $\text{C}_{\text{Ar}}$ ), 59.03 (C=CH), 52.50 ( $\text{NCH}_2$ ), 49.71( $\text{NCH}_2$ ), 28.69, 28.59, 25.95, 24.88, 24.65, 23.66, 2.11 ( $\text{SiCH}_3$ )<sub>3</sub>. HRMS (ESI,  $m/z$ ) calc. for:  $\text{C}_{31}\text{H}_{49}\text{N}_2\text{Si}$ : 477.3660 [(M + H)]<sup>+</sup>; found: 477.3653.

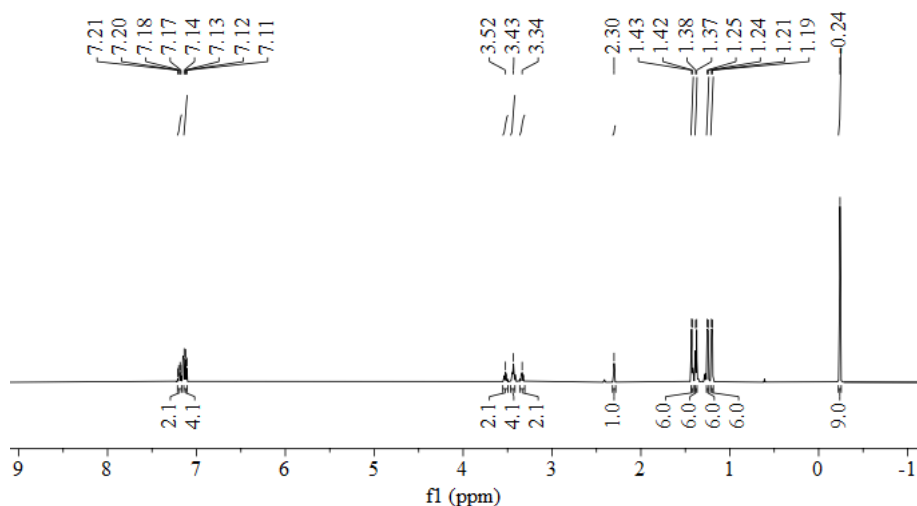

**Figure S18.**  $^1\text{H}$  NMR spectrum of **S4** in  $\text{C}_6\text{D}_6$ .

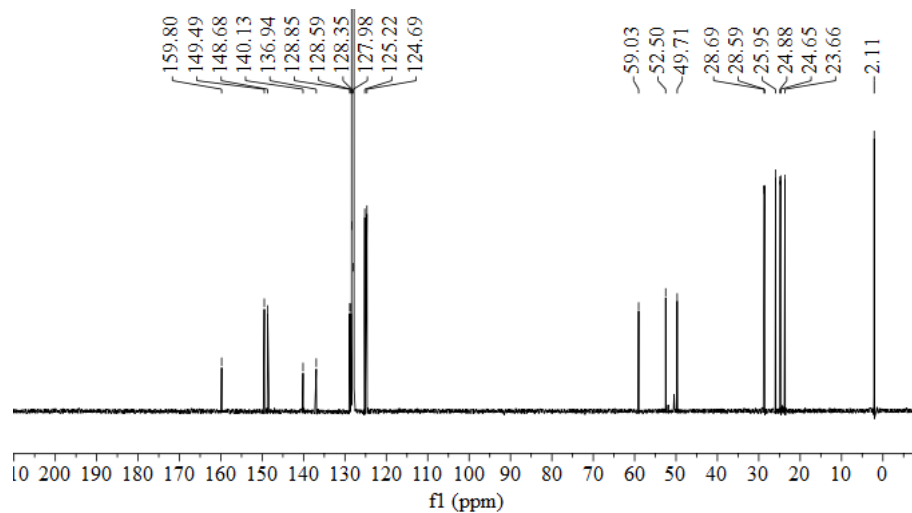

**Figure S19.**  $^{13}\text{C}\{^1\text{H}\}$  NMR spectrum of S4 in  $\text{C}_6\text{D}_6$ .

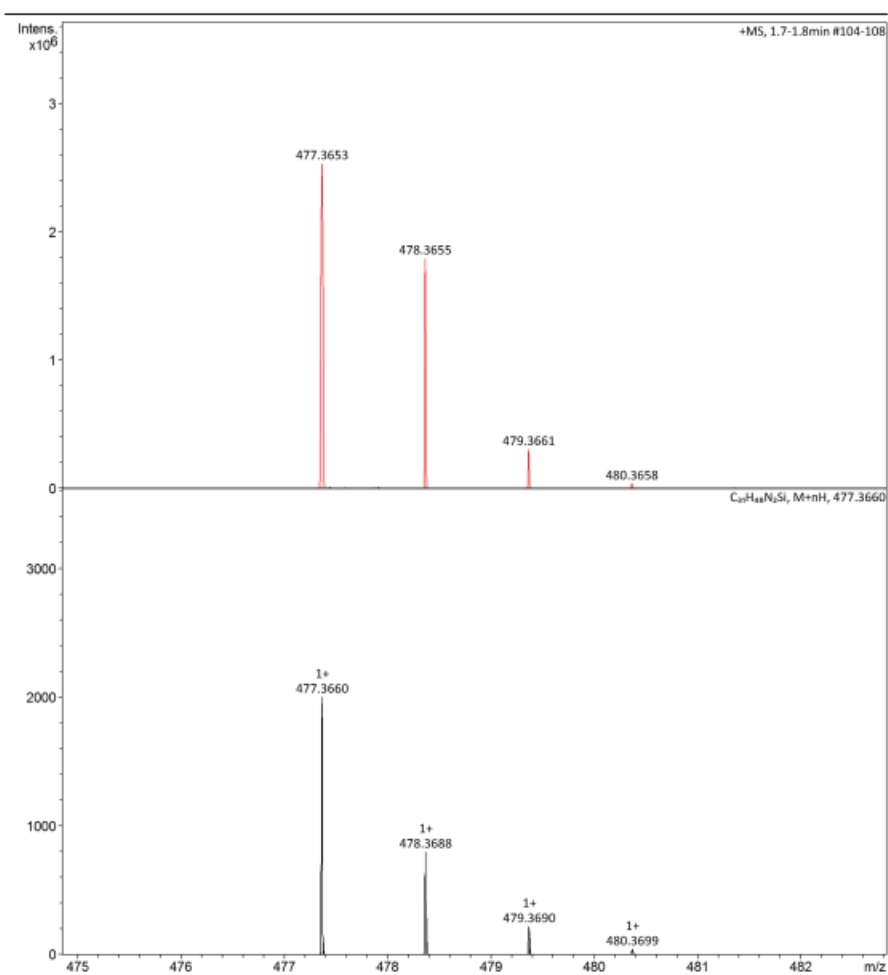

**Figure S20.** HRMS of S4.

### Synthesis of (L=CH)PCl<sub>2</sub> (**1b**):

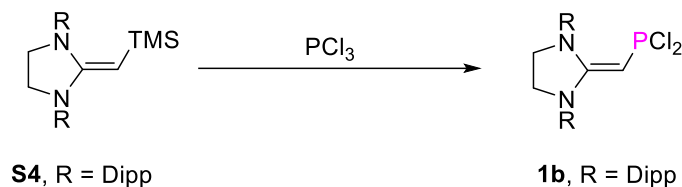

PCl<sub>3</sub> (1.51 g, 11 mmol) in THF (5 mL) was added dropwise to the solution of **S4** (4.77 g, 10 mmol) in THF (30 mL) at room temperature. After stirring for 2 hours, the solvent was removed under reduced pressure. The remaining solid was washed with hexane and dried *in vacuo* to afford (L=CH)PCl<sub>2</sub> (**1b**) (4.55 g, yield = 89.9 %) as white powder. M. P. = 139.0 °C (Decomposition). <sup>1</sup>H NMR (400.1 MHz, C<sub>6</sub>D<sub>6</sub>): δ = 7.22 (m, 2 H, C<sub>Ar</sub>H), 7.09 (d, *J* = 7.8 Hz, 2 H, C<sub>Ar</sub>H), 7.04 (d, *J* = 7.8 Hz, 2 H, C<sub>Ar</sub>H), 4.12 (d, <sup>2</sup>*J*<sub>PH</sub> = 6.5 Hz, CHPCl<sub>2</sub>), 3.32 (m, 4 H, NCH<sub>2</sub>), 3.19 (m, 2 H, CH(CH<sub>3</sub>)<sub>2</sub>), 3.07 (m, 2 H, CH(CH<sub>3</sub>)<sub>2</sub>), 1.47 (d, *J* = 6.8 Hz, 6 H, CH(CH<sub>3</sub>)<sub>2</sub>), 1.38 (d, *J* = 6.8 Hz, 6 H, CH(CH<sub>3</sub>)<sub>2</sub>), 1.18 (d, *J* = 7.0 Hz, 6 H, CH(CH<sub>3</sub>)<sub>2</sub>), 1.14 (d, *J* = 7.0 Hz, 12 H, CH(CH<sub>3</sub>)<sub>2</sub>). <sup>13</sup>C{<sup>1</sup>H} NMR (150.8 MHz, C<sub>6</sub>D<sub>6</sub>): δ = 160.79 (d, <sup>2</sup>*J*<sub>PC</sub> = 29.6 Hz, NCN), 148.48 (C<sub>Ar</sub>), 148.42 (C<sub>Ar</sub>), 135.46 (C<sub>Ar</sub>), 135.40 (C<sub>Ar</sub>), 133.65 (C<sub>Ar</sub>), 130.58 (C<sub>Ar</sub>), 130.01 (C<sub>Ar</sub>), 128.35 (C<sub>Ar</sub>), 128.15 (C<sub>Ar</sub>), 127.98 (C<sub>Ar</sub>), 125.64 (C<sub>Ar</sub>), 124.99 (C<sub>Ar</sub>), 75.96 (d, <sup>1</sup>*J*<sub>PC</sub> = 59.22 Hz, C-P), 50.92 (NCH), 50.34 (NCH), 29.05, 29.02, 25.66, 24.66, 24.49, 23.80. <sup>31</sup>P{<sup>1</sup>H} NMR (161.9 MHz, C<sub>6</sub>D<sub>6</sub>): δ = 183.65. HRMS (ESI, *m/z*) calc. for: C<sub>28</sub>H<sub>40</sub>Cl<sub>2</sub>N<sub>2</sub>P: 505.2301 [(M + H)<sup>+</sup>]; found: 505.2903.

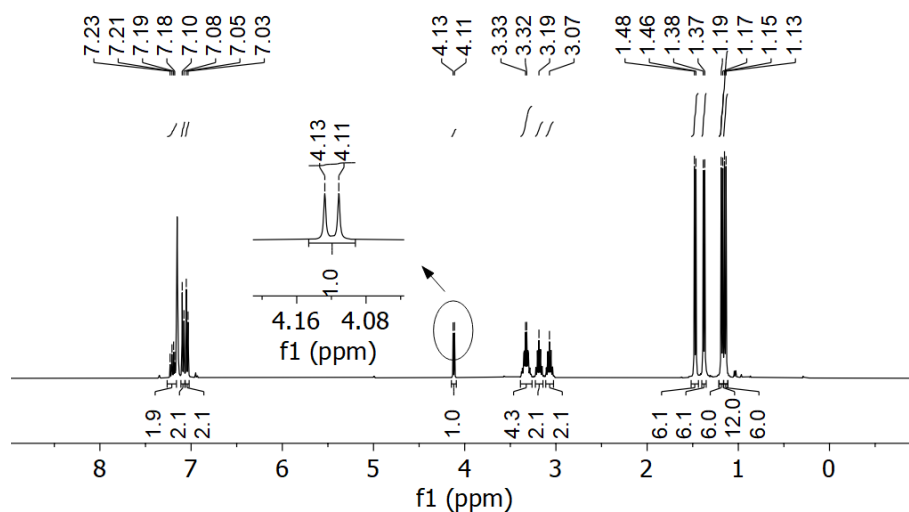

**Figure S21.**  $^1\text{H}$  NMR spectrum of **1b** in  $\text{C}_6\text{D}_6$ .

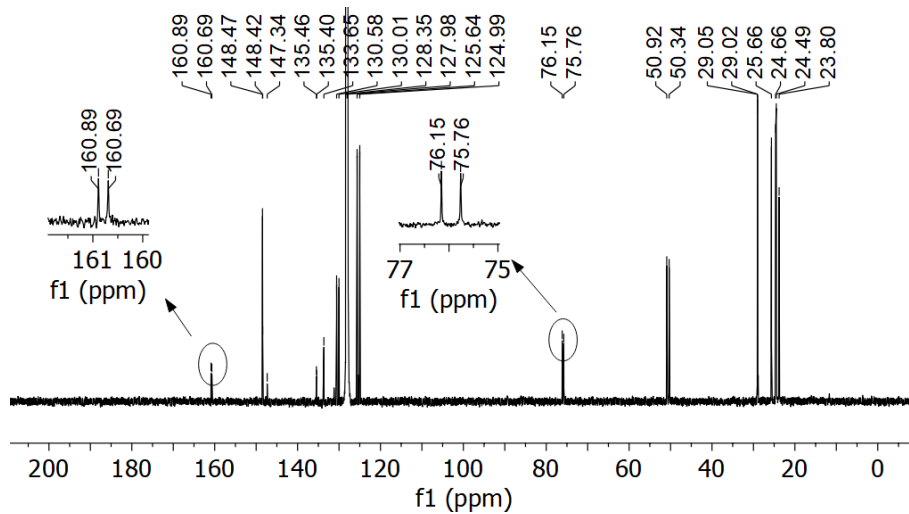

**Figure S22.**  $^{13}\text{C}\{^1\text{H}\}$  NMR spectrum of **1b** in  $\text{C}_6\text{D}_6$ .

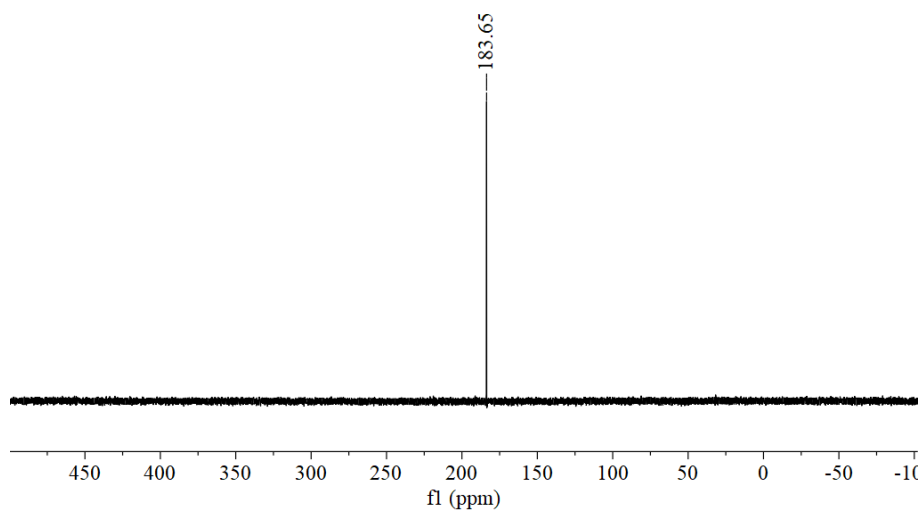

**Figure S23.**  $^{31}\text{P}\{^1\text{H}\}$  NMR spectrum of **1b** in  $\text{C}_6\text{D}_6$ .



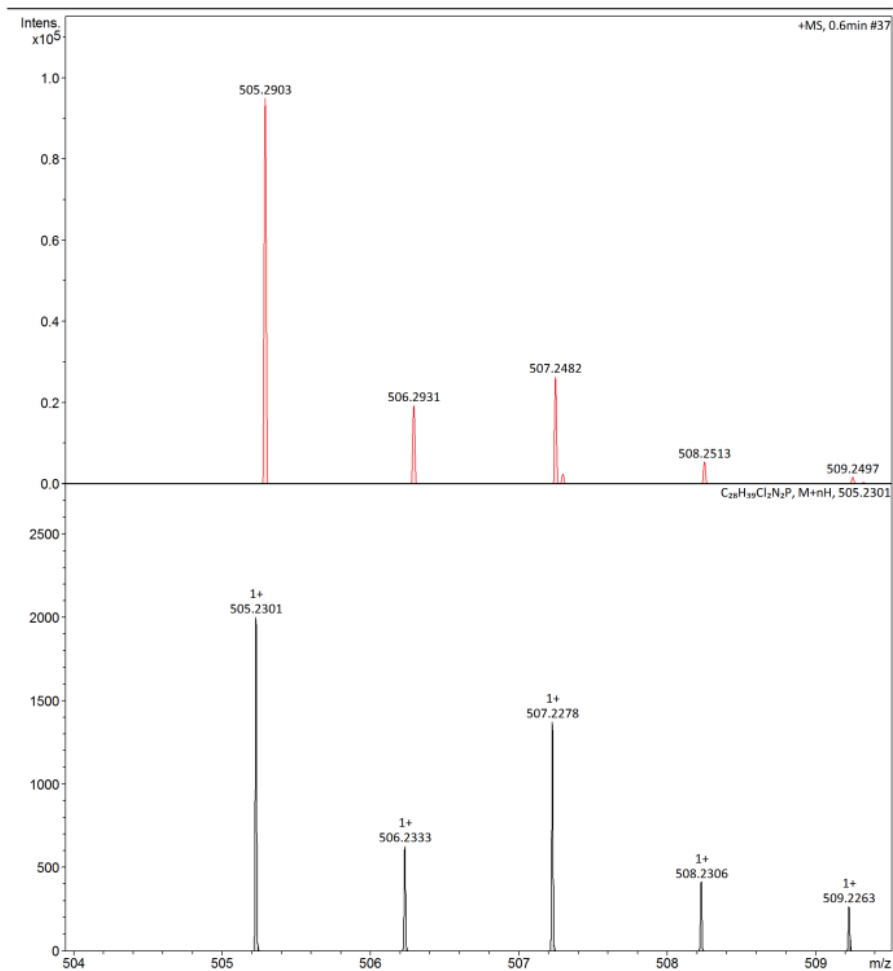

Figure S24. HRMS of 1b.

### Synthesis of *E*-2b and *Z*-2b:

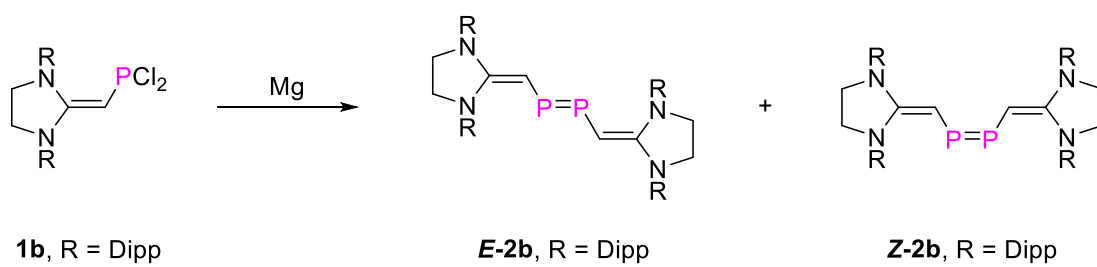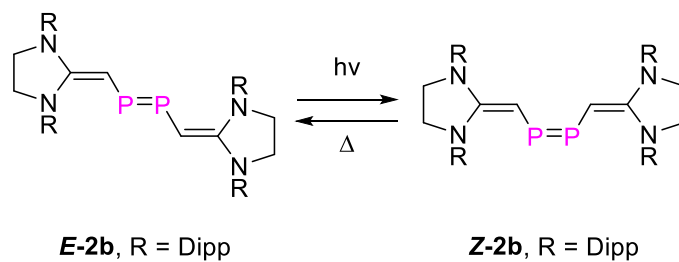

Mg powder (10 eq.) was added to a solution of **1b** (0.51 g, 10 mmol) in THF (20 mL) at room temperature. After stirring overnight in dark, two new species were formed as monitored via  $^{31}\text{P}$  NMR spectra as: *E*-**2b** ( $\delta = 380.76$  ppm):*Z*-**2b** ( $\delta = 380.76$  ppm) = 1.0:0.3. Then, the solvent was removed under reduced pressure and the residue was extracted with toluene to afford purple filtrate.

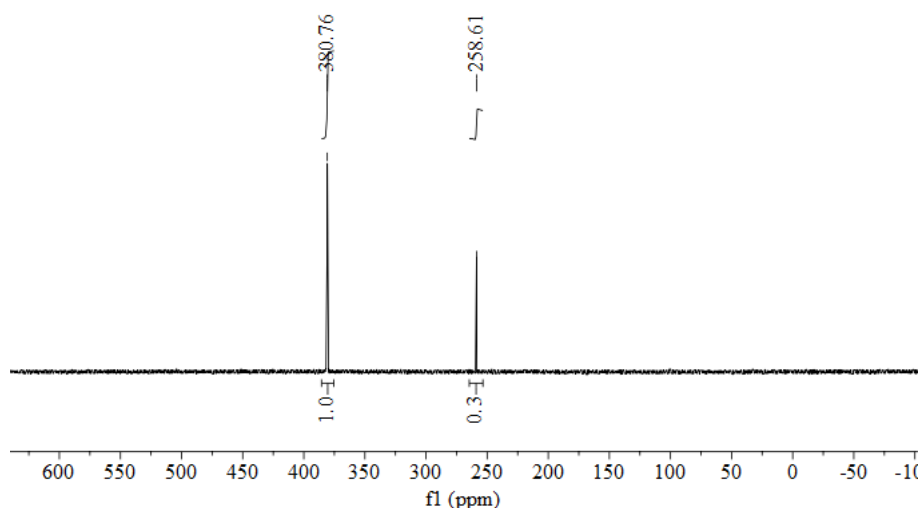

**Figure S25.**  $^{31}\text{P}\{^1\text{H}\}$  NMR spectrum of the reaction mixture in THF.

***E*-2b:** The filtrate was heated to 110 °C in the dark for 20 min to enrich the *E*-**2b** (*E*-**2b**:*Z*-**2b** = 1.0:0.1) and then the solvent was removed under reduced pressure. The residue was recrystallized from cold pentane at -30 °C and dried *in vacuo* to afford *E*-**2b** (269.46 mg, yield: 62.0 %) as red powder. Red crystals of *E*-**2b** were obtained from a saturated *n*-pentane solution stored at -30 °C for 1 day. M. P. > 250 °C.  $^1\text{H}$  NMR (600.2 MHz,  $\text{C}_6\text{D}_6$ ):  $\delta = 7.14$  (t, 2 H,  $J = 7.5$  Hz,  $\text{C}_{\text{Ar}}\text{H}$ ), 7.07 (t, 2 H,  $J = 7.5$  Hz,  $\text{C}_{\text{Ar}}\text{H}$ ), 7.02 (d, 4 H,  $J = 7.5$  Hz,  $\text{C}_{\text{Ar}}\text{H}$ ), 6.96 (d, 4 H,  $J = 7.5$  Hz,  $\text{C}_{\text{Ar}}\text{H}$ ), 4.98 (s, 2 H,  $\text{CH-P}$ ), 3.38 (m, 4 H,  $\text{NCH}_2$ ), 3.33 (m, 4 H,  $\text{NCH}_2$ ), 3.30 (m, 4 H,  $\text{CH}(\text{CH}_3)_2$ ), 3.19 (m, 4 H,  $\text{CH}(\text{CH}_3)_2$ ), 1.28 (d, 12 H,  $J = 6.8$  Hz,  $\text{CH}(\text{CH}_3)_2$ ), 1.22 (d, 12 H,  $J = 7.3$  Hz,  $\text{CH}(\text{CH}_3)_2$ ), 1.21 (d, 12 H,  $J = 7.9$  Hz,  $\text{CH}(\text{CH}_3)_2$ ), 1.20 (d, 12 H,  $J = 7.8$  Hz,  $\text{CH}(\text{CH}_3)_2$ ).  $^{13}\text{C}\{^1\text{H}\}$  NMR (150.8 MHz,  $\text{C}_6\text{D}_6$ ):  $\delta = 155.13$  (t,  $\text{NCN}$ ), 149.56 ( $\text{C}_{\text{Ar}}$ ), 148.86 ( $\text{C}_{\text{Ar}}$ ), 148.27 ( $\text{C}_{\text{Ar}}$ ), 137.70 ( $\text{C}_{\text{Ar}}$ ), 136.05 ( $\text{C}_{\text{Ar}}$ ), 128.84 ( $\text{C}_{\text{Ar}}$ ), 128.74 ( $\text{C}_{\text{Ar}}$ ), 128.35 ( $\text{C}_{\text{Ar}}$ ), 128.14 ( $\text{C}_{\text{Ar}}$ ), 127.98 ( $\text{C}_{\text{Ar}}$ ), 124.51 ( $\text{C}_{\text{Ar}}$ ), 124.47 ( $\text{C}_{\text{Ar}}$ ), 79.81 ( $\text{C-P}$ ), 51.80 ( $\text{NCH}$ ), 50.53 ( $\text{NCH}$ ), 28.91, 28.82, 25.31, 24.83, 24.43, 23.84.  $^{31}\text{P}\{^1\text{H}\}$  NMR (161.9 MHz,  $\text{C}_6\text{D}_6$ ):  $\delta = 379.58$ .

UV/Vis (Tol,  $\lambda$  (nm)  $\epsilon$  ( $M^{-1}cm^{-1}$ )): 534 (17798.9); 401 (2972.8). HRMS (ESI,  $m/z$ ) calc. for:  $C_{56}H_{78}N_4P_2$ : 868.57 [(M + H) $^+$ ]; found: 869.5774.

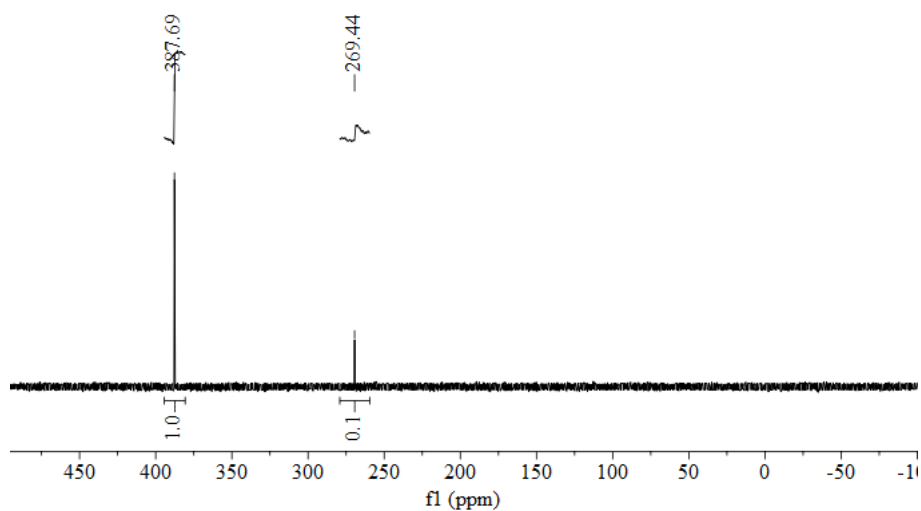

**Figure S26.**  $^{31}P\{^1H\}$  NMR spectrum of the reaction mixture in toluene after heated to  $110^\circ C$  in the dark for 20 min.

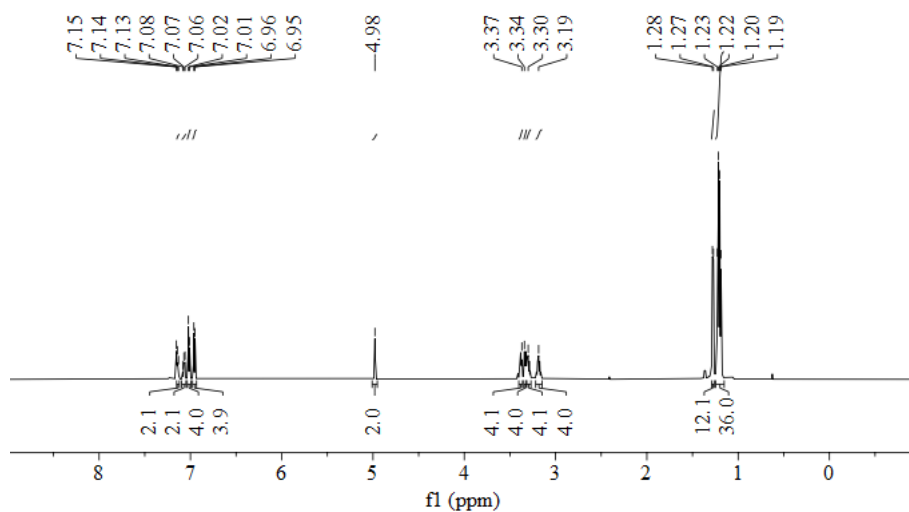

**Figure S27.**  $^1H$  NMR of *E*-**2b** in  $C_6D_6$ .

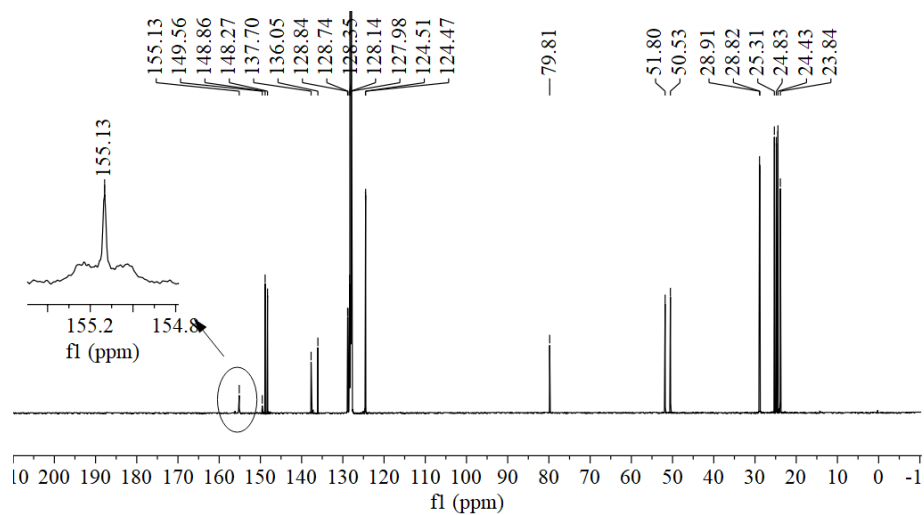

**Figure S28.**  $^{13}\text{C}\{^1\text{H}\}$  NMR of *E-2b* in  $\text{C}_6\text{D}_6$ .

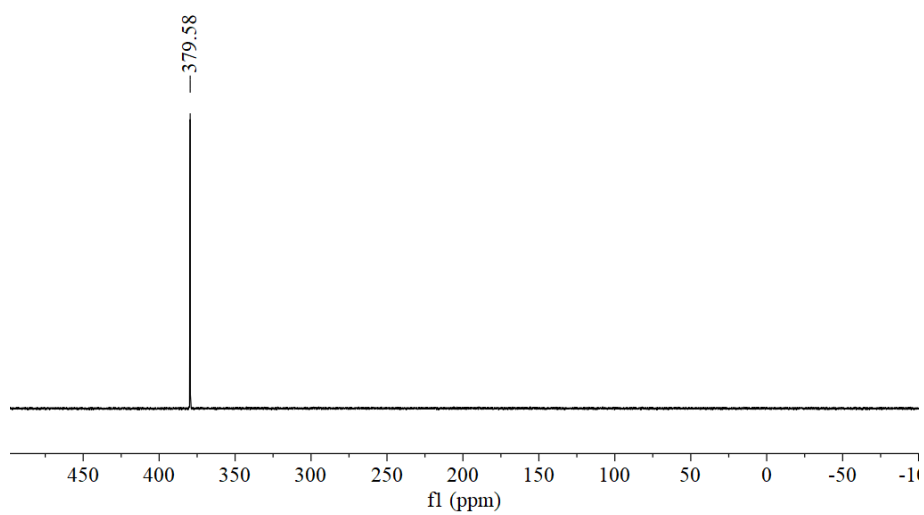

**Figure S29.**  $^{31}\text{P}\{^1\text{H}\}$  NMR of *E-2b* in  $\text{C}_6\text{D}_6$ .

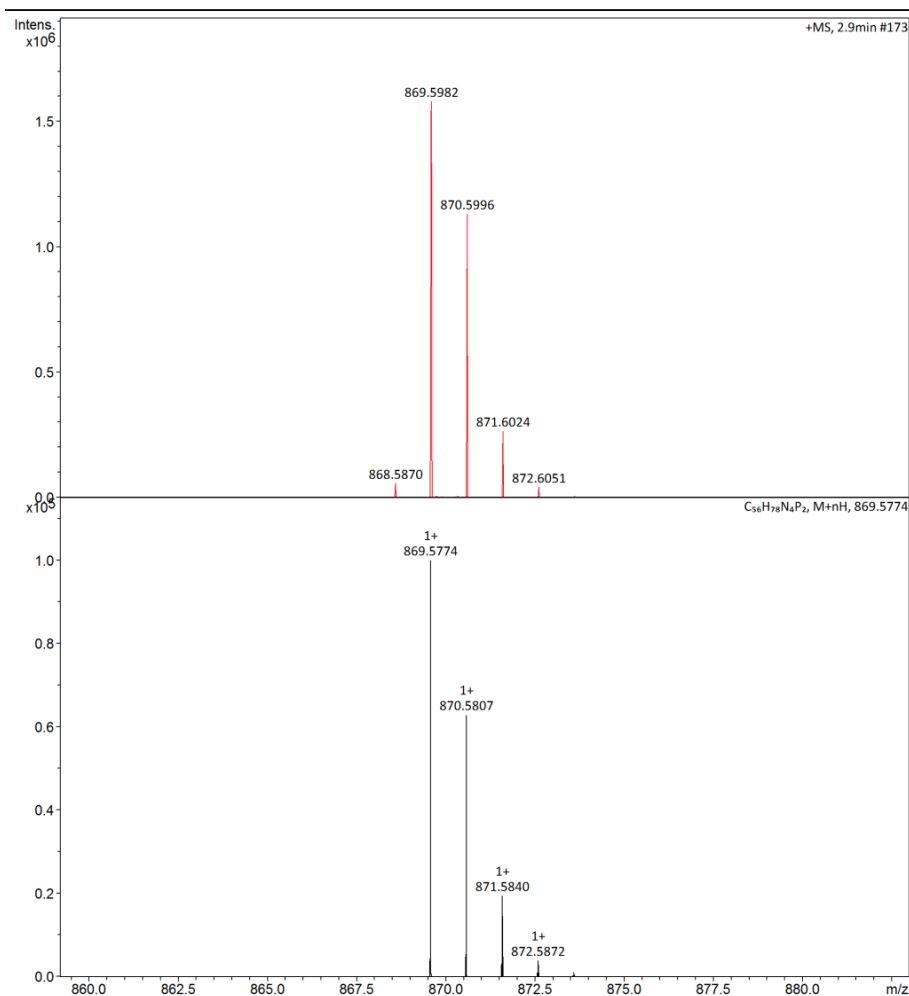

**Figure S30.** HRMS of **E-2b**.

**Z-2b:** The filtrate was irradiated with UV light (Hg lamp) for 30 min at 0 °C leading to predominantly **Z-2b** (**E-2b**:**Z-2b** = 1.0:21.6), then the solvent was removed under reduced pressure. The residue was recrystallized from cold pentane at -30 °C and dried *in vacuo* to afford **Z-2b** (290.32 mg, yield: 66.8 %) as orange powder. Orange crystals of **Z-2b** were obtained from a saturated *n*-pentane solution stored at -30 °C for 3 days. M. P. > 250 °C.  $^1H$  NMR(600.2 MHz,  $C_6D_6$ ):  $\delta$  = 7.23 (t, 2 H,  $J$  = 7.5 Hz,  $C_{Ar}H$ ), 7.13 (t, 2 H,  $J$  = 7.5 Hz,  $C_{Ar}H$ ), 7.05 (d, 4 H,  $J$  = 7.5 Hz,  $C_{Ar}H$ ), 7.01 (d, 4 H,  $J$  = 7.5 Hz,  $C_{Ar}H$ ), 4.61 (s, 2 H,  $CH-P$ ), 3.34 (t, 4 H,  $J$  = 7.3 Hz,  $NCH_2$ ), 3.28 (m, 4 H,  $CH(CH_3)_2$ ), 3.25 (t, 4 H,  $J$  = 7.3 Hz,  $NCH_2$ ), 3.07 (m, 4 H,  $CH(CH_3)_2$ ), 1.30 (d, 12 H,  $J$  = 6.7 Hz,  $CH(CH_3)_2$ ), 1.24 (d, 12 H,  $J$  = 6.9 Hz,  $CH(CH_3)_2$ ), 1.20 (d, 12 H,  $J$  = 6.9 Hz,  $CH(CH_3)_2$ ), 1.06 (d, 12 H,  $J$  = 6.7 Hz,  $CH(CH_3)_2$ ).  $^{13}C\{^1H\}$  NMR (150.8 MHz,  $C_6D_6$ ):  $\delta$  = 155.43 (t,  $NCN$ ), 148.86 ( $C_{Ar}$ ), 148.29 ( $C_{Ar}$ ), 147.66 ( $C_{Ar}$ ), 138.60 ( $C_{Ar}$ ), 136.26 ( $C_{Ar}$ ), 128.94

(C<sub>Ar</sub>), 128.80 (C<sub>Ar</sub>), 128.35 (C<sub>Ar</sub>), 128.14 (C<sub>Ar</sub>), 127.98 (C<sub>Ar</sub>), 125.06 (C<sub>Ar</sub>), 124.71 (C<sub>Ar</sub>), 79.85 (t, <sup>1</sup>J<sub>PC</sub> = 39.24 Hz, CP), 52.34 (NCH), 50.98 (NCH), 29.01, 28.84, 25.35, 24.86, 24.17, 23.74. <sup>31</sup>P{<sup>1</sup>H} NMR (242.9 MHz, C<sub>6</sub>D<sub>6</sub>): δ = 259.46. UV/Vis (Tol, λ (nm) ε (M<sup>-1</sup>cm<sup>-1</sup>)): 482 nm (23376.2); 359 (2762.8). HRMS (ESI, m/z) calc. for: C<sub>56</sub>H<sub>79</sub>N<sub>4</sub>P<sub>2</sub>: 868.5774 [(M + H)<sup>+</sup>]; found: 869.5577.

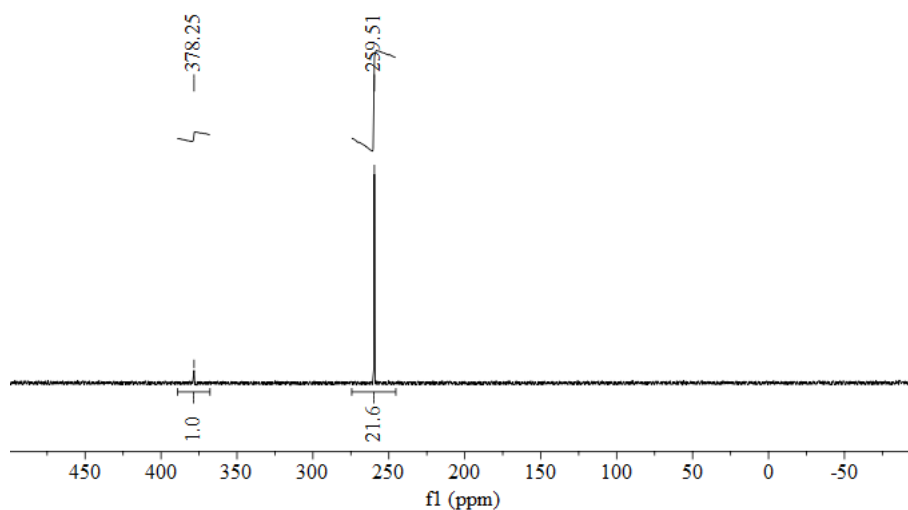

**Figure S31.** <sup>31</sup>P{<sup>1</sup>H} NMR spectrum of the reaction mixture in toluene after irradiated with UV light (Hg lamp) for 30 min at 0 °C.

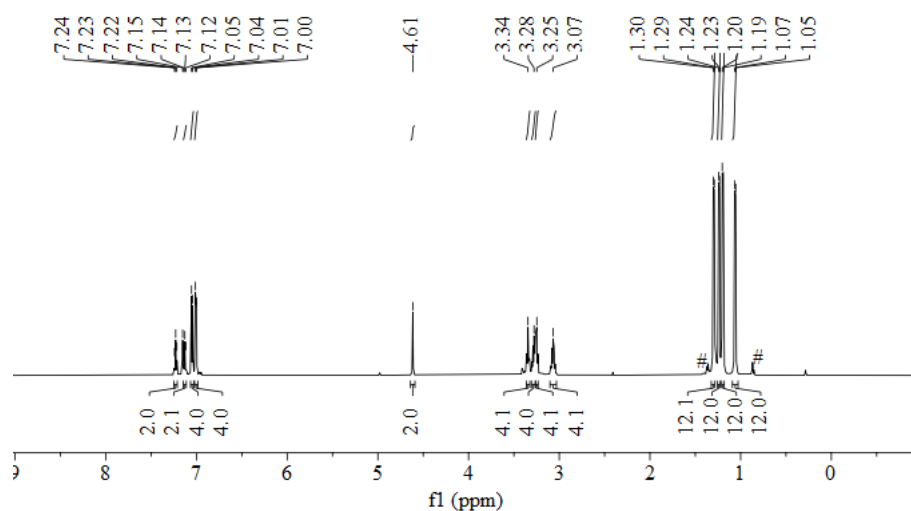

**Figure S32.** <sup>1</sup>H NMR of Z-2b in C<sub>6</sub>D<sub>6</sub>. # n-pentane.

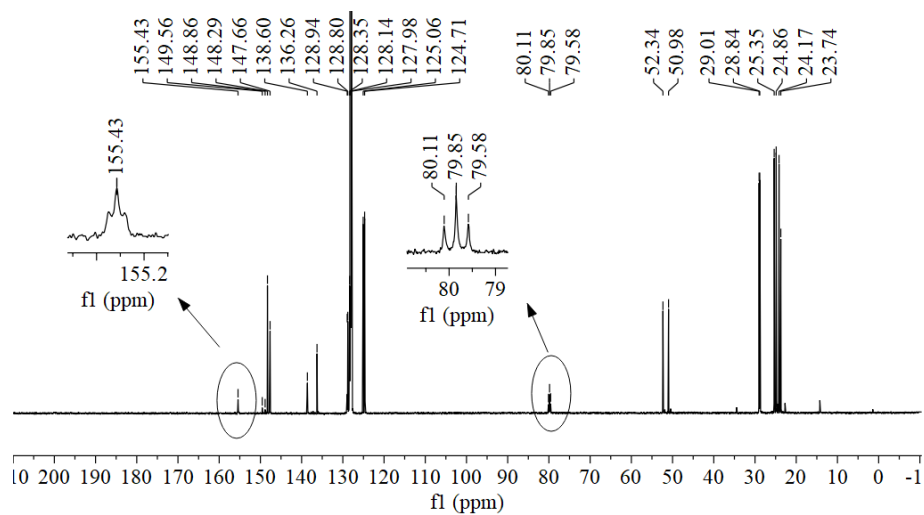

**Figure S33.**  $^{13}\text{C}\{^1\text{H}\}$  NMR of **Z-2b** in  $\text{C}_6\text{D}_6$ .

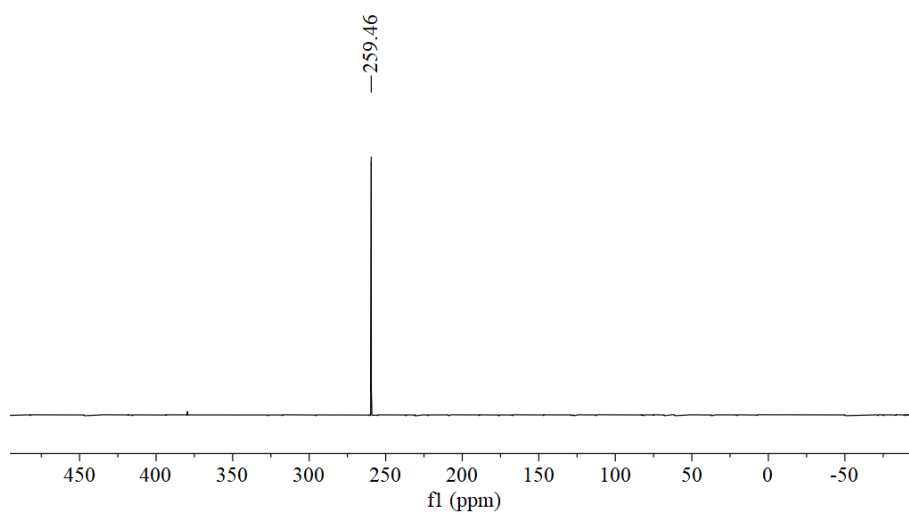

**Figure S34.**  $^{31}\text{P}\{^1\text{H}\}$  NMR of **Z-2b** in  $\text{C}_6\text{D}_6$ .

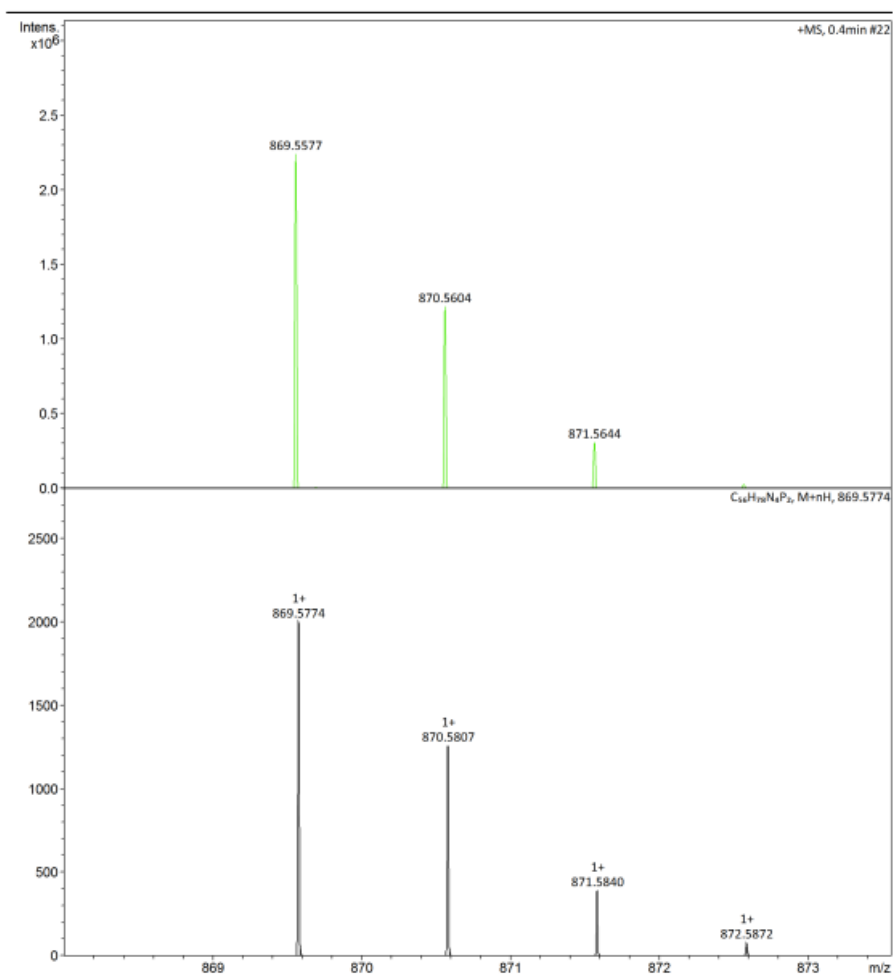

**Figure S35:** HRMS of **Z-2b**.

### Synthesis of [AuCl(**2b**)]:

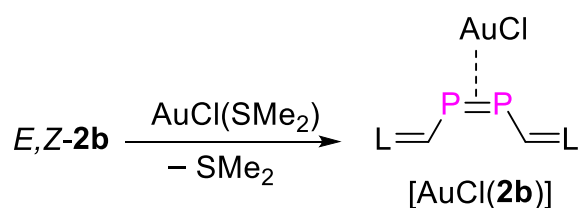

Chloro(dimethylsulfide)gold(I) (75 mg, 0.26 mmol) was added to the solution of **Z-2b** or **E-2b** (250 mg, 0.29 mmol) in THF (20 mL) at room temperature and stirred for 1 hour. Then, the solvent was removed under reduced pressure. The remaining solid was wash with hexanes and dried *in vacuo* to afford [AuCl(**2b**)] (257 mg, yield = 91.5 %) as dark red powder. Red crystals of [AuCl(**2b**)] were obtained from a saturated fluorobenzene solution via laying hexane at -30 °C. M. P. = 129.0 °C (Decomposition). <sup>1</sup>H NMR (400.1 MHz, C<sub>6</sub>D<sub>6</sub>): δ = 7.12 (d, *J* = 7.44 Hz, 4 H, C<sub>Ar</sub>H), 7.02 (t, *J* = 7.44 Hz,



8 H,  $C_{Ar}H$ ), 4.12 (s, 2 H,  $C=CH-P$ ), 3.32 (m, 4 H,  $NCH_2$ ), 3.27 (m, 4 H,  $NCH_2$ ), 3.17 (m, 4 H,  $CH(CH_3)_2$ ), 2.95 (m, 4 H,  $CH(CH_3)_2$ ), 1.41 (d,  $J = 6.84$  Hz, 12 H,  $CH(CH_3)_2$ ), 1.19 (d,  $J = 6.84$  Hz, 12 H,  $CH(CH_3)_2$ ), 1.15 (d,  $J = 6.96$  Hz, 12 H,  $CH(CH_3)_2$ ), 1.12 (d,  $J = 6.88$  Hz, 12 H,  $CH(CH_3)_2$ ).  $^{13}C\{^1H\}$  NMR (100.5 MHz,  $C_6D_6$ ):  $\delta = 159.17$  (NCN), 148.11 ( $C_{Ar}$ ), 147.41 ( $C_{Ar}$ ), 137.28 ( $C_{Ar}$ ), 134.35 ( $C_{Ar}$ ), 129.99 ( $C_{Ar}$ ), 129.42 ( $C_{Ar}$ ), 125.46 ( $C_{Ar}$ ), 125.11 ( $C_{Ar}$ ), 74.64 (NC=CH), 51.91 (NCH), 50.74 (NCH), 29.00, 25.53, 24.24, 24.15, 1.95.  $^{31}P\{^1H\}$  NMR (161.9 MHz,  $C_6D_6$ ):  $\delta = 153.80$ . UV/Vis (THF,  $\lambda$  (nm)  $\epsilon$  ( $M^{-1}cm^{-1}$ )): 480 (8215). HRMS (ESI,  $m/z$ ) calc. for:  $C_{56}H_{79}AuClN_4P_2$ : 1101.5129 [(M + H) $^+$ ]; found: 1101.5251.

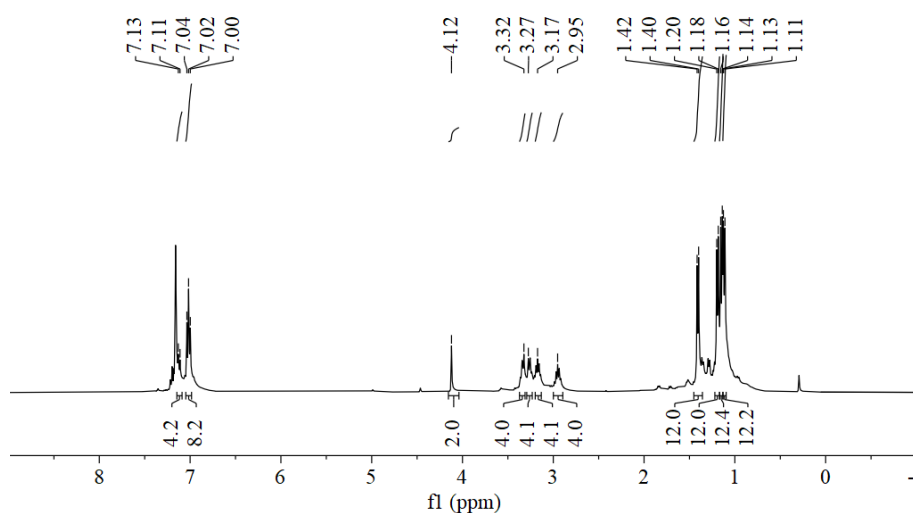

**Figure S36.**  $^1H$  NMR spectrum of  $[AuCl(2b)]$  in  $C_6D_6$ .

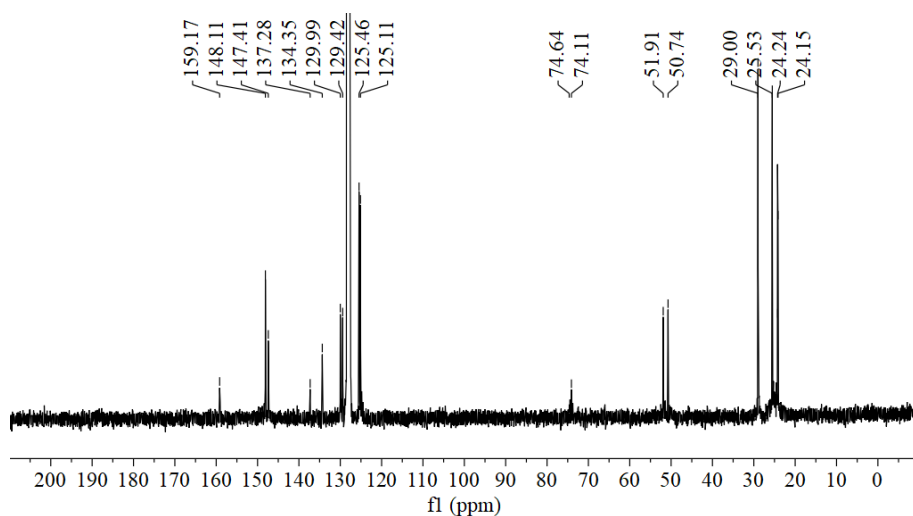

**Figure S37.**  $^{13}C\{^1H\}$  NMR spectrum of  $[AuCl(2b)]$  in  $C_6D_6$ .

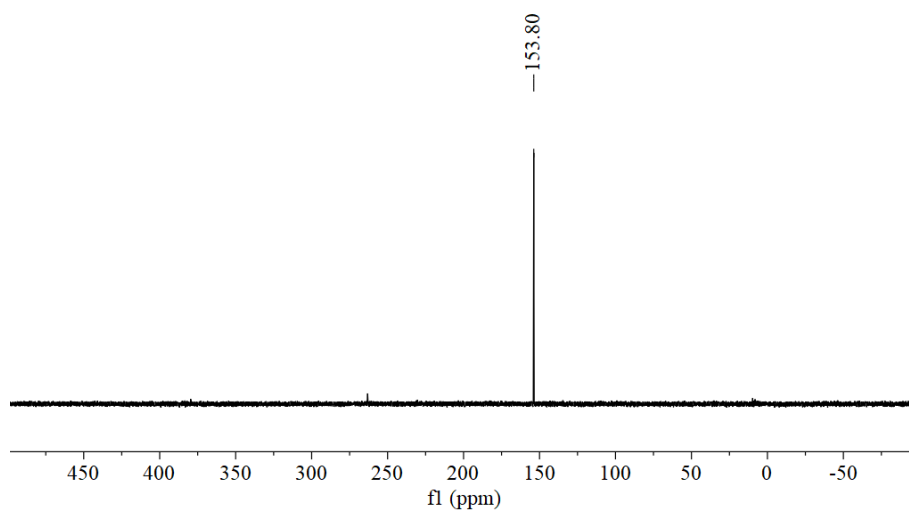

**Figure S38.**  $^{31}\text{P}\{^1\text{H}\}$  NMR spectrum of  $[\text{AuCl}(\mathbf{2b})]$  in  $\text{C}_6\text{D}_6$ .

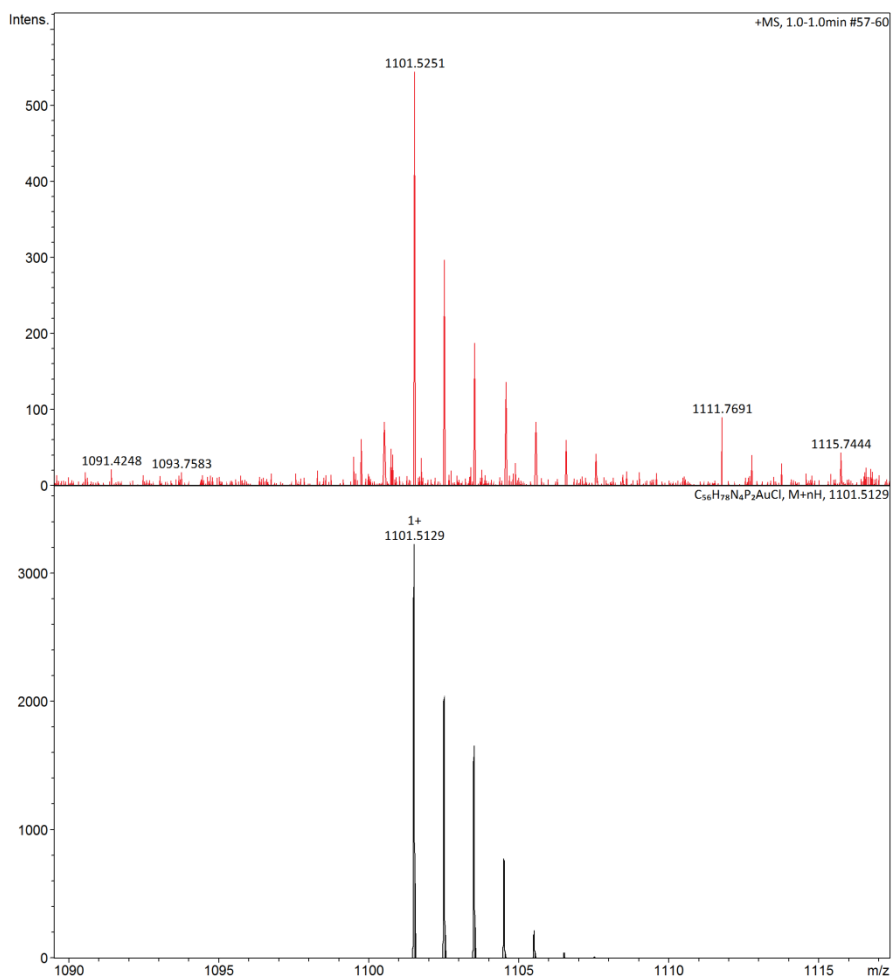

**Figure S39.** HRMS of  $[\text{AuCl}(\mathbf{2b})]$

### Synthesis of **3**:

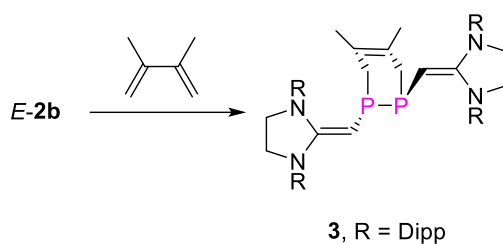

2,3-Dimethyl-1,3-butadiene (72 mg, 0.88 mmol) in toluene (3 mL) was added to the solution of *E*-**2b** (750 mg, 0.86 mmol) in toluene (10 mL) at room temperature. After stirring for 15 min in the dark, the solvent was removed under reduced pressure, and the residue was washed with acetonitrile and dry *in vacuo* to afford **3** (360 mg, yield = 43.8 %) as light orange powder. Light orange crystals of **3** were obtained from a saturated hexane solution stored at -30 °C for 3 days. M. P. = 170.0 °C (Decomposition). <sup>1</sup>H NMR (600.2 MHz, C<sub>6</sub>D<sub>6</sub>): δ = 7.27 ~ 7.04 (12 H, C<sub>Ar</sub>H), 3.61 (m, 2 H, CH(CH<sub>3</sub>)<sub>2</sub>), 3.55 (m, 2 H, CH(CH<sub>3</sub>)<sub>2</sub>), 3.46 (m, 2 H, CH(CH<sub>3</sub>)<sub>2</sub>), 3.39 (m, 2 H, CH(CH<sub>3</sub>)<sub>2</sub>), 3.31 (m, 4 H, NCH<sub>2</sub>), 3.23 (m, 4 H, NCH<sub>2</sub>), 2.68 (t, 2 H, *J* = 2.7 Hz, C=CH-P), 1.63 (m, 2 H, PCH<sub>2</sub>), 1.41~1.35 (32 H, PCH<sub>2</sub> & CH<sub>3</sub> & CH(CH<sub>3</sub>)<sub>2</sub>), 1.29 (d, 6 H, *J* = 6.90 Hz, CH(CH<sub>3</sub>)<sub>2</sub>), 1.21~1.18 (18 H, CH(CH<sub>3</sub>)<sub>2</sub>). <sup>13</sup>C {<sup>1</sup>H} NMR (150.8 MHz, C<sub>6</sub>D<sub>6</sub>): δ = 157.06 (t, <sup>2</sup>*J*<sub>PC</sub> = 19.26 Hz, NCN), 149.50 (-(CH<sub>3</sub>)CH=CH(CH<sub>3</sub>)-), 149.34 (C<sub>Ar</sub>), 149.24 (C<sub>Ar</sub>), 147.46 (C<sub>Ar</sub>), 140.28 (C<sub>Ar</sub>), 136.50 (C<sub>Ar</sub>), 128.53 (C<sub>Ar</sub>), 128.35 (C<sub>Ar</sub>), 124.68 (C<sub>Ar</sub>), 124.64 (C<sub>Ar</sub>), 124.14 (C<sub>Ar</sub>), 124.04 (C<sub>Ar</sub>), 60.55 (-(CH<sub>3</sub>)CH=CH(CH<sub>3</sub>)-), 52.07 (NCH<sub>2</sub>), 49.91 (NCH<sub>2</sub>), 31.05 (t, PCH=C), 29.03, 28.50, 28.47, 26.02, 25.91, 25.26, 25.16, 24.91, 24.36, 24.13 (t, <sup>1</sup>*J*<sub>PC</sub> = 14.45 Hz, PCH<sub>2</sub>), 23.42, 22.32. <sup>31</sup>P {<sup>1</sup>H} NMR (242.9 MHz, C<sub>6</sub>D<sub>6</sub>): δ = -68.00. UV/Vis (THF, λ (nm) ε (M<sup>-1</sup>cm<sup>-1</sup>)): 253 (42129.3). HRMS (ESI, m/z) calc. for: C<sub>62</sub>H<sub>89</sub>N<sub>4</sub>P<sub>2</sub>: 951.6557 [M + H]<sup>+</sup>; found: 951.6703.

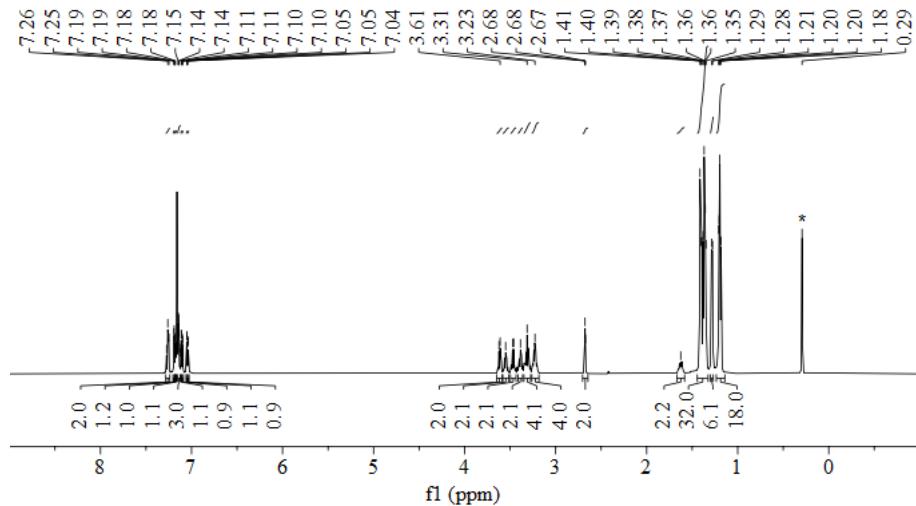

**Figure S40.**  $^1\text{H}$  NMR spectrum of **3** in  $\text{C}_6\text{D}_6$ . \*Silicon grease.

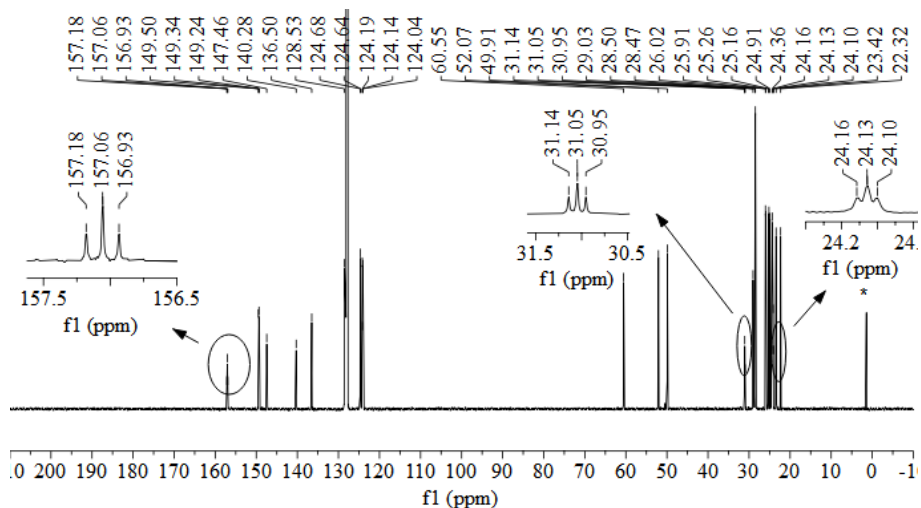

**Figure S41.**  $^{13}\text{C}\{^1\text{H}\}$  NMR spectrum of **3** in  $\text{C}_6\text{D}_6$ . \*Silicone grease.

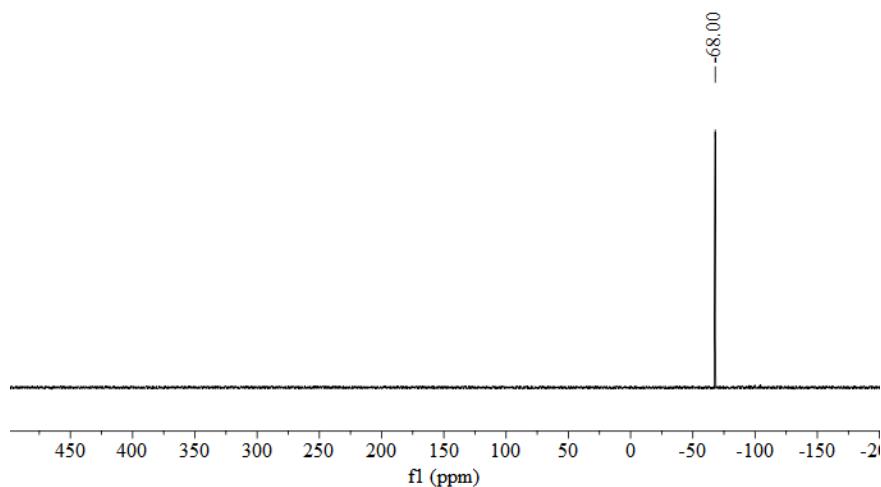

**Figure S42.**  $^{31}\text{P}\{^1\text{H}\}$  NMR spectrum of **3** in  $\text{C}_6\text{D}_6$ .

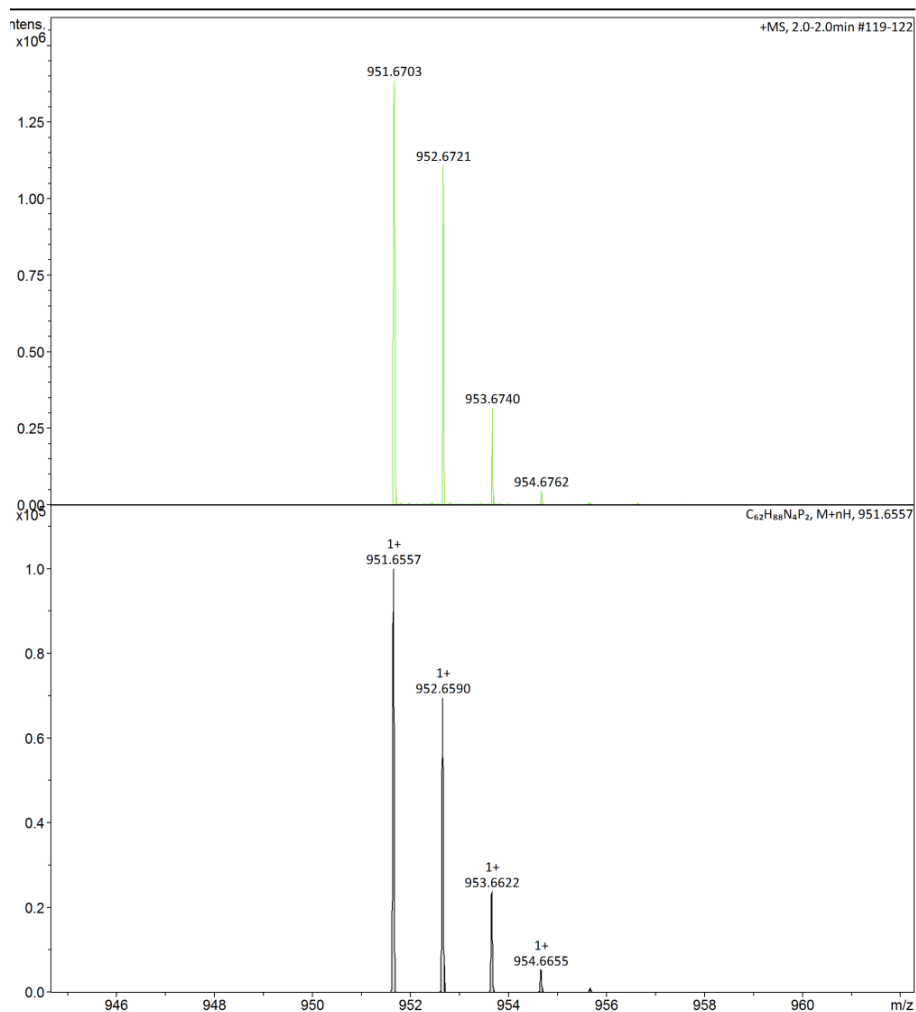

**Figure S43.** HRMS of **3**.

The reaction of **Z-2b** with 2,3-Dimethyl-1,3-butadiene:

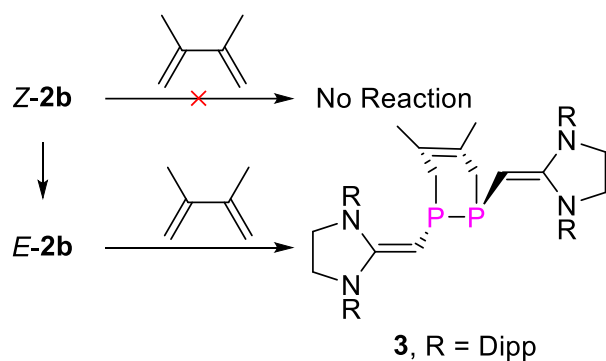

A drop of 2,3-Dimethyl-1,3-butadiene was added to a solution of **Z-2b** (10 mg) in  $\text{C}_6\text{D}_6$  (0.4 mL). The  $^{31}\text{P}$  NMR monitoring shows below:

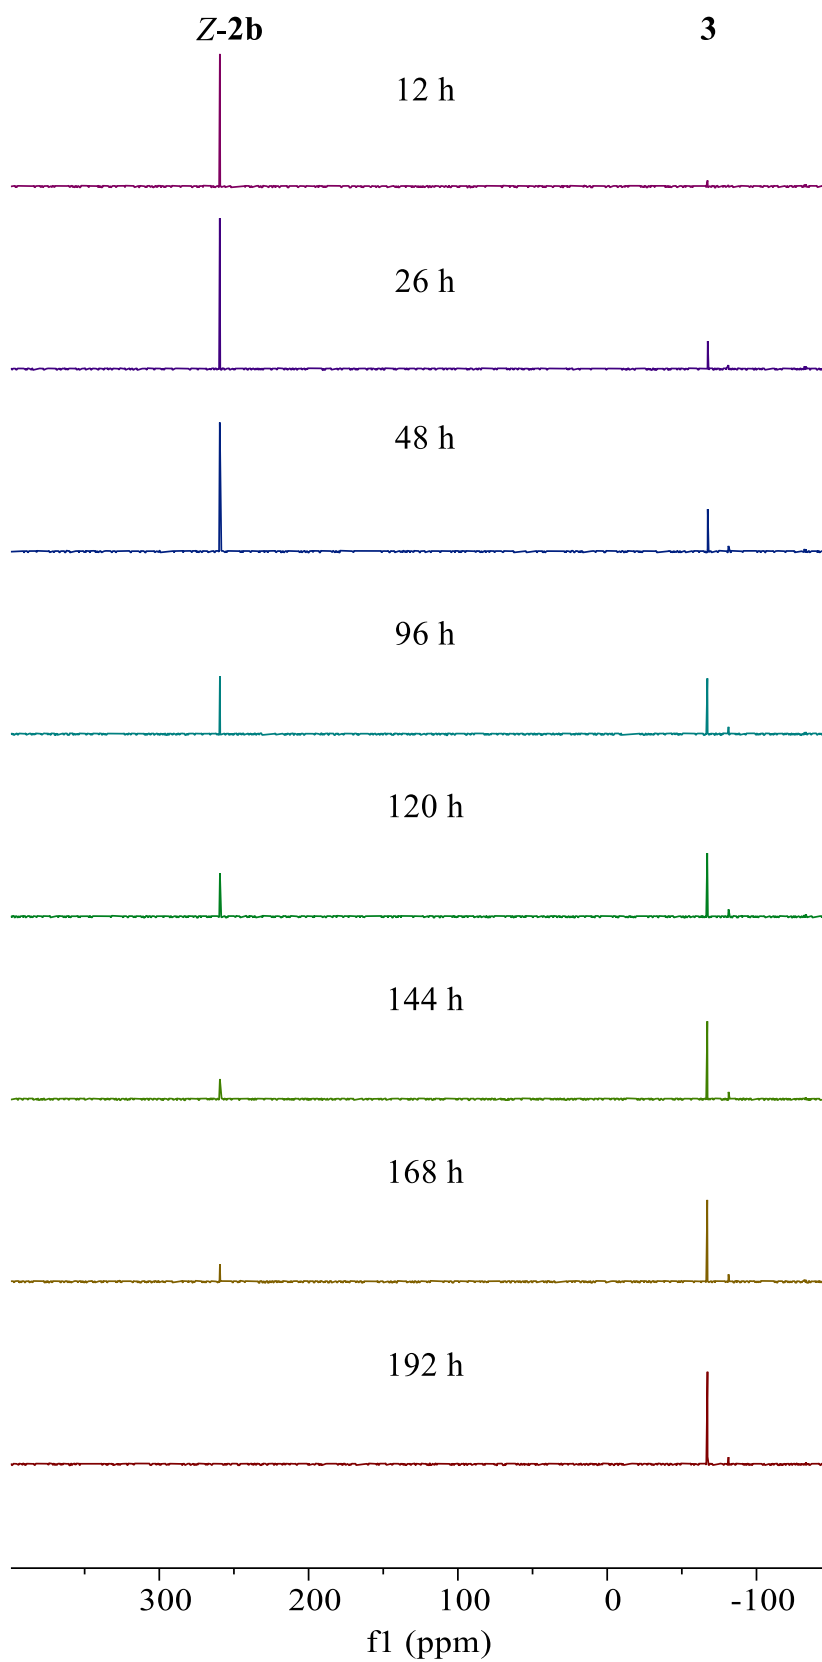

**Figure S44.**  $^{31}\text{P}$  NMR spectra monitoring of the reaction of **Z-2b** ( $\delta = 259.4$  ppm) with 2,3-Dimethyl-1,3-butadiene to afford **3** ( $\delta = 67.0$  ppm) in  $\text{C}_6\text{D}_6$ .

## Synthesis of 4:

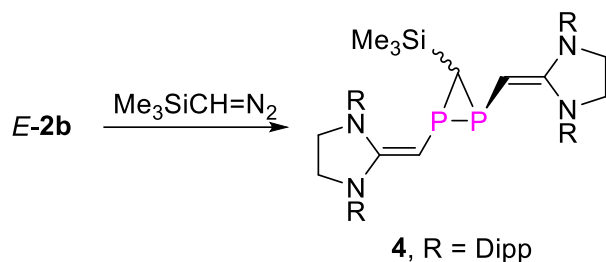

(Trimethylsilyl)diazomethane (2M in hexane, 0.5 mL) was added to the solution of *E*-**2b** (400 mg, 0.46 mmol) in toluene (10 mL). After stirring for 15 min in the dark, the solvent was removed under reduced pressure, and the residue was washed with acetonitrile and dry in vacuo to afford **4** (389 mg, yield = 86.0 %) as light-yellow powder. Light yellow crystals of **4** were obtained from a saturated hexane solution via slow evaporation at room temperature. M. P. = 103.0 °C (Decomposition). <sup>1</sup>H NMR (600.2 MHz, C<sub>6</sub>D<sub>6</sub>): δ = 7.29 (t, 1 H, *J* = 7.62 Hz, C<sub>Ar</sub>H), 7.24~7.19 (3 H, C<sub>Ar</sub>H), 7.15~7.10 (3 H, C<sub>Ar</sub>H), 7.08 (d, 1 H, *J* = 7.74 Hz, C<sub>Ar</sub>H), 7.04~7.01 (3 H, C<sub>Ar</sub>H), 6.90 (d, 1 H, *J* = 7.50 Hz, C<sub>Ar</sub>H), 3.54 (m, 2 H, NCH<sub>2</sub>), 3.49~3.26 (12 H, NCH<sub>2</sub> & CH(CH<sub>3</sub>)<sub>2</sub> & PCH), 3.19 (m, 1 H, CH(CH<sub>3</sub>)<sub>2</sub>), 3.04 (m, 1 H, NCH<sub>2</sub>), 2.08 (s, 1 H, PCH), 1.64 (d, 3 H, *J* = 6.90 Hz, CH(CH<sub>3</sub>)<sub>2</sub>), 1.60 (d, 3 H, *J* = 7.02 Hz, CH(CH<sub>3</sub>)<sub>2</sub>), 1.51 (d, 3 H, *J* = 6.90 Hz, CH(CH<sub>3</sub>)<sub>2</sub>), 1.41 (d, 3 H, *J* = 6.78 Hz, CH(CH<sub>3</sub>)<sub>2</sub>), 1.38 (d, 3 H, *J* = 6.90 Hz, CH(CH<sub>3</sub>)<sub>2</sub>), 1.37 (d, 3 H, *J* = 6.78 Hz, CH(CH<sub>3</sub>)<sub>2</sub>), 1.34 (d, 3 H, *J* = 6.84 Hz, CH(CH<sub>3</sub>)<sub>2</sub>), 1.30~1.28 (m, 6 H, CH(CH<sub>3</sub>)<sub>2</sub>), 1.27 (d, 6 H, *J* = 6.84 Hz, CH(CH<sub>3</sub>)<sub>2</sub>), 1.22 (t, 6 H, *J* = 7.08 Hz, CH(CH<sub>3</sub>)<sub>2</sub>), 1.15~1.12(m, 9 H, CH(CH<sub>3</sub>)<sub>2</sub>), 0.63, -0.11(s, 9 H, Si(CH<sub>3</sub>)<sub>3</sub>), -0.57(d, 1 H, <sup>2</sup>*J*<sub>PH</sub> = 27.97 Hz, P-CH-Si(CH<sub>3</sub>)<sub>3</sub>). <sup>13</sup>C NMR (151 MHz, C<sub>6</sub>D<sub>6</sub>): δ = 158.46 (NCN), 157.51 (NCN), 149.62 (C<sub>Ar</sub>), 149.31 (C<sub>Ar</sub>), 148.77 (C<sub>Ar</sub>), 148.70 (C<sub>Ar</sub>), 148.61 (C<sub>Ar</sub>), 148.05 (C<sub>Ar</sub>), 148.02 (C<sub>Ar</sub>), 138.65 (C<sub>Ar</sub>), 136.39 (C<sub>Ar</sub>), 128.72 (C<sub>Ar</sub>), 128.59 (C<sub>Ar</sub>), 128.55 (C<sub>Ar</sub>), 128.35 (C<sub>Ar</sub>), 128.14 (C<sub>Ar</sub>), 127.98 (C<sub>Ar</sub>), 125.06 (C<sub>Ar</sub>), 124.93 (C<sub>Ar</sub>), 124.83 (C<sub>Ar</sub>), 124.63 (C<sub>Ar</sub>), 124.28 (C<sub>Ar</sub>), 124.25 (C<sub>Ar</sub>), 124.22 (C<sub>Ar</sub>), 123.81 (C<sub>Ar</sub>), 115.80 (C<sub>Ar</sub>), 67.83 (dd, P-CH-C<sub>carbene</sub>), 61.33(dd, P-CH-C<sub>carbene</sub>), 51.93 (NCH<sub>2</sub>), 51.74 (NCH<sub>2</sub>), 50.54 (NCH<sub>2</sub>), 50.22 (NCH<sub>2</sub>), 29.28, 29.02, 28.89, 28.62, 28.59, 28.45, 28.40, 28.33, 25.96, 25.92, 25.72, 25.49, 25.46, 25.36, 25.32, 25.26, 25.00, 24.89, 24.78, 24.75, 24.43, 24.31, 24.18, 17.61, 1.89 (Si(CH<sub>3</sub>)<sub>3</sub>), 0.13 (CHSi(CH<sub>3</sub>)<sub>3</sub>). <sup>31</sup>P NMR (242.9 MHz,

$C_6D_6$ :  $\delta = -161.30$  (dd,  $^1J_{PP} = 158.32$  Hz,  $^2J_{PH} = 29.36$  Hz),  $-181.87$  (d,  $^1J_{PP} = 158.32$  Hz). UV/Vis (THF,  $\lambda$  (nm)  $\epsilon$  ( $M^{-1}cm^{-1}$ )): 332 (23783.2). HRMS (ESI,  $m/z$ ) calc. for:  $C_{60}H_{89}N_4P_2Si$ : 955.6326.  $[M + H]^+$ ; found: 955.6585.

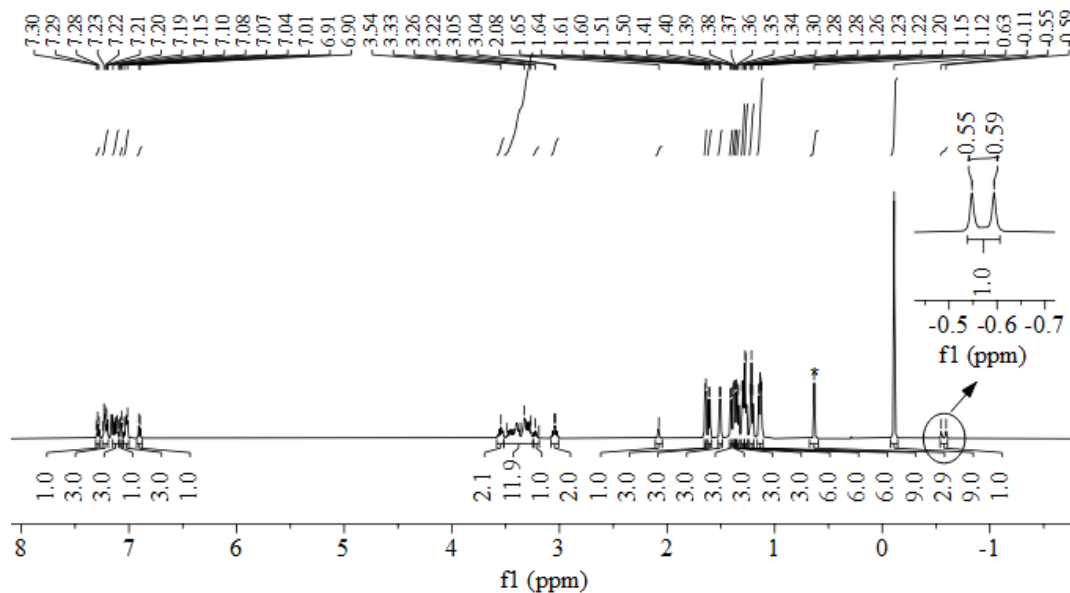

Figure S45.  $^1H$  NMR spectrum of **4** in  $C_6D_6$ .

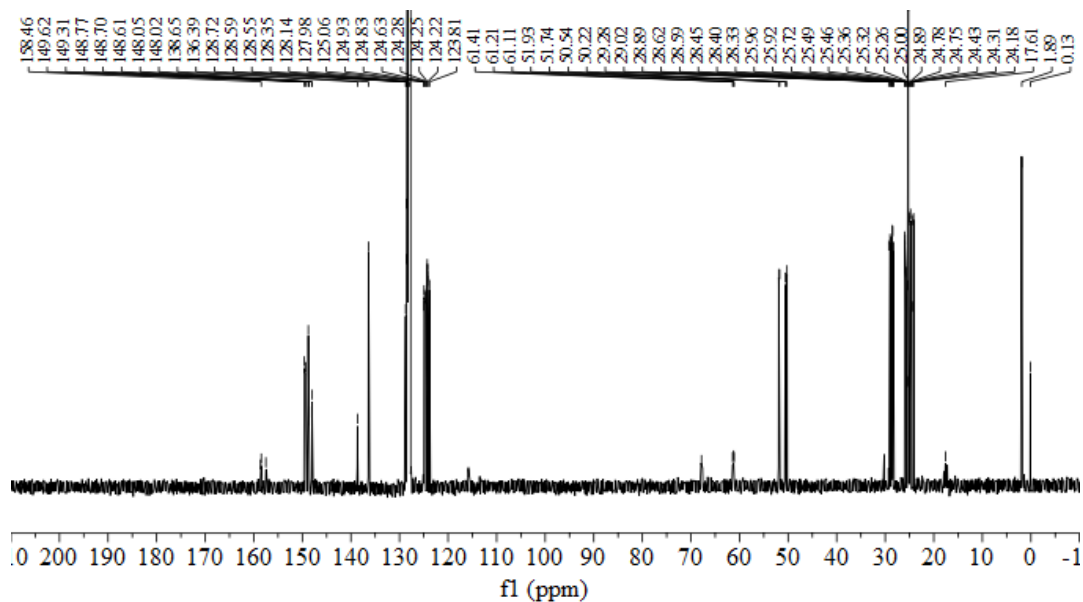

Figure S46.  $^{13}C$   $\{^1H\}$  NMR spectrum of **4** in  $C_6D_6$ .



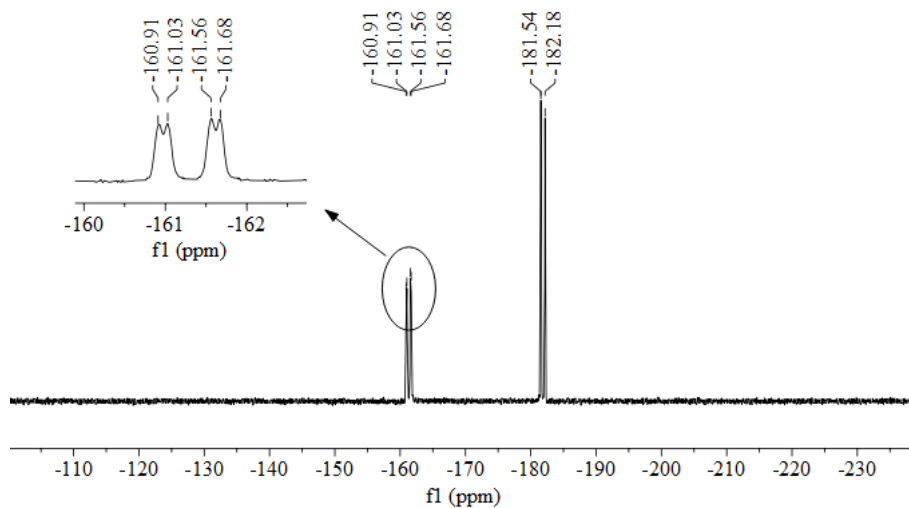

**Figure S47.**  $^{31}\text{P}$  NMR spectrum of **4** in  $\text{C}_6\text{D}_6$ .

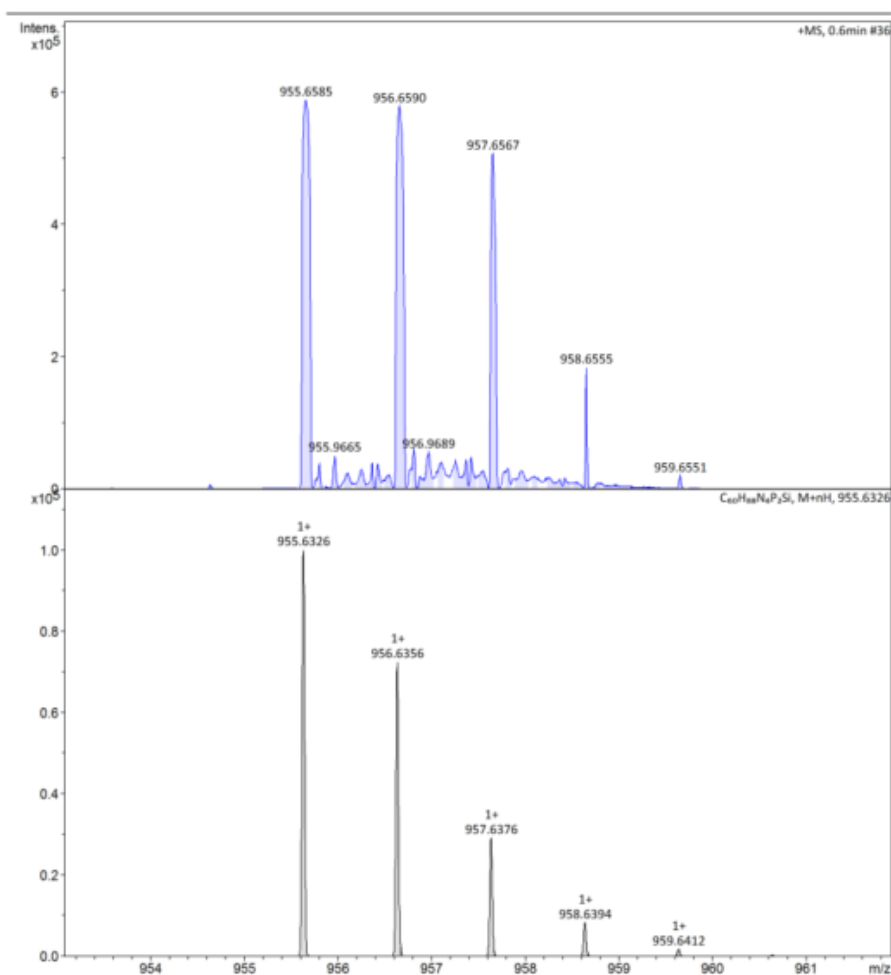

**Figure S48.** HRMS of **4**.

**The reaction of Z-2b with (Trimethylsilyl)diazomethane:**

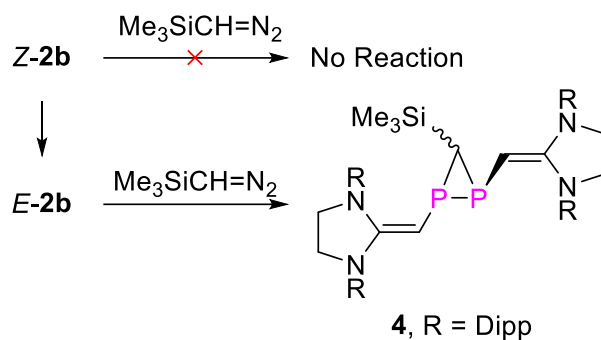

A drop of (Trimethylsilyl)diazomethane (2M in hexane) was added in the solution of Z-2b (10 mg) in C<sub>6</sub>D<sub>6</sub> (0.4 mL). The <sup>31</sup>P NMR monitoring shows below:

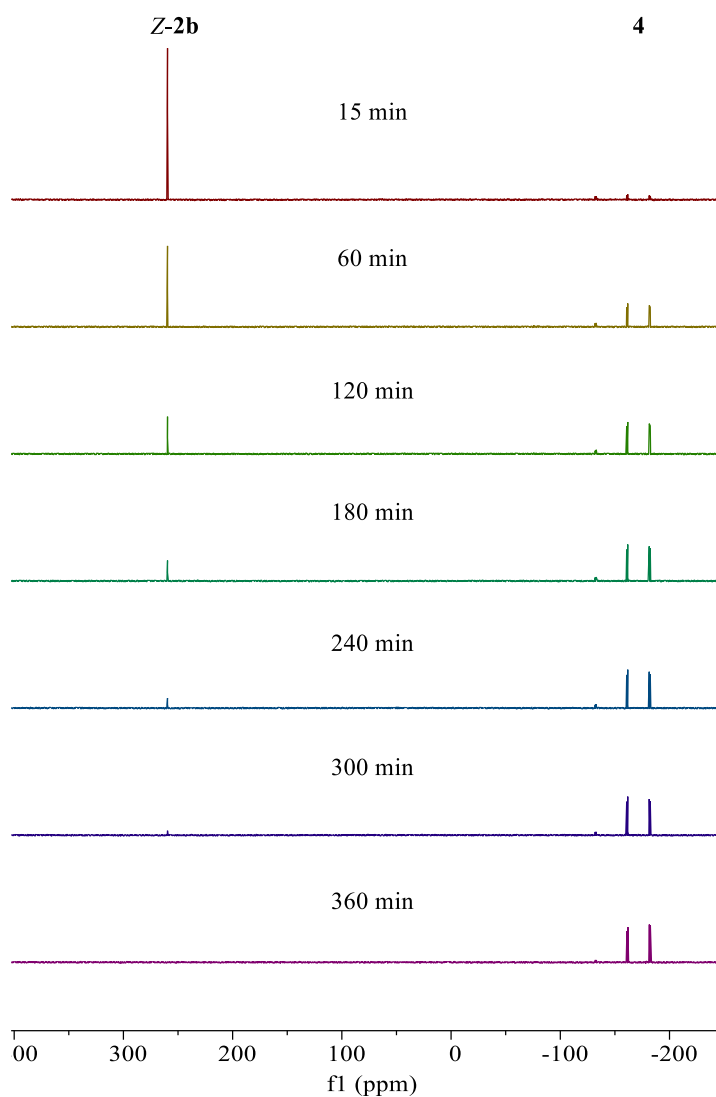

**Figure S49.** <sup>31</sup>P{<sup>1</sup>H} NMR spectra monitoring of the reaction of Z-2b with (Trimethylsilyl)diazomethane in C<sub>6</sub>D<sub>6</sub>.

## S2: UV-Vis spectral studies.

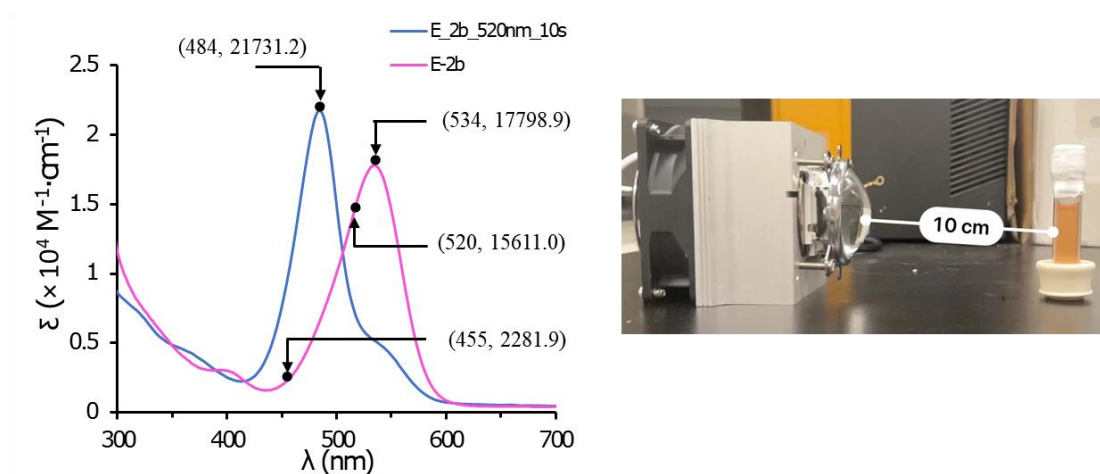

**Figure S50.** The UV-Vis spectra the toluene solution of *E-2b* (red), and after irradiated with LED light (520nm) for 10s. No apparent changes were observed after elongated irradiation.

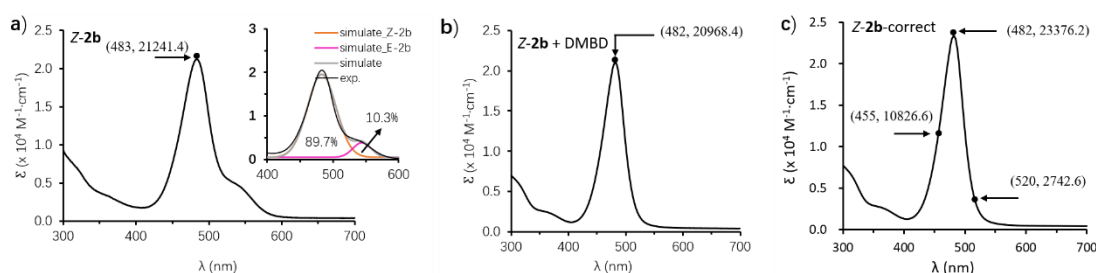

**Figure S51.** The UV-Vis spectra of a) the toluene solution of *Z-2b*, which always contain about 10% *E-2b*; b) this contamination of *E-2b* can be removed via add 0.24 equivalent of DMBD which is known to react with *E-2b* but not with *Z-2b*. Indeed, no apparent decrease of the absorption intensity was observed; c) thus the genuine absorption intensity of *Z-2b* could be obtained via the absorption intensity of [*Z-2b* + DMBD]/0.897.

## S3: Kinetic and thermodynamic studies.

**General method for Determination of Rate Orders:** The order of dependence of each component of the reaction was determined by the method of initial rates. The reaction

was examined by plots of rate constant  $k$  against varying concentrations of *E-2b* or *Z-2b*.

**The *Z-2b* to *E-2b* isomerization irradiated at 455 nm:** *Z-2b* and internal standard hexamethylenetetramine were dissolved in  $C_6D_6$  and loaded in a dried J-Young NMR tube under nitrogen atmosphere at room temperature in dark. The reaction was monitored by NMR spectroscopy every 0.5 minutes under irradiation at 455 nm. According to the integration of reactant *Z-2b*, the concentration of *Z-2b* was plotted against time to determine  $k$  value. Based on results below, the reaction is determined to be first order.

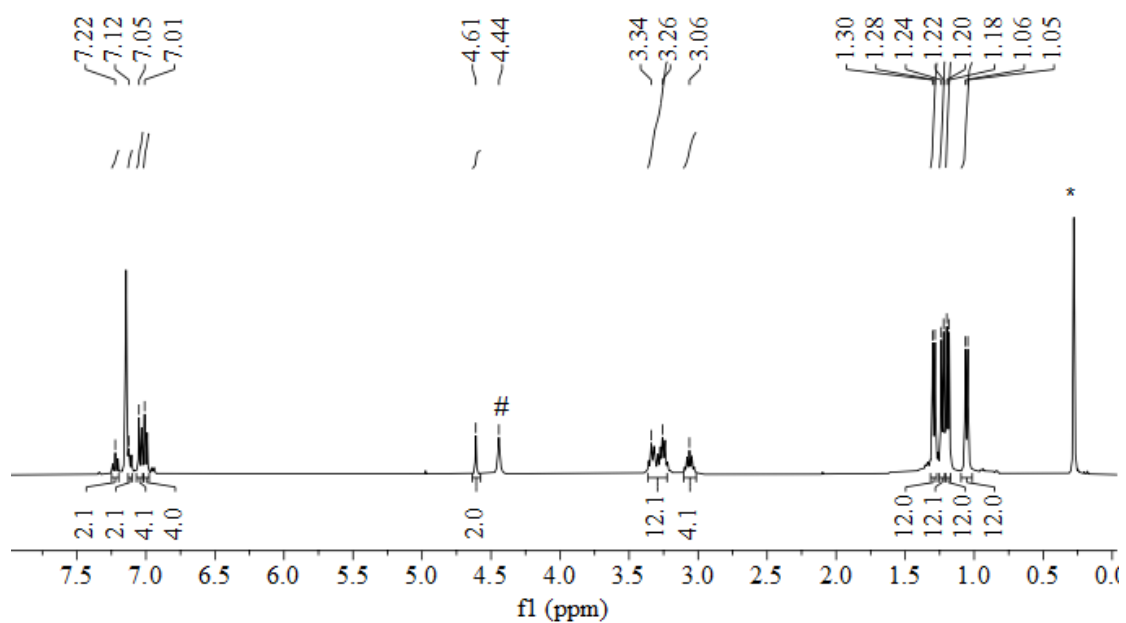

**Figure S52.**  $^1H$  NMR of *Z-2b* and hexamethylenetetramine in  $C_6D_6$ .  
#hexamethylenetetramine. \*Silicon grease.

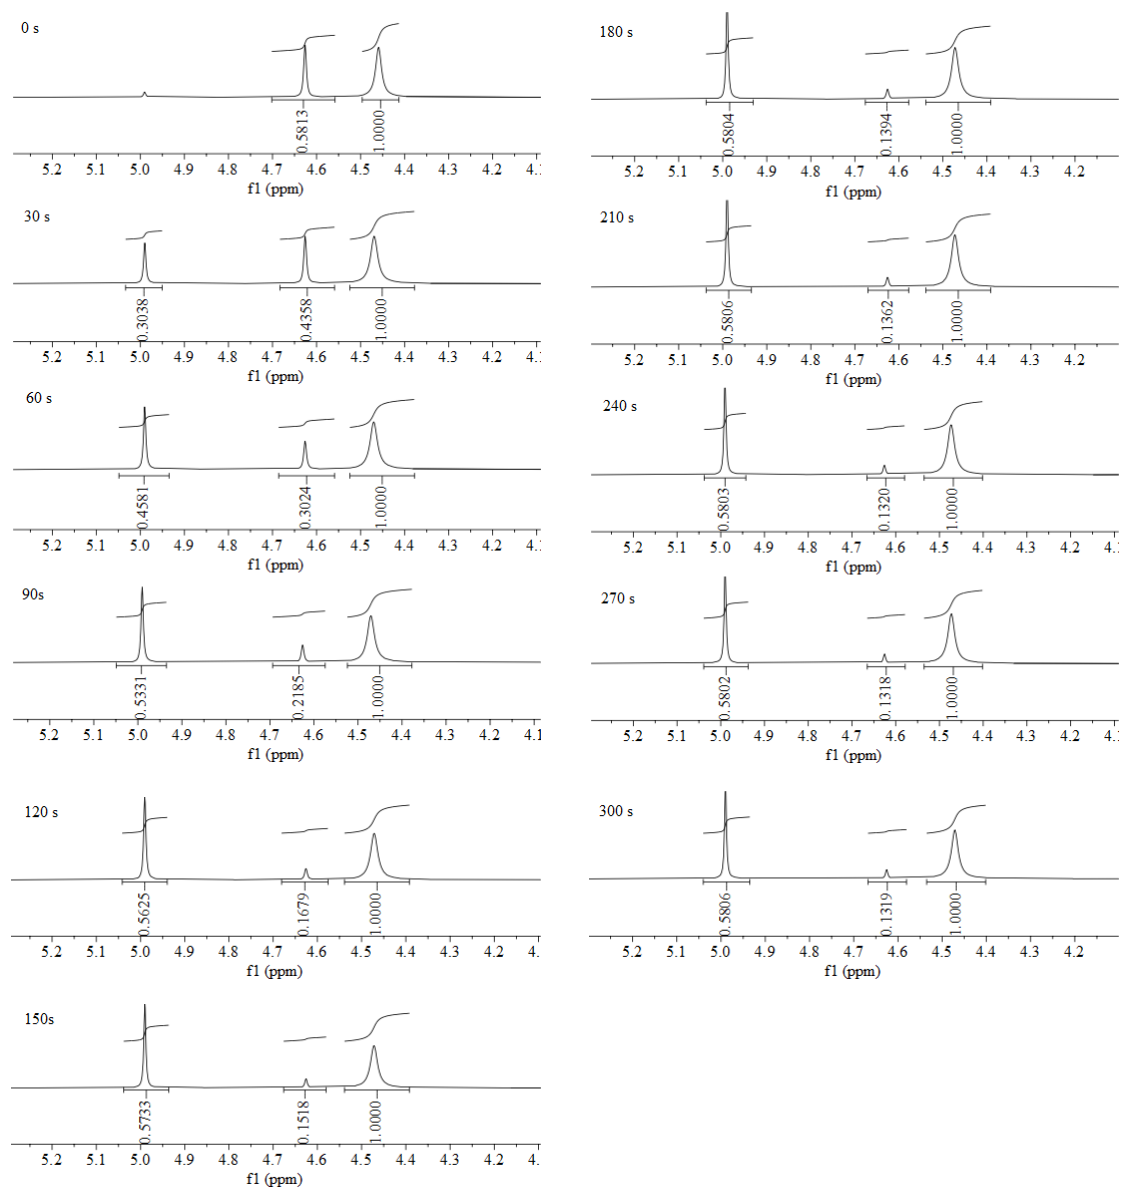

**Figure S53.**  $^1\text{H}$  NMR spectroscopic monitoring of the **Z-2b** to **E-2b** isomerization irradiated at 455 nm in  $\text{C}_6\text{D}_6$ .

**Table S1.** The **Z-2b** to **E-2b** isomerization irradiated at 455 nm in  $\text{C}_6\text{D}_6$ .

| t (s) | integration $\int_{E-2b}$ | integration $\int_{Z-2b}$ | [ <b>E-2b</b> ] ( $\text{mol}\cdot\text{L}^{-1}$ ) | [ <b>Z-2b</b> ] ( $\text{mol}\cdot\text{L}^{-1}$ ) | $\ln[\text{E-2b}]$ | $\ln[\text{Z-2b}]$ |
|-------|---------------------------|---------------------------|----------------------------------------------------|----------------------------------------------------|--------------------|--------------------|
| 0     | 0.0000                    | 0.5813                    | 0.000000                                           | 0.020733                                           | -                  | -3.876049          |
| 30    | 0.3038                    | 0.4358                    | 0.010835                                           | 0.015543                                           | -4.524946          | -4.164133          |
| 60    | 0.4581                    | 0.3024                    | 0.016339                                           | 0.010785                                           | -4.114229          | -4.529565          |
| 90    | 0.5331                    | 0.2185                    | 0.019013                                           | 0.007793                                           | -3.962607          | -4.854530          |
| 120   | 0.5625                    | 0.1679                    | 0.020062                                           | 0.005988                                           | -3.908925          | -5.117947          |

|     |        |        |          |          |           |           |
|-----|--------|--------|----------|----------|-----------|-----------|
| 150 | 0.5733 | 0.1518 | 0.020447 | 0.005414 | -3.889907 | -5.218752 |
| 180 | 0.5804 | 0.1384 | 0.020700 | 0.004936 | -3.877598 | -5.311168 |
| 210 | 0.5806 | 0.1362 | 0.020708 | 0.004858 | -3.877254 | -5.327192 |
| 240 | 0.5803 | 0.1320 | 0.020697 | 0.004708 | -3.877771 | -5.358514 |
| 270 | 0.5802 | 0.1318 | 0.020693 | 0.004701 | -3.877943 | -5.360030 |
| 300 | 0.5806 | 0.1319 | 0.020708 | 0.004704 | -3.877254 | -5.359272 |

---

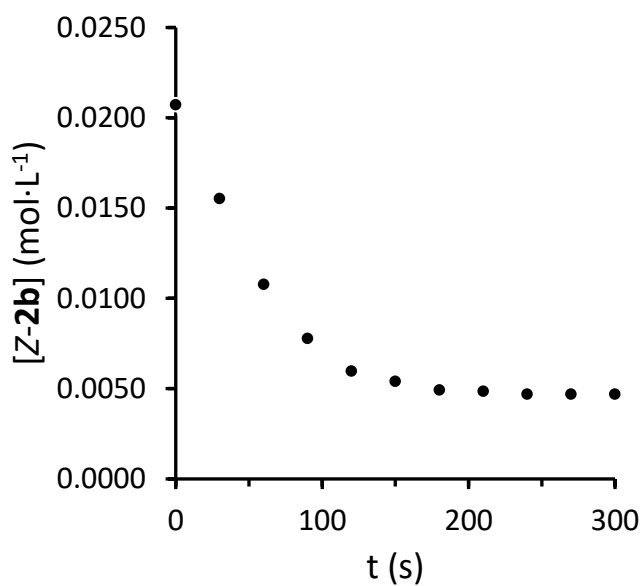

*Figure S54.* Kinetic curve.

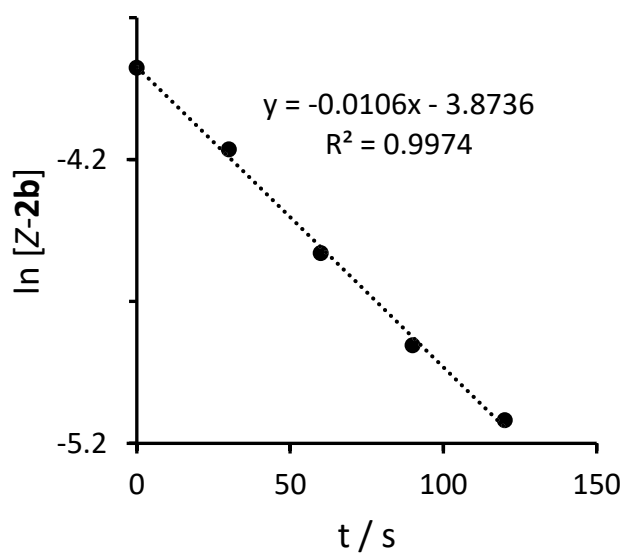

*Figure S55.* First order treatment of the kinetic curve.

**The *E-2b* to *Z-2b* isomerization irradiated at 520 nm:** *E-2b* and internal standard hexamethylenetetramine were dissolved in C<sub>6</sub>D<sub>6</sub> and loaded in a dried J-Young NMR tube under nitrogen atmosphere at room temperature in dark. The reaction was monitored by NMR spectroscopy every 0.5 minutes to every 1 minutes under irradiation at 520nm. According to the integration of reactant *E-2b*, the concentration of *E-2b* was plotted against time to determine k value. Based on results below, the reaction is determined to be first order.

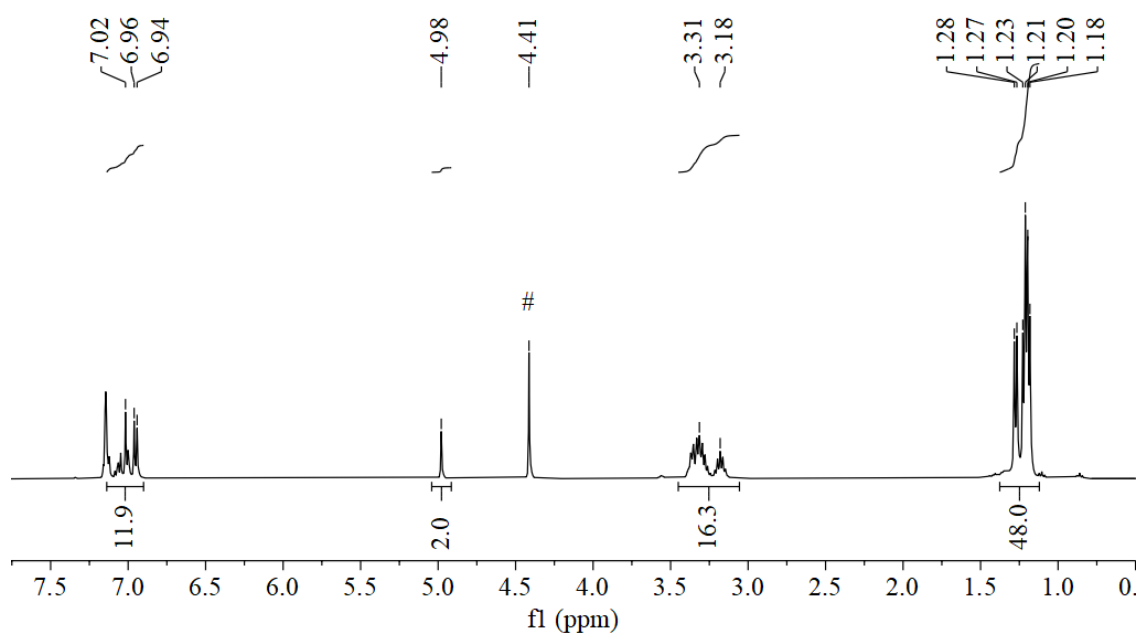

**Figure S56.** <sup>1</sup>H NMR of *E-2b* and hexamethylenetetramine in C<sub>6</sub>D<sub>6</sub>.  
#hexamethylenetetramine.

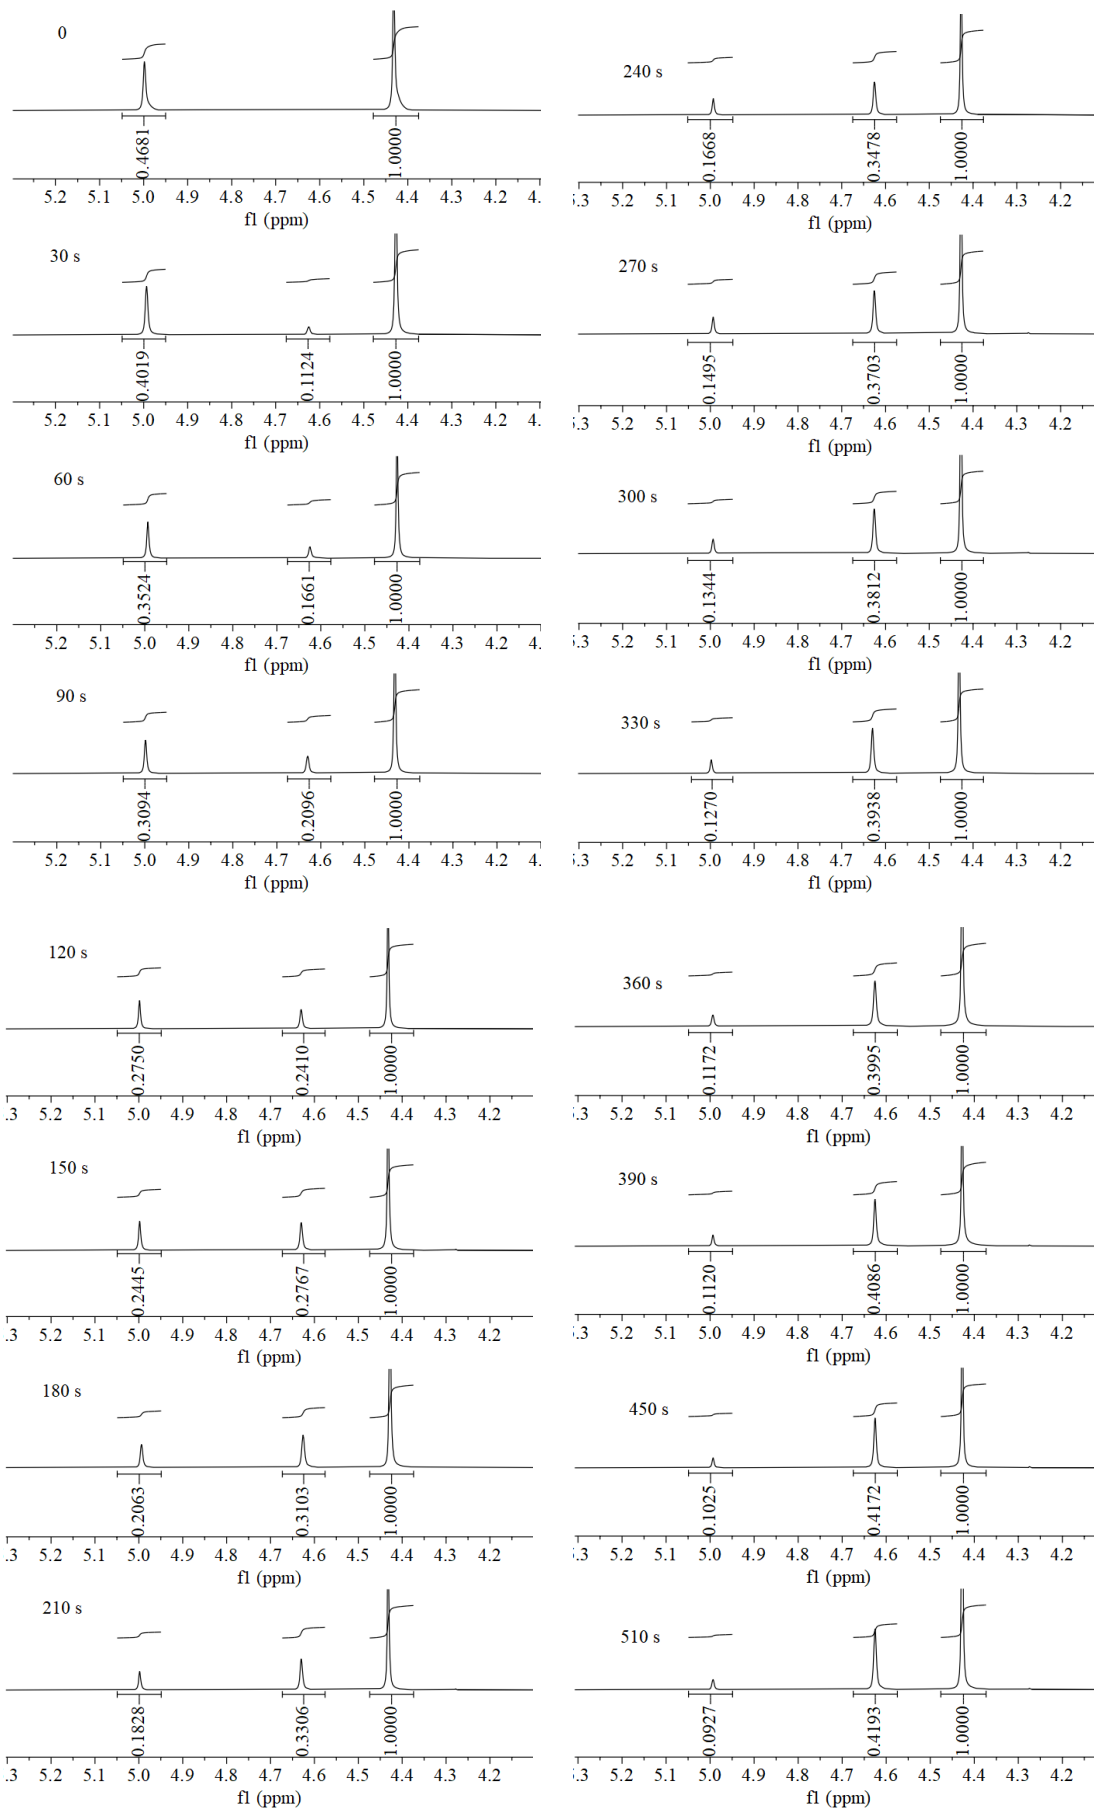



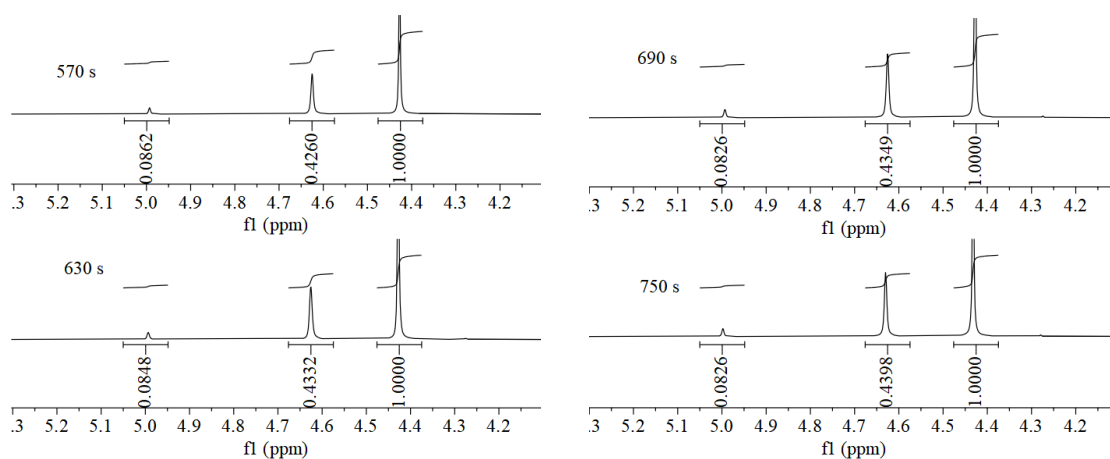

**Figure S57.**  $^1\text{H}$  NMR spectroscopic monitoring of the *E-2b* to *Z-2b* isomerization irradiated at 520 nm in  $\text{C}_6\text{D}_6$ .

**Table S2.** The *E-2b* to *Z-2b* isomerization irradiated at 520 nm in  $\text{C}_6\text{D}_6$ .

| t (s) | integration $\int_{E-2b}$ | integration $\int_{Z-2b}$ | [ <i>E-2b</i> ] (mol·L <sup>-1</sup> ) | [ <i>Z-2b</i> ] (mol·L <sup>-1</sup> ) | ln[ <i>E-2b</i> ] | ln[ <i>Z-2b</i> ] |
|-------|---------------------------|---------------------------|----------------------------------------|----------------------------------------|-------------------|-------------------|
| 0     | 0.4681                    | 0.0000                    | 0.020034                               | 0.000000                               | -3.910313         | -                 |
| 30    | 0.4019                    | 0.1124                    | 0.017201                               | 0.004811                               | -4.062791         | -5.336931         |
| 60    | 0.3524                    | 0.1661                    | 0.015082                               | 0.007109                               | -4.194228         | -4.946404         |
| 90    | 0.3094                    | 0.2096                    | 0.013242                               | 0.008971                               | -4.324360         | -4.713794         |
| 120   | 0.2750                    | 0.2410                    | 0.011770                               | 0.010315                               | -4.442223         | -4.574198         |
| 150   | 0.2445                    | 0.2767                    | 0.010464                               | 0.011842                               | -4.559779         | -4.436061         |
| 180   | 0.2063                    | 0.3103                    | 0.008829                               | 0.013281                               | -4.729663         | -4.321455         |
| 210   | 0.1828                    | 0.3306                    | 0.007824                               | 0.014149                               | -4.850602         | -4.258085         |
| 240   | 0.1668                    | 0.3478                    | 0.007139                               | 0.014886                               | -4.942199         | -4.207367         |
| 270   | 0.1495                    | 0.3703                    | 0.006398                               | 0.015848                               | -5.051698         | -4.144681         |
| 300   | 0.1344                    | 0.3812                    | 0.005752                               | 0.016315                               | -5.158174         | -4.115670         |
| 330   | 0.1270                    | 0.3938                    | 0.005435                               | 0.016854                               | -5.214807         | -4.083151         |
| 360   | 0.1172                    | 0.3995                    | 0.005016                               | 0.017098                               | -5.295113         | -4.068781         |
| 390   | 0.1120                    | 0.4086                    | 0.004793                               | 0.017488                               | -5.340496         | -4.046258         |
| 450   | 0.1025                    | 0.4172                    | 0.004387                               | 0.017856                               | -5.429132         | -4.025429         |
| 510   | 0.0927                    | 0.4193                    | 0.003967                               | 0.017946                               | -5.529626         | -4.020408         |
| 570   | 0.0862                    | 0.4260                    | 0.003689                               | 0.018232                               | -5.602324         | -4.004555         |
| 630   | 0.0848                    | 0.4332                    | 0.003629                               | 0.018541                               | -5.618699         | -3.987795         |
| 690   | 0.0826                    | 0.4349                    | 0.003535                               | 0.018613                               | -5.644985         | -3.983878         |

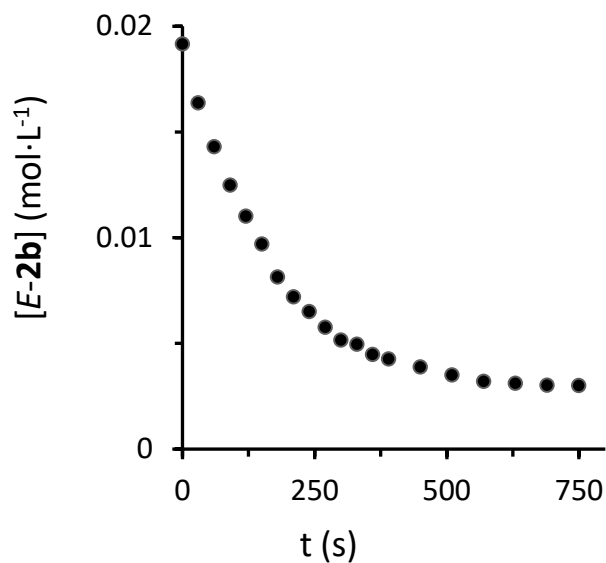

Figure S58. Kinetic curve.

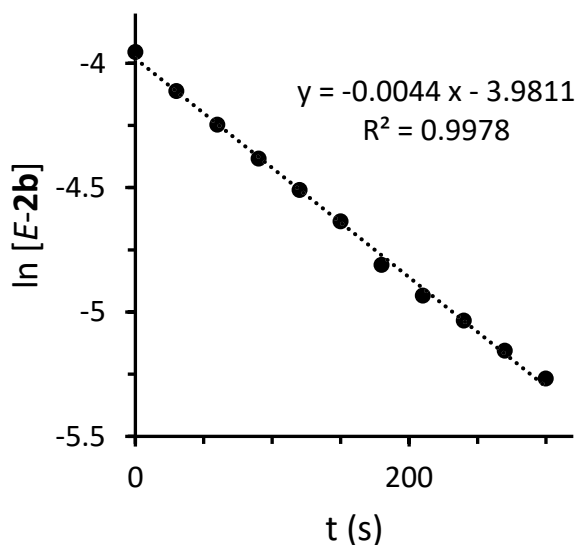

Figure S59. First order treatment of the kinetic curve.

**The Z-2b to E-2b isomerization at 348.15 K:** Z-2b and internal standard hexamethylenetetramine were dissolved in *p*-Xylene-d<sub>10</sub> and loaded in a dried J-Young NMR tube under nitrogen atmosphere at room temperature. The reaction was monitored by NMR spectroscopy every 50 seconds to every 110 seconds at 348.15 K. According to the integration of reactant Z-2b, the concentration of Z-2b was plotted against time

to determine k value. Based on results below, the reactions are determined to be first order.

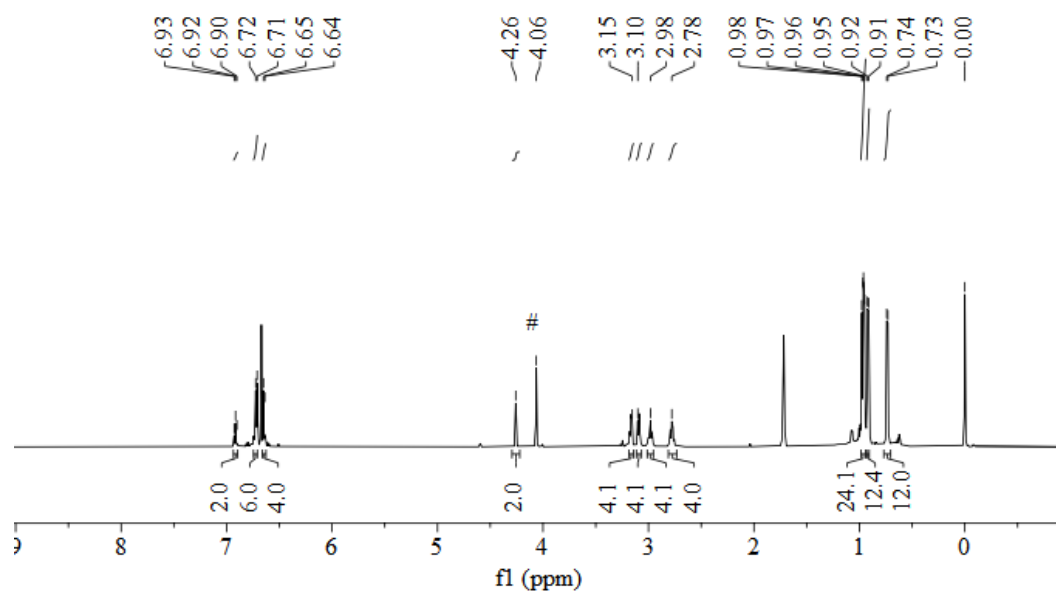

**Figure S60.**  $^1\text{H}$  NMR spectrum of **Z-2b** and hexamethylenetetramine in *p*-Xylene- $d_{10}$ .

#hexamethylenetetramine.

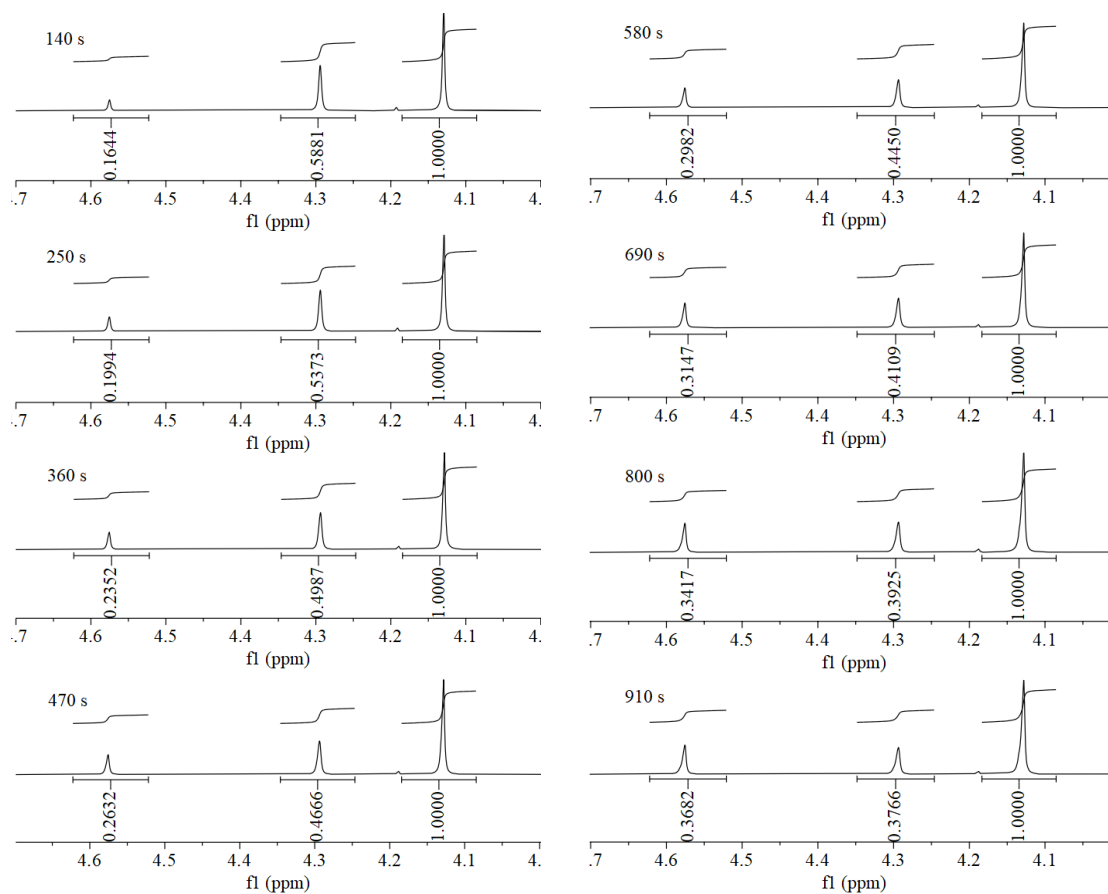

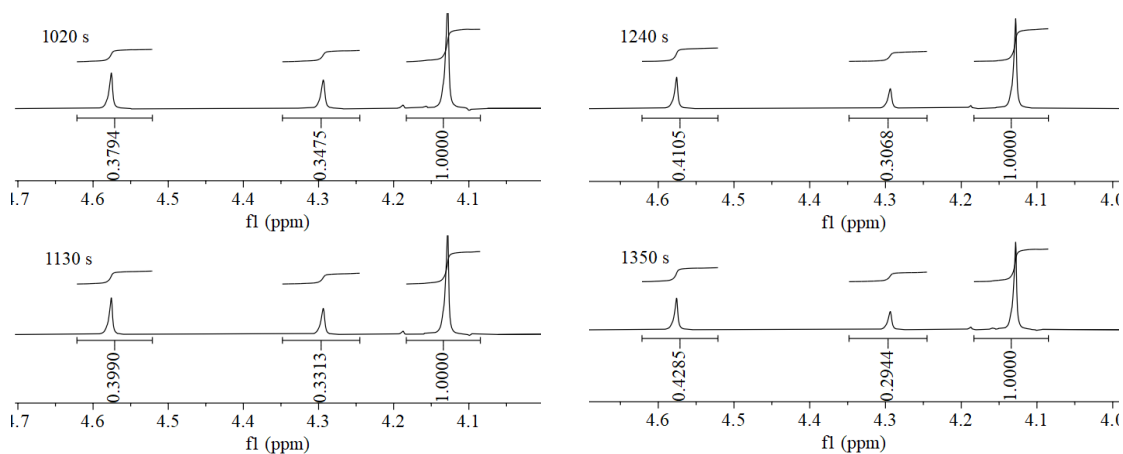

**Figure S61.**  $^1\text{H}$  NMR spectroscopic monitoring of the **Z-2b** to **E-2b** isomerization at 348.15 K in *p*-Xylene- $d_{10}$ .

**Table S4.** The **Z-2b** to **E-2b** isomerization at 348.15 K in *p*-Xylene- $d_{10}$ .

| T<br>(s) | integration<br>$\int_{E-2b}$ | integration<br>$\int_{Z-2b}$ | [ <b>E-2b</b> ]<br>( $\text{mol}\cdot\text{L}^{-1}$ ) | [ <b>Z-2b</b> ]<br>( $\text{mol}\cdot\text{L}^{-1}$ ) | $\ln[\text{E-2b}]$ | $\ln[\text{Z-2b}]$ |
|----------|------------------------------|------------------------------|-------------------------------------------------------|-------------------------------------------------------|--------------------|--------------------|
| 140      | 0.1643                       | 0.5881                       | 0.006329                                              | 0.022653                                              | -5.062661          | -3.787458          |
| 250      | 0.1994                       | 0.5373                       | 0.007681                                              | 0.020696                                              | -4.869042          | -3.877798          |
| 360      | 0.2352                       | 0.4987                       | 0.009060                                              | 0.019210                                              | -4.703919          | -3.952350          |
| 470      | 0.2632                       | 0.4666                       | 0.010138                                              | 0.017973                                              | -4.591441          | -4.018883          |
| 580      | 0.2982                       | 0.4450                       | 0.011486                                              | 0.017141                                              | -4.466591          | -4.066281          |
| 690      | 0.3147                       | 0.4109                       | 0.012122                                              | 0.015828                                              | -4.412735          | -4.146005          |
| 800      | 0.3417                       | 0.3925                       | 0.013162                                              | 0.015119                                              | -4.330422          | -4.191818          |
| 910      | 0.3682                       | 0.3766                       | 0.014183                                              | 0.014506                                              | -4.255729          | -4.233171          |
| 1020     | 0.3794                       | 0.3475                       | 0.014614                                              | 0.013385                                              | -4.225764          | -4.313590          |
| 1130     | 0.3990                       | 0.3313                       | 0.015369                                              | 0.012761                                              | -4.175394          | -4.361331          |
| 1240     | 0.4105                       | 0.3068                       | 0.015812                                              | 0.011818                                              | -4.146979          | -4.438159          |
| 1350     | 0.4285                       | 0.2944                       | 0.016505                                              | 0.011340                                              | -4.104064          | -4.479416          |

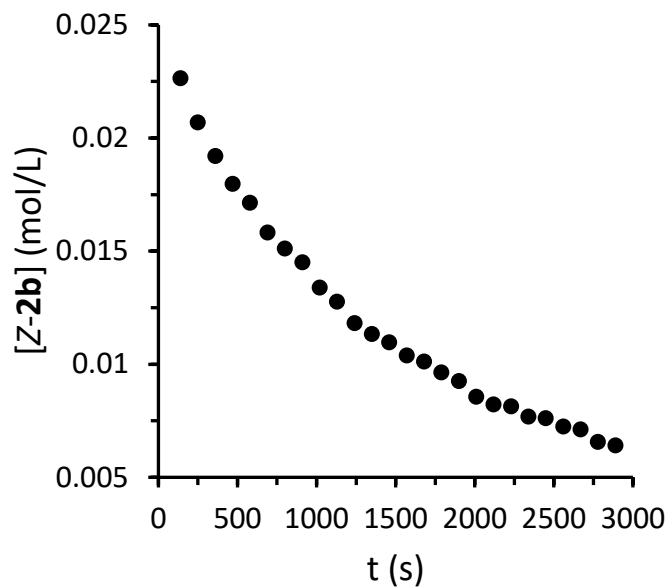

**Figure S62.** Kinetic curve.

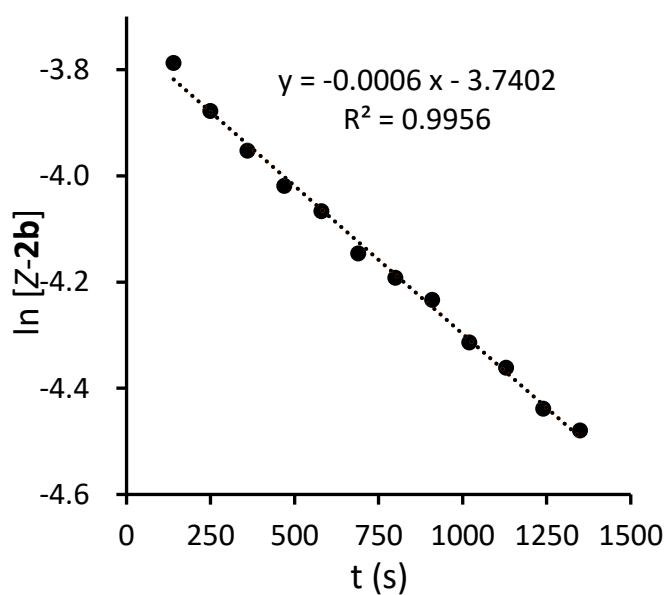

**Figure S63.** First order treatment of the kinetic curve.

**General method for Eyring Plot:** Compound **Z-2b** (0.020 g, 0.0297 mmol) and internal standard hexamethylenetetramine (2mg) were dissolved in *p*-Xylene- $d_{10}$  (5 mL), the mixture was loaded into a dried J-Young NMR tube and sealed. The reaction was monitored from every 50 seconds to every 110 seconds over a range of temperature from 348.15 K to 373.15 K. Based on the integration of **Z-2b**, the concentration of **Z-2b** was plotted against time, which follows a pseudo-first order kinetic. The data of

$\ln[E-2b]$  was plotted against time to determine  $k$  value. The Eyring Plot was also obtained based on the rate at each temperature and plotted against inverse of temperature.

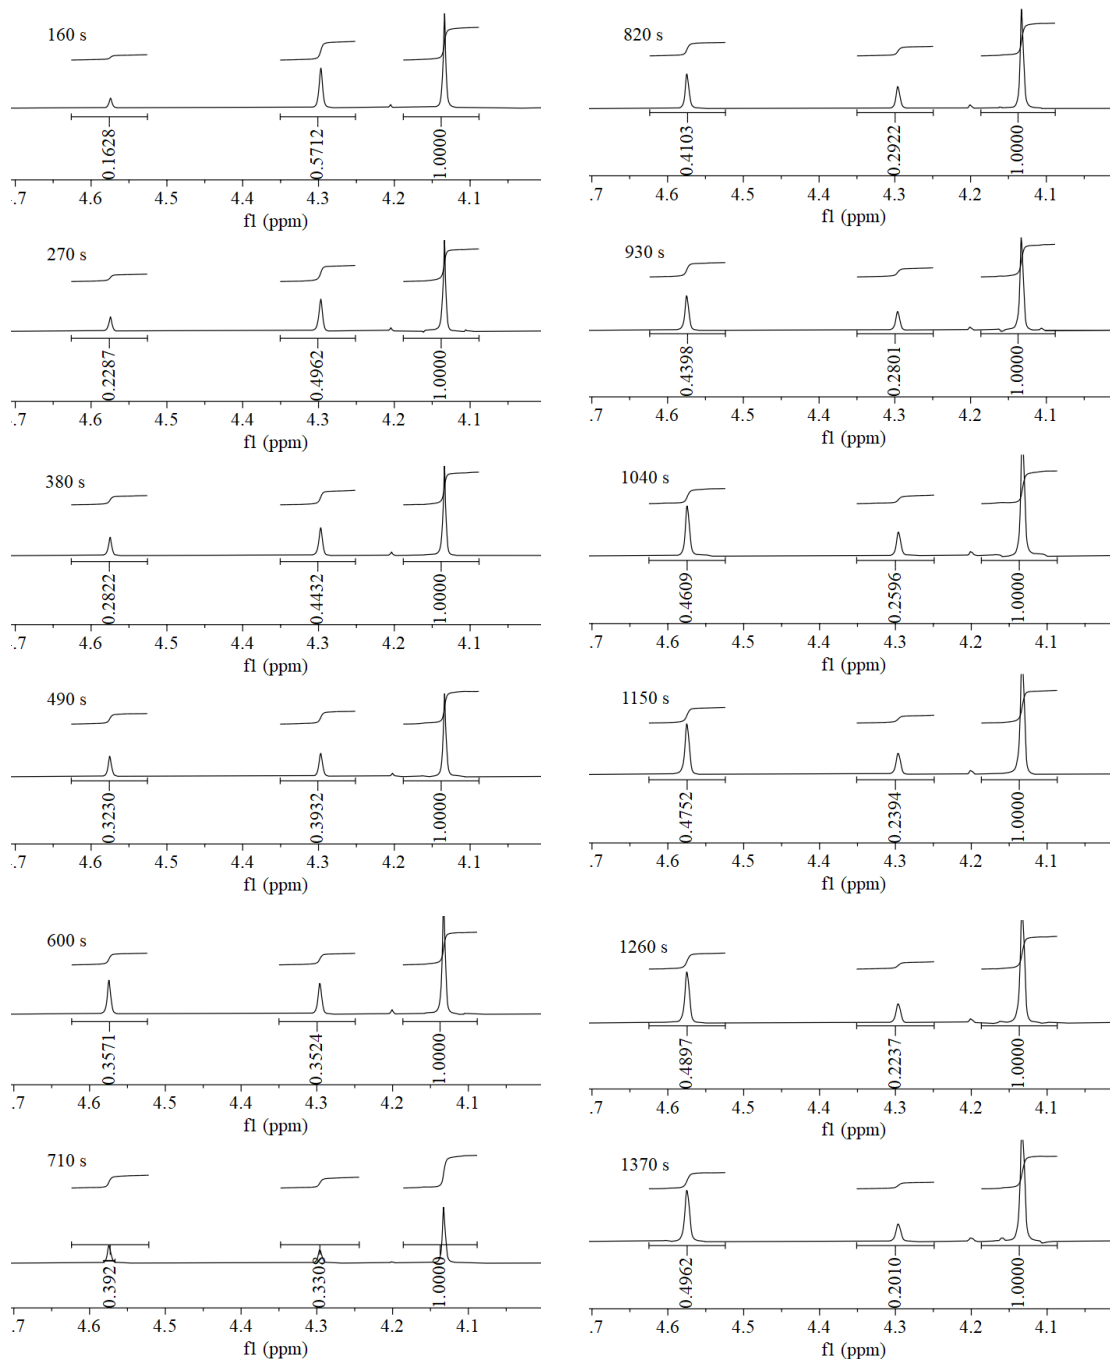

**Figure S64.**  $^1\text{H}$  NMR of the *Z-2b* to *E-2b* isomerization at 353.15 K in *p*-Xylene- $d_{10}$ .

**Table S5.** The table of the *Z-2b* to *E-2b* isomerization at 353.15 K in *p*-Xylene-*d*<sub>10</sub>.

| t (s) | integration<br>$\int_{E-2b}$ | integration<br>$\int_{Z-2b}$ | [ <i>E-2b</i> ]<br>(mol·L <sup>-1</sup> ) | [ <i>Z-2b</i> ]<br>(mol·L <sup>-1</sup> ) | ln[ <i>E-2b</i> ] | ln[ <i>Z-2b</i> ] |
|-------|------------------------------|------------------------------|-------------------------------------------|-------------------------------------------|-------------------|-------------------|
| 160   | 0.1628                       | 0.5712                       | 0.006271                                  | 0.022002                                  | -5.071832         | -3.816616         |
| 270   | 0.2287                       | 0.4962                       | 0.008809                                  | 0.019113                                  | -4.731944         | -3.957376         |
| 380   | 0.2822                       | 0.4432                       | 0.010870                                  | 0.017072                                  | -4.521739         | -4.070334         |
| 490   | 0.3230                       | 0.3932                       | 0.012442                                  | 0.015146                                  | -4.386703         | -4.190037         |
| 600   | 0.3571                       | 0.3524                       | 0.013755                                  | 0.013574                                  | -4.286339         | -4.299588         |
| 710   | 0.3921                       | 0.3308                       | 0.015103                                  | 0.012742                                  | -4.192838         | -4.362841         |
| 820   | 0.4103                       | 0.2922                       | 0.015804                                  | 0.011255                                  | -4.147466         | -4.486916         |
| 930   | 0.4398                       | 0.2801                       | 0.016941                                  | 0.010789                                  | -4.078035         | -4.529208         |
| 1040  | 0.4609                       | 0.2596                       | 0.017753                                  | 0.010000                                  | -4.031174         | -4.605213         |
| 1150  | 0.4752                       | 0.2394                       | 0.018304                                  | 0.009221                                  | -4.000619         | -4.686219         |
| 1260  | 0.4897                       | 0.2237                       | 0.018863                                  | 0.008617                                  | -3.970562         | -4.754049         |
| 1370  | 0.4962                       | 0.2010                       | 0.019113                                  | 0.007742                                  | -3.957376         | -4.861050         |

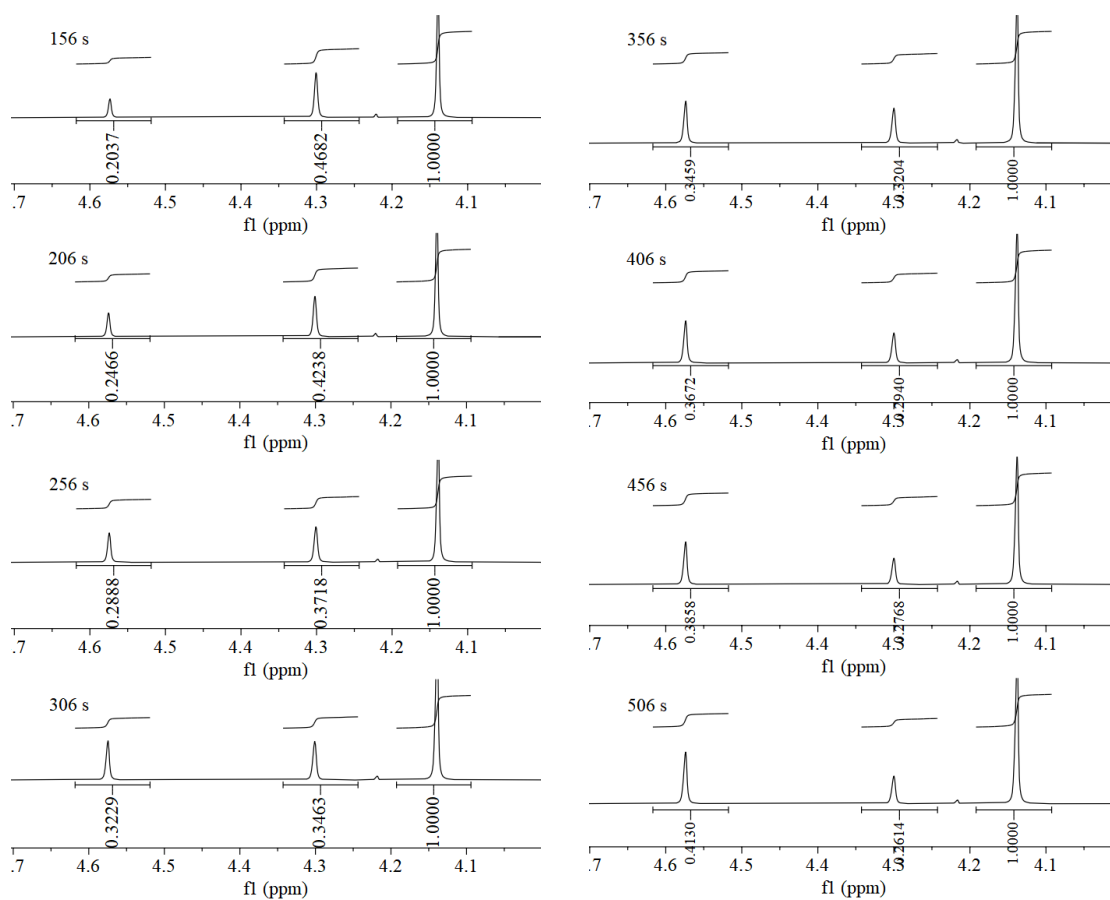

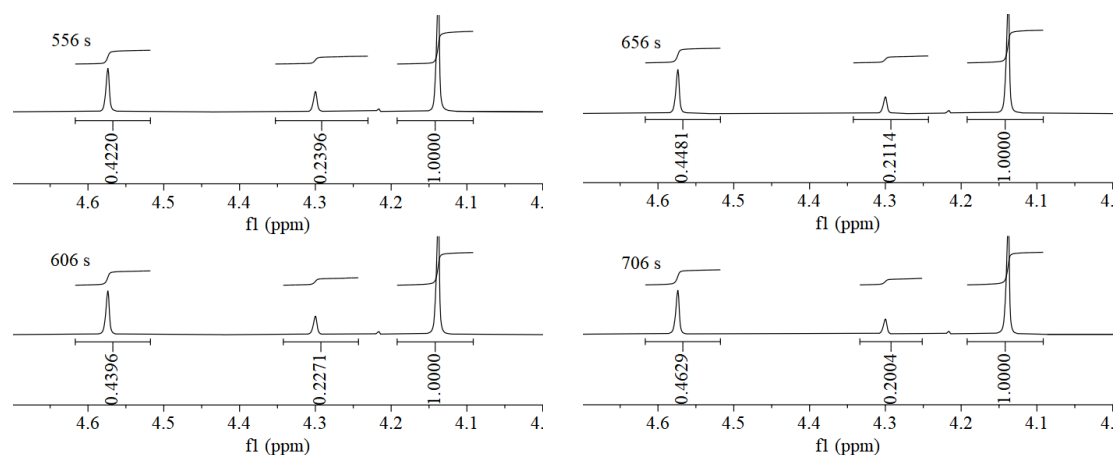

**Figure S65.**  $^1\text{H}$  NMR spectroscopic monitoring of the *Z-2b* to *E-2b* isomerization at 358.15 K in *p*-Xylene- $d_{10}$ .

**Table S6.** The table of the *Z-2b* to *E-2b* isomerization at 358.15 K in *p*-Xylene- $d_{10}$ .

| t (s) | integration<br>$\int_{E-2b}$ | integration<br>$\int_{Z-2b}$ | [ <i>E-2b</i> ]<br>( $\text{mol}\cdot\text{L}^{-1}$ ) | [ <i>Z-2b</i> ]<br>( $\text{mol}\cdot\text{L}^{-1}$ ) | $\ln[E-2b]$ | $\ln[Z-2b]$ |
|-------|------------------------------|------------------------------|-------------------------------------------------------|-------------------------------------------------------|-------------|-------------|
| 156   | 0.2037                       | 0.4682                       | 0.007846                                              | 0.018035                                              | -4.847707   | -4.015459   |
| 206   | 0.2466                       | 0.4238                       | 0.009499                                              | 0.016324                                              | -4.656587   | -4.115093   |
| 256   | 0.2888                       | 0.3718                       | 0.011124                                              | 0.014321                                              | -4.498621   | -4.245999   |
| 306   | 0.3229                       | 0.3464                       | 0.012438                                              | 0.013343                                              | -4.387012   | -4.316761   |
| 356   | 0.3459                       | 0.3204                       | 0.013324                                              | 0.012342                                              | -4.318205   | -4.394785   |
| 406   | 0.3672                       | 0.2940                       | 0.014144                                              | 0.011325                                              | -4.258448   | -4.480775   |
| 456   | 0.3858                       | 0.2768                       | 0.014861                                              | 0.010662                                              | -4.209036   | -4.541060   |
| 506   | 0.4130                       | 0.2614                       | 0.015908                                              | 0.010069                                              | -4.140907   | -4.598303   |
| 556   | 0.4220                       | 0.2396                       | 0.016255                                              | 0.009229                                              | -4.119350   | -4.685384   |
| 606   | 0.4396                       | 0.2271                       | 0.016933                                              | 0.008748                                              | -4.078490   | -4.738964   |
| 656   | 0.4484                       | 0.2114                       | 0.017272                                              | 0.008143                                              | -4.058669   | -4.810603   |
| 706   | 0.4629                       | 0.2004                       | 0.017831                                              | 0.007719                                              | -4.026844   | -4.864040   |



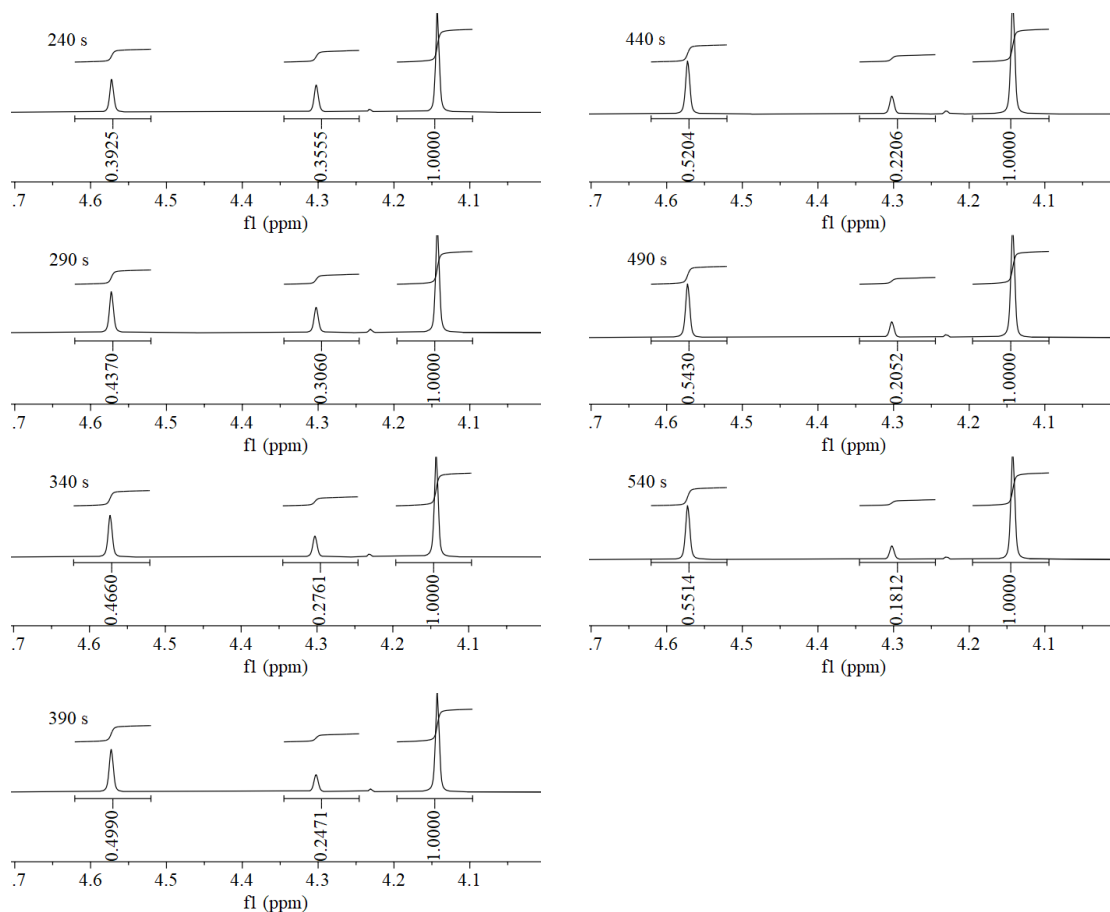

**Figure S66.** The  $^1\text{H}$  NMR spectroscopic monitoring the **Z-2b** to **E-2b** isomerization at 363.15 K in *p*-Xylene- $d_{10}$ .

**Table S7.** The table of the **Z-2b** to **E-2b** isomerization at 363.15 K in *p*-Xylene- $d_{10}$ .

| t (s) | integration<br>$\int_{E-2b}$ | integration<br>$\int_{Z-2b}$ | [ <b>E-2b</b> ]<br>(mol·L $^{-1}$ ) | [ <b>Z-2b</b> ]<br>(mol·L $^{-1}$ ) | ln[ <b>E-2b</b> ] | ln[ <b>Z-2b</b> ] |
|-------|------------------------------|------------------------------|-------------------------------------|-------------------------------------|-------------------|-------------------|
| 240   | 0.3925                       | 0.3555                       | 0.015119                            | 0.013694                            | -4.191818         | -4.290830         |
| 290   | 0.4370                       | 0.3060                       | 0.016833                            | 0.011787                            | -4.084422         | -4.440770         |
| 340   | 0.4660                       | 0.2761                       | 0.017950                            | 0.010635                            | -4.020169         | -4.543592         |
| 390   | 0.4990                       | 0.2471                       | 0.019221                            | 0.009518                            | -3.951749         | -4.654562         |
| 440   | 0.5204                       | 0.2206                       | 0.020045                            | 0.008497                            | -3.909757         | -4.768004         |
| 490   | 0.5430                       | 0.2052                       | 0.020916                            | 0.007904                            | -3.867246         | -4.840370         |
| 540   | 0.5514                       | 0.1812                       | 0.021239                            | 0.006980                            | -3.851894         | -4.964754         |

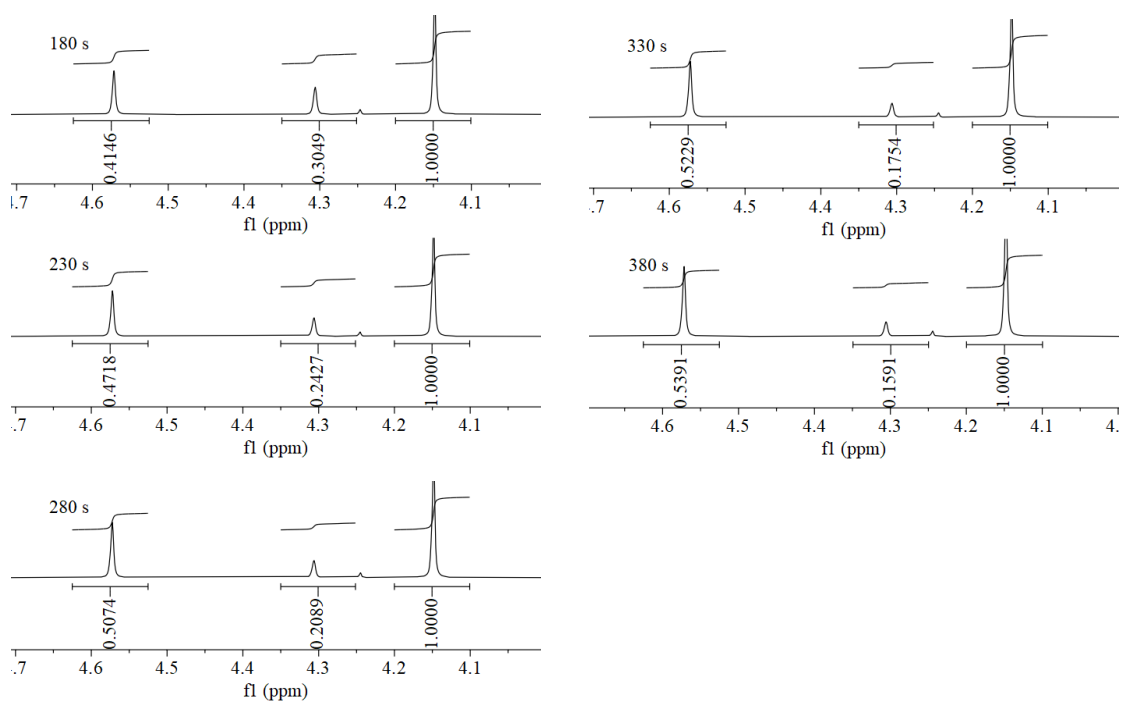

**Figure S67.**  $^1\text{H}$  NMR spectroscopic monitoring of the *Z-2b* to *E-2b* isomerization at 368.15 K in *p*-Xylene- $d_{10}$ .

**Table S8.** The table of the *Z-2b* to *E-2b* isomerization at 368.15 K in *p*-Xylene- $d_{10}$ .

| t (s) | integration<br>$\int_{E-2b}$ | integration<br>$\int_{Z-2b}$ | [ <i>E-2b</i> ]<br>(mol·L <sup>-1</sup> ) | [ <i>Z-2b</i> ]<br>(mol·L <sup>-1</sup> ) | ln[ <i>E-2b</i> ] | ln[ <i>Z-2b</i> ] |
|-------|------------------------------|------------------------------|-------------------------------------------|-------------------------------------------|-------------------|-------------------|
| 180   | 0.4146                       | 0.3049                       | 0.015970                                  | 0.011744                                  | -4.137041         | -4.444371         |
| 230   | 0.4718                       | 0.2427                       | 0.018173                                  | 0.009349                                  | -4.007800         | -4.672529         |
| 280   | 0.5074                       | 0.2089                       | 0.019545                                  | 0.008047                                  | -3.935055         | -4.822499         |
| 330   | 0.5229                       | 0.1754                       | 0.020142                                  | 0.006756                                  | -3.904965         | -4.997286         |
| 380   | 0.5391                       | 0.1591                       | 0.020766                                  | 0.006128                                  | -3.874454         | -5.094822         |

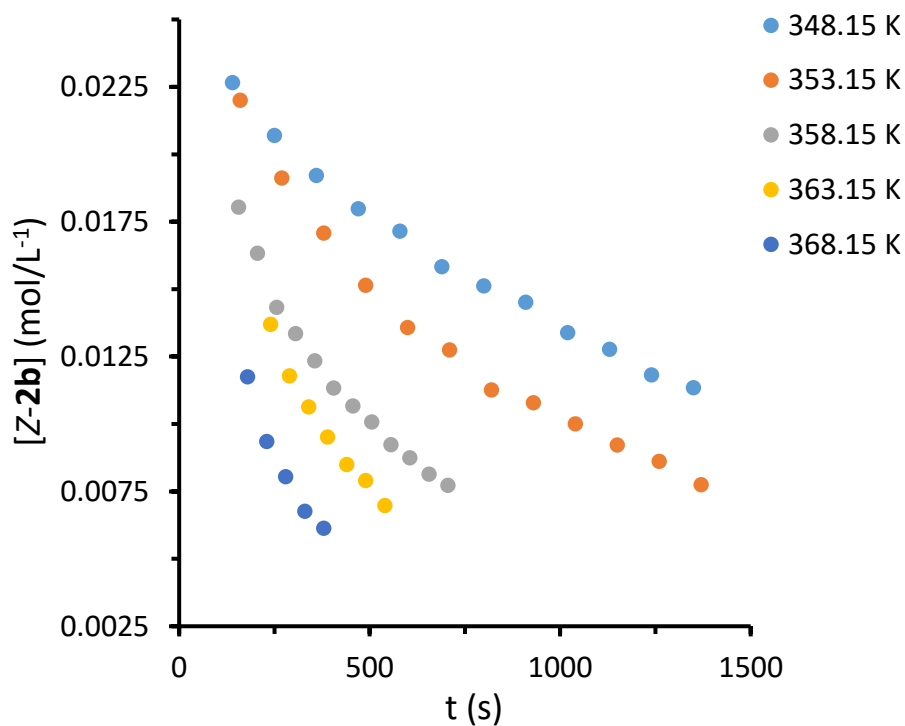

**Figure S68.** Plot of concentration of **Z-2b** against time at different temperatures.

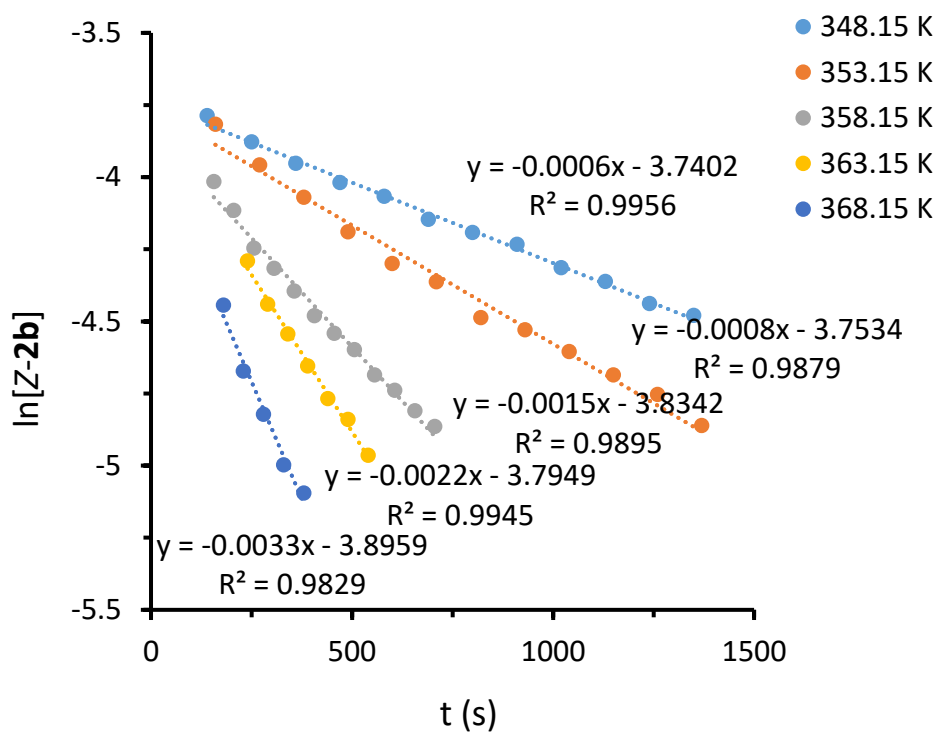

**Figure S69.** Plot of concentration of  $\text{Ln}[Z-2b]$  against time at different temperatures.

**Table S9.** The summary of Eyring plot of the **Z-2b** to **E-2b** isomerization.

| T<br>(K) | 1 / T<br>(K <sup>-1</sup> ) | k<br>(s <sup>-1</sup> ) | k / T<br>(K * s <sup>-1</sup> ) | ln (k / T)  | lnk       |
|----------|-----------------------------|-------------------------|---------------------------------|-------------|-----------|
| 348.15   | 0.002872325                 | 0.0005422               | 1.55737E-06                     | -13.3725090 | -7.519876 |
| 353.15   | 0.002831658                 | 0.0008228               | 2.32989E-06                     | -12.9696903 | -7.102797 |
| 358.15   | 0.002792126                 | 0.001485                | 4.14659E-06                     | -12.3932250 | -6.512273 |
| 363.15   | 0.002753683                 | 0.002200                | 6.0581E-06                      | -12.0141138 | -6.119298 |
| 368.15   | 0.002716284                 | 0.003300                | 8.96374E-06                     | -11.6223232 | -5.713833 |

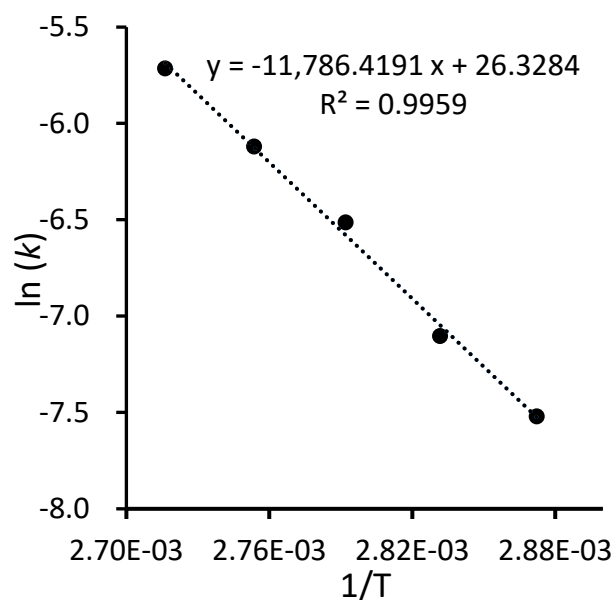

$$A = 2.72 \times 10^{11}$$

$$E_a = 23.4 \pm 0.9 \text{ kcal/mol}$$

$$k = (2.72 \times 10^{11}) \exp[(-2.34 \times 10^4)/RT]$$

**Figure S70.** Arrhenius equation of the **Z-2b** to **E-2b** isomerization

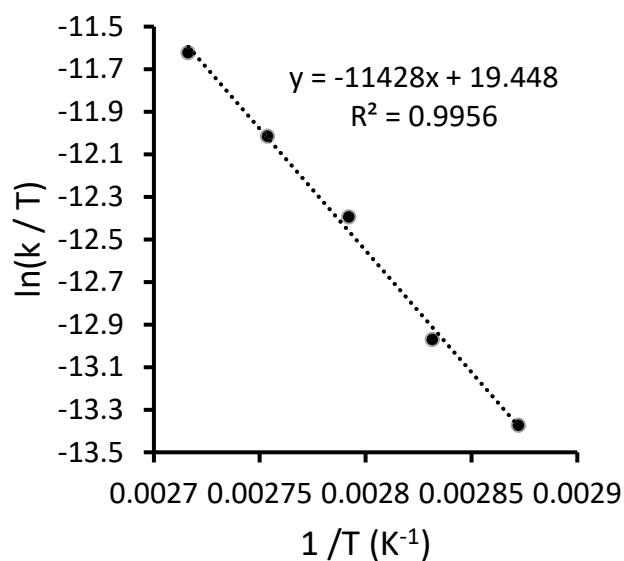

$$\Delta H^\ddagger = 22.7 \pm 0.9 \text{ kcal/mol}$$

$$\Delta S^\ddagger = -8.6 \pm 2.4 \text{ e.u.}$$

$$\Delta G^\ddagger (298) = 25.3 \pm 1.6 \text{ kcal/mol}$$

**Figure S71.** Eyring plot of the **Z-2b** to **E-2b** isomerization.

**Van't Hoff Analysis :** Compound **Z-2b** (0.020 g, 0.0297 mmol) and internal standard hexamethylenetetramine (2 mg) were dissolved in *p*-Xylene- $d_{10}$  (5 mL), the mixture was loaded into a dried J-Young NMR tube and sealed. The reaction was monitored by  $^1\text{H}$  NMR spectra over a range of temperature from 348.15 K to 368.15 K.

**Table S10.** The summary of Van't Hoff Analysis of the **Z-2b** to **E-2b** isomerization.

| T (K)  | 1/T (K <sup>-1</sup> ) | K <sub>eq</sub> | lnK <sub>eq</sub> |
|--------|------------------------|-----------------|-------------------|
| 348.15 | 0.002872325            | 4.168331        | 1.427515716       |
| 353.15 | 0.002831658            | 4.330515        | 1.465686473       |
| 358.15 | 0.002792126            | 4.497394        | 1.503498118       |
| 363.15 | 0.002753683            | 4.605240        | 1.527194786       |
| 368.15 | 0.002716284            | 4.745790        | 1.557257909       |

$\Delta H$  and  $\Delta S$  were determined by use of the Van't Hoff equation from the slope and the intercept of the plot of  $\ln(K_{eq})$  versus  $1/T$ .  $\Delta G$  was calculated according to Gibb's Free Energy equation.

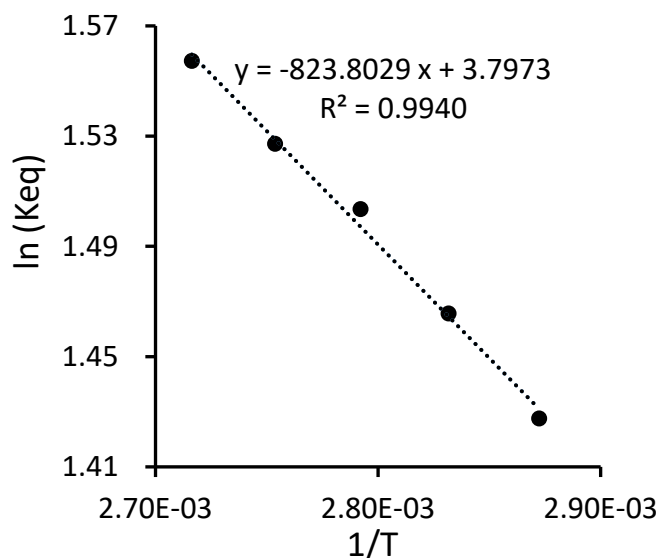

$$\Delta G = -0.61 \pm 0.13 \text{ kcal/mol}$$

$$\Delta H = 1.64 \pm 0.07 \text{ kcal/mol}$$

$$\Delta S = 7.55 \pm 0.20 \text{ e.u.}$$

**Figure S72.** Van't Hoff Analysis of the **Z-2b** to **E-2b** isomerization.

## S4. X-Ray diffraction studies

These data can be obtained free of charge via <http://www.ccdc.cam.ac.uk/cgi-bin/catreq.cgi>, or by emailing [data\\_request@ccdc.cam.ac.uk](mailto:data_request@ccdc.cam.ac.uk). The CCDC reference numbers are 2245822-2245824 and 2270969-2270971.

**Table S11.** The summary of crystal data and structure refinement

| Compounds         | <i>E-2a</i>                                                   | <i>E-2b</i>                                                 | <i>Z-2b</i>                                                 |
|-------------------|---------------------------------------------------------------|-------------------------------------------------------------|-------------------------------------------------------------|
| CCDC              | 2245822                                                       | 2245823                                                     | 2245824                                                     |
| Empirical formula | C <sub>12</sub> H <sub>17</sub> N <sub>8</sub> P <sub>4</sub> | C <sub>5</sub> H <sub>7</sub> N <sub>4</sub> P <sub>2</sub> | C <sub>5</sub> H <sub>7</sub> N <sub>4</sub> P <sub>2</sub> |
| Formula weight    | 1866.57                                                       | 869.16                                                      | 869.16                                                      |
| Temperature/K     | 150.00(10)                                                    | 149.99(10)                                                  | 151(1)                                                      |
| Crystal system    | triclinic                                                     | triclinic                                                   | monoclinic                                                  |

|                                             |                                                                                  |                                                                   |                                                                                 |
|---------------------------------------------|----------------------------------------------------------------------------------|-------------------------------------------------------------------|---------------------------------------------------------------------------------|
| Space group                                 | P-1                                                                              | P-1                                                               | P2 <sub>1</sub> /c                                                              |
| a/Å                                         | 10.8467(3)                                                                       | 10.9009(6)                                                        | 10.7687(5)                                                                      |
| b/Å                                         | 15.6202(4)                                                                       | 20.4655(12)                                                       | 13.0866(5)                                                                      |
| c/Å                                         | 18.4959(4)                                                                       | 26.2304(11)                                                       | 36.6199(17)                                                                     |
| α/°                                         | 65.623(2)                                                                        | 108.695(5)                                                        | 90                                                                              |
| β/°                                         | 86.626(2)                                                                        | 90.684(4)                                                         | 94.360(4)                                                                       |
| γ/°                                         | 86.202(2)                                                                        | 97.490(5)                                                         | 90                                                                              |
| Volume/Å <sup>3</sup>                       | 2846.36(13)                                                                      | 5486.8(5)                                                         | 5145.7(4)                                                                       |
| Z                                           | 1                                                                                | 4                                                                 | 4                                                                               |
| ρ <sub>calc</sub> /cm <sup>3</sup>          | 1.089                                                                            | 1.052                                                             | 1.122                                                                           |
| μ/mm <sup>-1</sup>                          | 0.116                                                                            | 0.116                                                             | 0.124                                                                           |
| F(000)                                      | 1018.0                                                                           | 1888.0                                                            | 1888.0                                                                          |
| Crystal size/mm <sup>3</sup>                | 0.15 × 0.15 × 0.05                                                               | 0.12 × 0.09 × 0.08                                                | 0.02 × 0.02 × 0.01                                                              |
| Radiation                                   | Mo Kα (λ = 0.71073)                                                              | Mo Kα (λ = 0.71073)                                               | Mo Kα (λ = 0.71073)                                                             |
| 2θ range for data collection/°              | 5.732 to 59.926                                                                  | 5.512 to 59.716                                                   | 5.096 to 59.854                                                                 |
| Index ranges                                | -15 ≤ h ≤ 15, -20 ≤ k ≤ 21,<br>-25 ≤ l ≤ 25                                      | -14 ≤ h ≤ 15, -28 ≤ k ≤ 28,<br>-35 ≤ l ≤ 36                       | -13 ≤ h ≤ 15, -18 ≤ k ≤ 18,<br>-50 ≤ l ≤ 48                                     |
| Reflections collected                       | 61291                                                                            | 124812                                                            | 65194                                                                           |
| Independent reflections                     | 14866 [R <sub>int</sub> = 0.0538,<br>R <sub>sigma</sub> = 0.0439]                | 28328 [R <sub>int</sub> = 0.1663,<br>R <sub>sigma</sub> = 0.1573] | 13404 [R <sub>int</sub> = 0.0691,<br>R <sub>sigma</sub> = 0.0585]               |
| Data/restraints/parameters                  | 14866/0/633                                                                      | 28328/0/1149                                                      | 13404/0/575                                                                     |
| Goodness-of-fit on F <sup>2</sup>           | 1.030                                                                            | 0.949                                                             | 1.014                                                                           |
| Final R indexes [I ≥ 2σ (I)]                | R <sub>1</sub> = 0.0488, wR <sub>2</sub> =<br>0.1201                             | R <sub>1</sub> = 0.0728, wR <sub>2</sub> = 0.1639                 | R <sub>1</sub> = 0.0519, wR <sub>2</sub> = 0.1109                               |
| Final R indexes [all data]                  | R <sub>1</sub> = 0.0702, wR <sub>2</sub> =<br>0.1307                             | R <sub>1</sub> = 0.1833, wR <sub>2</sub> = 0.2030                 | R <sub>1</sub> = 0.0792, wR <sub>2</sub> = 0.1186                               |
| Largest diff. peak/hole / e Å <sup>-3</sup> | 0.46/-0.28                                                                       | 1.14/-0.46                                                        | 0.34/-0.33                                                                      |
| <hr/>                                       |                                                                                  |                                                                   |                                                                                 |
| Compounds                                   | AuCl( <b>2b</b> )                                                                | <b>3</b>                                                          | <b>4</b>                                                                        |
| CCDC                                        | 2270969                                                                          | 2270970                                                           | 2270971                                                                         |
| Empirical formula                           | C <sub>68</sub> H <sub>87</sub> AuClF <sub>2</sub> N <sub>4</sub> P <sub>2</sub> | C <sub>62</sub> H <sub>88</sub> N <sub>4</sub> P <sub>2</sub>     | C <sub>129</sub> H <sub>197</sub> N <sub>8</sub> P <sub>4</sub> Si <sub>2</sub> |
| Formula weight                              | 1292.77                                                                          | 951.30                                                            | 2039.99                                                                         |
| Temperature/K                               | 149.99(10)                                                                       | 150.00(10)                                                        | 150.00                                                                          |
| Crystal system                              | monoclinic                                                                       | monoclinic                                                        | monoclinic                                                                      |
| Space group                                 | P2 <sub>1</sub> /c                                                               | P2 <sub>1</sub> /c                                                | P2 <sub>1</sub> /c                                                              |
| a/Å                                         | 13.8709(9)                                                                       | 12.9163(17)                                                       | 12.1506(7)                                                                      |
| b/Å                                         | 20.0194(14)                                                                      | 14.6645(10)                                                       | 26.0299(16)                                                                     |
| c/Å                                         | 23.2162(14)                                                                      | 31.890(3)                                                         | 21.3810(14)                                                                     |

|                                                |                                                                |                                                                |                                                                |
|------------------------------------------------|----------------------------------------------------------------|----------------------------------------------------------------|----------------------------------------------------------------|
| $\alpha/^\circ$                                | 90                                                             | 90                                                             | 90                                                             |
| $\beta/^\circ$                                 | 98.502(6)                                                      | 100.295(13)                                                    | 93.965(3)                                                      |
| $\gamma/^\circ$                                | 90                                                             | 90                                                             | 90                                                             |
| Volume/ $\text{\AA}^3$                         | 6376.0(7)                                                      | 5943.0(11)                                                     | 6746.2(7)                                                      |
| Z                                              | 4                                                              | 4                                                              | 2                                                              |
| $\rho_{\text{calc}}/\text{cm}^3$               | 1.347                                                          | 1.063                                                          | 1.004                                                          |
| $\mu/\text{mm}^{-1}$                           | 2.448                                                          | 0.112                                                          | 0.119                                                          |
| F(000)                                         | 2668.0                                                         | 2072.0                                                         | 2230.0                                                         |
| Crystal size/ $\text{mm}^3$                    | $0.12 \times 0.1 \times 0.05$                                  | $0.5 \times 0.5 \times 0.4$                                    | $0.12 \times 0.08 \times 0.05$                                 |
| Radiation                                      | Mo K $\alpha$ ( $\lambda = 0.71073$ )                          | Mo K $\alpha$ ( $\lambda = 0.71073$ )                          | MoK $\alpha$ ( $\lambda = 0.71073$ )                           |
| 2 $\theta$ range for data collection/ $^\circ$ | 5.354 to 59.636                                                | 4.784 to 59.724                                                | 2.468 to 54.33                                                 |
| Index ranges                                   | $-19 \leq h \leq 18, -27 \leq k \leq 27, -32 \leq l \leq 31$   | $-17 \leq h \leq 17, -20 \leq k \leq 20, -43 \leq l \leq 42$   | $-15 \leq h \leq 14, -33 \leq k \leq 33, -27 \leq l \leq 27$   |
| Reflections collected                          | 93106                                                          | 50772                                                          | 73462                                                          |
| Independent reflections                        | 16888 [ $R_{\text{int}} = 0.0908, R_{\text{sigma}} = 0.0698$ ] | 14724 [ $R_{\text{int}} = 0.0793, R_{\text{sigma}} = 0.0691$ ] | 14514 [ $R_{\text{int}} = 0.0746, R_{\text{sigma}} = 0.0588$ ] |
| Data/restraints/parameters                     | 16888/24/690                                                   | 14724/0/631                                                    | 14514/6/692                                                    |
| Goodness-of-fit on $F^2$                       | 1.007                                                          | 1.041                                                          | 1.059                                                          |
| Final R indexes [ $I \geq 2\sigma(I)$ ]        | $R_1 = 0.0447, wR_2 = 0.0984$                                  | $R_1 = 0.0550, wR_2 = 0.1400$                                  | $R_1 = 0.0985, wR_2 = 0.2662$                                  |
| Final R indexes [all data]                     | $R_1 = 0.0885, wR_2 = 0.1146$                                  | $R_1 = 0.0870, wR_2 = 0.1557$                                  | $R_1 = 0.1343, wR_2 = 0.2909$                                  |
| Largest diff. peak/hole / $e \text{\AA}^{-3}$  | 1.76/-0.64                                                     | 0.35/-0.26                                                     | 1.08/-0.48                                                     |

## S5: Theoretical details

Geometry optimizations were performed using the Gaussian09 optimizer.<sup>[2]</sup> All geometry optimizations were computed using the functional M06-2X or BP86 functional. The Def2-SVP basis set was used for all the atoms. Frequency calculations at the same level of theory were performed to identify the number of imaginary frequencies (zero for local minimum and one for transition states) and provide the thermal corrections of Gibbs free energy. Transition states were submitted to intrinsic reaction coordinate (IRC) calculations to determine two corresponding minima. The single-point energy calculations were performed at the M06-2X/Def2-TZVP level of



theory for solution-phase (toluene) for organic compounds, and at BP86/Def2-TZVP level of theory for solution-phase (THF) for metal complexes, respectively. The gas-phase geometry was used for all the solution phase calculations. The SMD method was used with the corresponding solvent, while the Bondi radii were chosen as the atomic radii to define the molecular cavity.<sup>[3]</sup> The Gibbs energy corrections from frequency calculations were added to the single-point energies to obtain the Gibbs free energies in solution, respectively. All the solution-phase free energies reported in the paper correspond to the reference state of 1 mol/L, 298K. TD-DFT calculations were performed at the PBE0/def2tzvp level of theory.

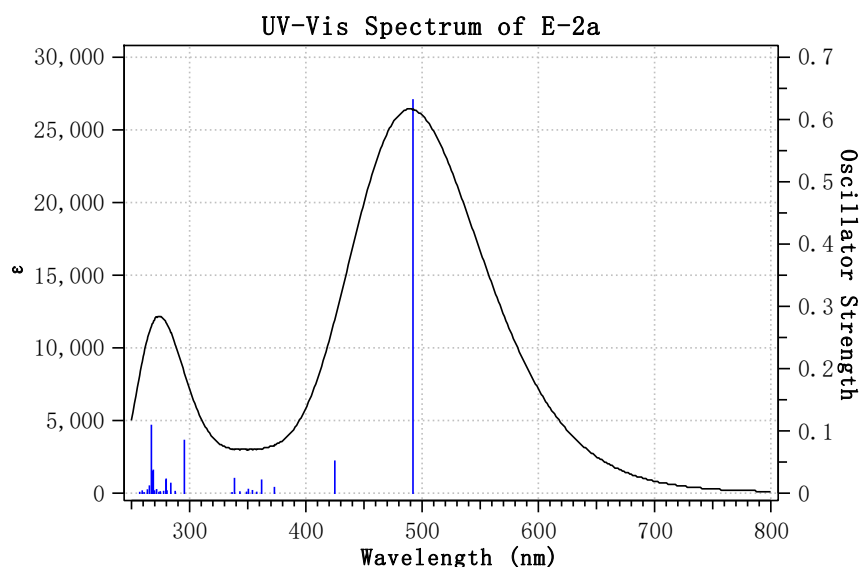

**Figure S73.** Electronic transitions of *E-2a* as modeled by TD-DFT.

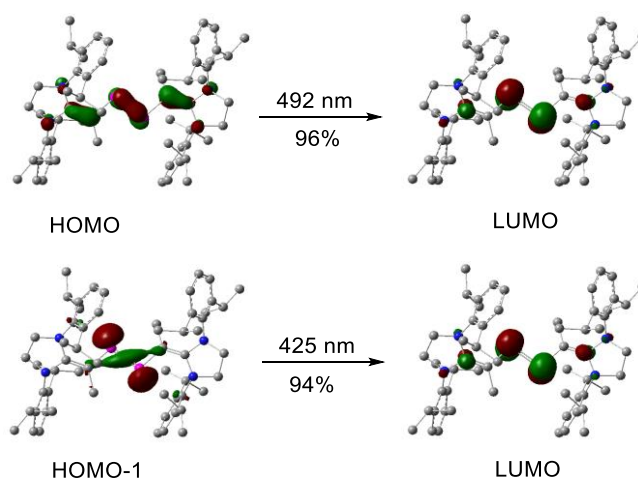

**Figure S74.** Major transition orbitals of *E-2a* for transitions at 492 and 425 nm from TD-DFT calculations.

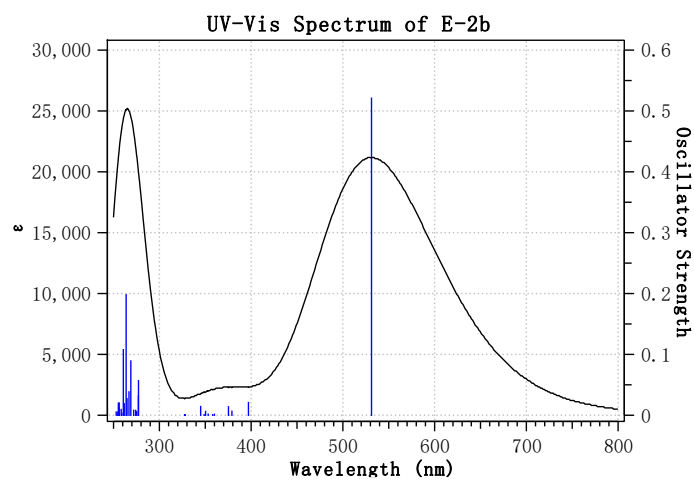

**Figure S75.** Electronic transitions of *E-2b* as modeled by TD-DFT.

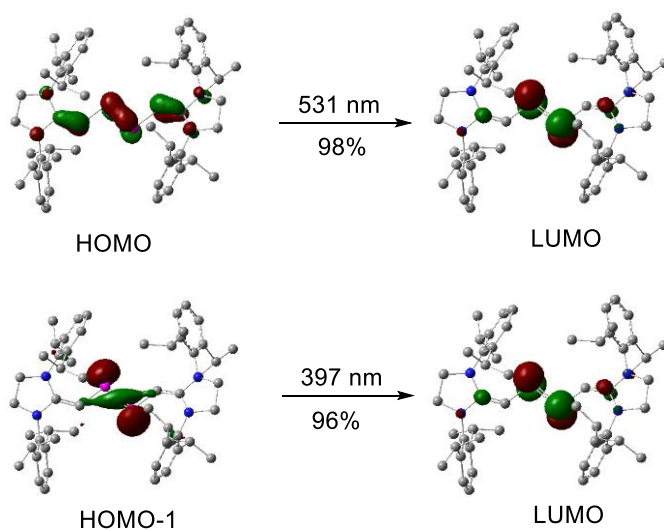

**Figure S76.** Major transition Orbitals of *E-2b* for transitions at 531 and 397 nm from TD-DFT calculations.

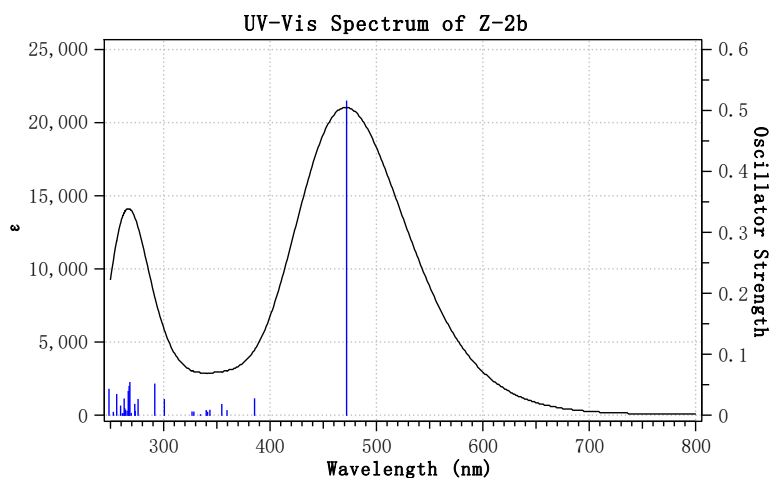

**Figure S77.** Electronic transitions of *Z-2b* as modeled by TD-DFT.

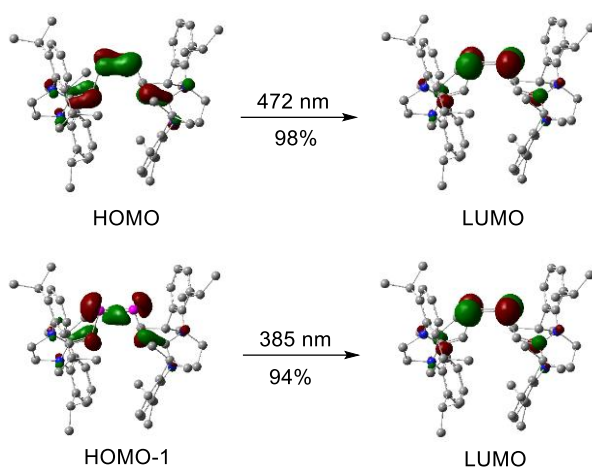

**Figure S78.** Major transition Orbitals of **Z-2b** for transitions at 472 and 385 nm from TD-DFT calculations.

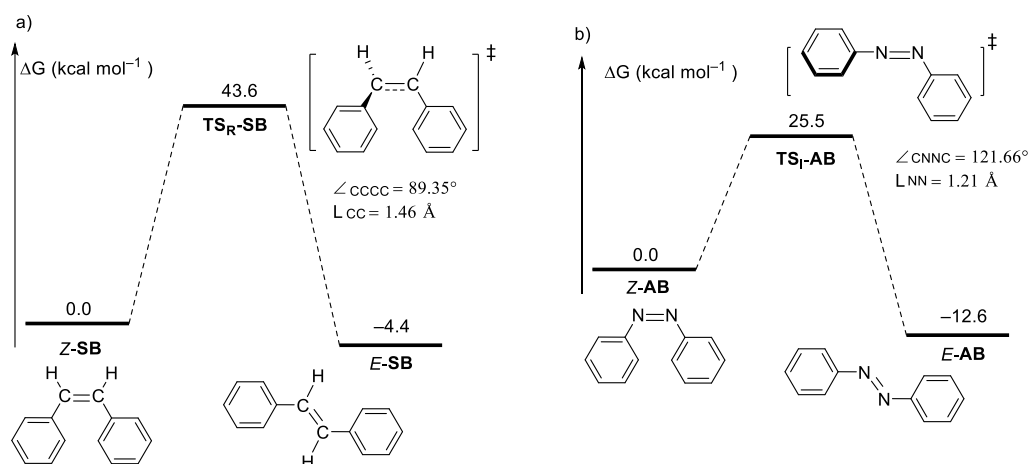

**Figure S79.** Calculated **Z**→**E** isomerization of a) stilbene (**SB**) and b) azobenzene (**AB**).

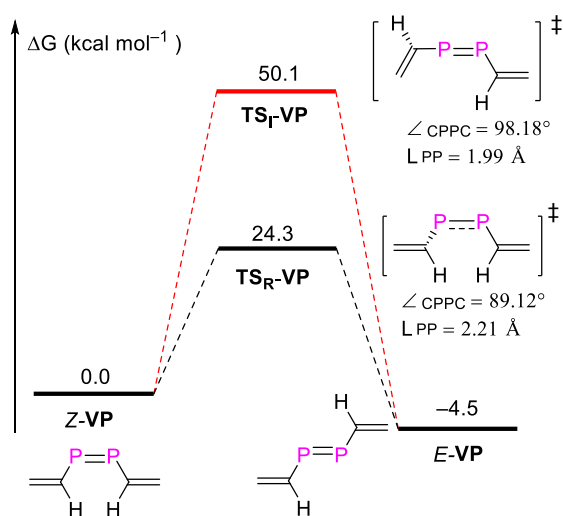

**Figure S80.** Calculated **Z**→**E** isomerization of 1,2-divinyldiphosphene (**VP**).

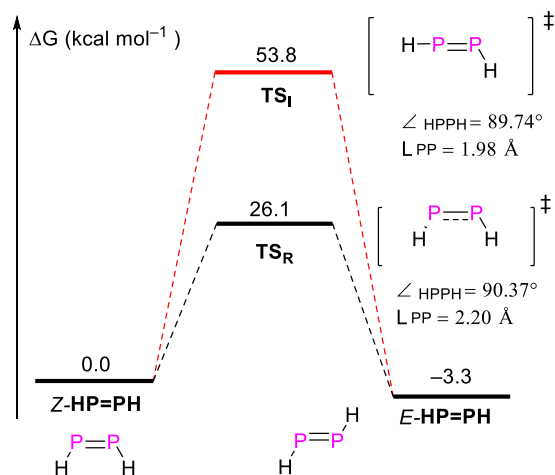

**Figure S81.** Calculated Z → E isomerization of HP=PH.

Cartesian Coordinates:

|             |             |             |             |            |             |             |             |
|-------------|-------------|-------------|-------------|------------|-------------|-------------|-------------|
| <b>E-2a</b> | H           | -8.28581200 | -1.79115300 | 1.79405100 |             |             |             |
| P           | -0.64198800 | 0.66707100  | -0.46446200 | H          | -7.61793800 | -1.34845500 | 3.38575700  |
| N           | -4.71396700 | 0.42756200  | -0.06343600 | H          | -7.17224100 | -2.89236300 | 2.64305000  |
| N           | -3.36504600 | 2.21026500  | -0.14475400 | C          | -4.22437800 | -0.34131700 | -2.88001100 |
| C           | -3.36687100 | 0.80941000  | -0.09252100 | H          | -3.98435500 | 0.61473500  | -2.39479300 |
| C           | -5.57671600 | 1.57370600  | -0.32976500 | C          | -2.90333600 | -0.95220100 | -3.35845900 |
| H           | -6.52072700 | 1.50396000  | 0.22902200  | H          | -2.21095400 | -1.11645500 | -2.52124300 |
| H           | -5.81774200 | 1.63461300  | -1.40780000 | H          | -2.41176800 | -0.27743400 | -4.07559400 |
| C           | -4.70269300 | 2.73091700  | 0.10877100  | H          | -3.07552400 | -1.91477500 | -3.86510000 |
| H           | -4.88750500 | 3.65420800  | -0.45801700 | C          | -5.14361600 | -0.02966000 | -4.06705000 |
| H           | -4.83595100 | 2.95407100  | 1.18429800  | H          | -5.38320200 | -0.94063400 | -4.63636800 |
| C           | -5.18709200 | -0.83048000 | -0.54555100 | H          | -4.65172500 | 0.67503100  | -4.75401000 |
| C           | -5.93590300 | -1.62794700 | 0.34521200  | H          | -6.09281800 | 0.41574400  | -3.73413500 |
| C           | -6.38093400 | -2.87301300 | -0.10142400 | C          | -2.27569900 | 3.01449000  | 0.31561600  |
| H           | -6.95664200 | -3.51610200 | 0.56446200  | C          | -1.68902600 | 3.91038300  | -0.60052600 |
| C           | -6.09180700 | -3.31256300 | -1.39301700 | C          | -0.56910100 | 4.63177700  | -0.18655300 |
| H           | -6.43413100 | -4.29503800 | -1.72172600 | H          | -0.07771500 | 5.31701300  | -0.87756300 |
| C           | -5.38530800 | -2.49566600 | -2.26630400 | C          | -0.05565300 | 4.47769200  | 1.10058400  |
| H           | -5.18420200 | -2.83944900 | -3.28344800 | H          | 0.83767900  | 5.02967700  | 1.39847600  |
| C           | -4.93504300 | -1.23030900 | -1.86968100 | C          | -0.69194200 | 3.64224700  | 2.01036900  |
| C           | -6.19419700 | -1.14660100 | 1.76757700  | H          | -0.30049100 | 3.55144100  | 3.02643300  |
| H           | -6.42188200 | -0.07095400 | 1.70719700  | C          | -1.82612100 | 2.90938800  | 1.64485200  |
| C           | -4.94522400 | -1.28976100 | 2.64791500  | C          | -2.24315000 | 4.04016000  | -2.01343600 |
| H           | -4.63912200 | -2.34556200 | 2.71344100  | H          | -3.33991600 | 3.97633600  | -1.93498800 |
| H           | -5.15657200 | -0.93102300 | 3.66700200  | C          | -1.79098200 | 2.88613500  | -2.91609900 |
| H           | -4.09931600 | -0.71351800 | 2.24917800  | H          | -0.69271300 | 2.85598800  | -2.98365300 |
| C           | -7.38791800 | -1.83491300 | 2.42724800  | H          | -2.20171900 | 3.01657700  | -3.92968100 |

|   |             |             |             |   |             |             |             |
|---|-------------|-------------|-------------|---|-------------|-------------|-------------|
| H | -2.12155600 | 1.91460500  | -2.52541300 | H | 7.90331200  | 0.70768500  | -3.46103000 |
| C | -1.90697200 | 5.38195000  | -2.66365400 | H | 7.21284000  | 2.32945000  | -3.29645300 |
| H | -2.16544800 | 6.22852200  | -2.01110200 | C | 3.75679800  | 1.16444200  | 2.39722400  |
| H | -2.46128900 | 5.49031800  | -3.60684300 | H | 3.66060400  | 0.08738400  | 2.20265500  |
| H | -0.83607100 | 5.45167800  | -2.90722200 | C | 2.34070200  | 1.72356700  | 2.56741500  |
| C | -2.51292600 | 2.03481200  | 2.68319200  | H | 1.71175700  | 1.52866300  | 1.68656700  |
| H | -3.34949600 | 1.51121200  | 2.20019300  | H | 1.85356600  | 1.25491900  | 3.43649900  |
| C | -1.57240900 | 0.96548800  | 3.24918000  | H | 2.36505000  | 2.81128100  | 2.74145900  |
| H | -1.11585400 | 0.36818500  | 2.44669500  | C | 4.56170500  | 1.32176500  | 3.69351100  |
| H | -2.12377600 | 0.29063600  | 3.92185900  | H | 4.64591800  | 2.38031600  | 3.98335800  |
| H | -0.76031800 | 1.42726100  | 3.83278800  | H | 4.06515300  | 0.78681800  | 4.51680600  |
| C | -3.09934400 | 2.89535600  | 3.80862100  | H | 5.58131800  | 0.92323300  | 3.58516100  |
| H | -2.30399700 | 3.42719500  | 4.35282900  | C | 2.50916300  | -3.17037700 | 0.26005600  |
| H | -3.63917300 | 2.26544700  | 4.53169500  | C | 1.89339900  | -3.76715300 | 1.37840000  |
| H | -3.79674700 | 3.65042200  | 3.41661800  | C | 0.89951500  | -4.71868100 | 1.14965500  |
| C | -2.27015100 | -0.02457800 | -0.05827100 | H | 0.39110600  | -5.18716600 | 1.99268000  |
| P | 0.60577200  | -0.88221800 | 0.02696200  | C | 0.53675900  | -5.07389300 | -0.14863300 |
| N | 4.67186900  | -0.32524200 | 0.00699100  | H | -0.25681700 | -5.80525000 | -0.30980900 |
| N | 3.47297700  | -2.14444600 | 0.50409900  | C | 1.19818700  | -4.51689100 | -1.23609300 |
| C | 3.36746800  | -0.83812500 | 0.01372700  | H | 0.92522800  | -4.82286300 | -2.24853900 |
| C | 5.58269200  | -1.23406800 | 0.69556800  | C | 2.20944000  | -3.56747300 | -1.05508700 |
| H | 6.58263500  | -1.22393100 | 0.23942400  | C | 2.27774100  | -3.33976500 | 2.78857000  |
| H | 5.68518000  | -0.94668400 | 1.75892000  | H | 3.36328000  | -3.15333800 | 2.78339800  |
| C | 4.86807400  | -2.56180200 | 0.54890200  | C | 1.59920000  | -2.02403600 | 3.18828500  |
| H | 5.05052400  | -3.25015800 | 1.38608000  | H | 0.50355000  | -2.13059600 | 3.16170700  |
| H | 5.15417400  | -3.07506800 | -0.38879900 | H | 1.89762000  | -1.73743700 | 4.20919800  |
| C | 4.96943000  | 1.06653900  | 0.13054300  | H | 1.86586600  | -1.20753600 | 2.50362600  |
| C | 5.76704000  | 1.65365600  | -0.87434300 | C | 2.00012800  | -4.41790400 | 3.83579800  |
| C | 6.03102400  | 3.02117900  | -0.78907400 | H | 2.42392700  | -5.38967600 | 3.54363900  |
| H | 6.63742900  | 3.50721700  | -1.55353500 | H | 2.43885300  | -4.12502000 | 4.80036600  |
| C | 5.52058500  | 3.78250800  | 0.26234700  | H | 0.91977500  | -4.55047400 | 3.99805300  |
| H | 5.72295700  | 4.85380900  | 0.30533600  | C | 2.92822200  | -3.00136500 | -2.27060700 |
| C | 4.77464600  | 3.17593500  | 1.26439800  | H | 3.65169400  | -2.24847600 | -1.92763800 |
| H | 4.40392300  | 3.77514800  | 2.09921500  | C | 1.96522800  | -2.29874500 | -3.23338100 |
| C | 4.50080400  | 1.80269200  | 1.23267400  | H | 1.38689400  | -1.51764100 | -2.72004000 |
| C | 6.27540500  | 0.81023400  | -2.03761200 | H | 2.52534400  | -1.83400900 | -4.05901800 |
| H | 6.58850500  | -0.15876700 | -1.61893800 | H | 1.25483900  | -3.01587700 | -3.67341300 |
| C | 5.16772500  | 0.51708100  | -3.05886800 | C | 3.71555500  | -4.10114200 | -2.99281400 |
| H | 4.77402400  | 1.45505800  | -3.48047700 | H | 3.03967600  | -4.87465600 | -3.38827900 |
| H | 5.56794200  | -0.08734700 | -3.88715700 | H | 4.27650700  | -3.67894400 | -3.84015300 |
| H | 4.33152200  | -0.03301400 | -2.60586000 | H | 4.42809500  | -4.59603500 | -2.31638600 |
| C | 7.48810200  | 1.42270000  | -2.73670900 | C | 2.22618300  | -0.17181900 | -0.38099000 |
| H | 8.28016400  | 1.68897400  | -2.02204800 | C | -2.36658900 | -1.49409600 | 0.28079600  |

H -1.91659300 -2.12134500 -0.50832700  
H -1.77741900 -1.70206100 1.19118500  
H -3.38178800 -1.85469000 0.46003200  
C 2.27584900 1.16686900 -1.08042000  
H 1.60887600 1.14077600 -1.95820000  
H 1.90003500 1.98753600 -0.44261800  
H 3.27008100 1.44765700 -1.43312300

**<sup>3</sup>T-2a**

P -0.79063200 -0.56630400 0.78169900  
N -4.51724900 0.74798700 -0.30575800  
N -3.93058900 -0.81019700 1.18823200  
C -3.42135800 0.03714900 0.20036300  
C -5.69987300 0.51072800 0.51626800  
H -6.61825000 0.51267500 -0.08713000  
H -5.79449600 1.29410700 1.29165300  
C -5.38652500 -0.83911700 1.13000200  
H -5.82209100 -0.97586300 2.12964500  
H -5.73506300 -1.66779000 0.48491600  
C -4.40553600 2.04722100 -0.88923100  
C -4.91965300 2.22610600 -2.19128000  
C -4.77191200 3.47831300 -2.78899600  
H -5.14869700 3.64734300 -3.79779500  
C -4.14278700 4.52369600 -2.11298100  
H -4.02219800 5.49174100 -2.60165100  
C -3.69381400 4.34177400 -0.81167500  
H -3.23325700 5.17609200 -0.27776200  
C -3.83439000 3.10763000 -0.16417200  
C -5.59477100 1.06777600 -2.91834500  
H -6.21395000 0.54281200 -2.17446600  
C -4.58588400 0.04430500 -3.45641100  
H -3.88805200 0.52197000 -4.16161400  
H -5.11440300 -0.75849200 -3.99259300  
H -4.00031800 -0.41444500 -2.64828300  
C -6.52237600 1.52923000 -4.04177900  
H -7.22947400 2.29787900 -3.69817800  
H -7.09964900 0.67563300 -4.42430500  
H -5.95259300 1.94183500 -4.88819100  
C -3.41332800 2.98012100 1.29354200  
H -3.62315400 1.95532200 1.63015100  
C -1.91524200 3.22520400 1.49570600  
H -1.31317300 2.47933600 0.95931100  
H -1.66006800 3.15284400 2.56375700

H -1.62615300 4.22933400 1.14815900  
C -4.24316100 3.92529000 2.17138400  
H -4.03553500 4.97851300 1.92839600  
H -3.99884200 3.77115300 3.23298000  
H -5.32173400 3.75740000 2.03484800  
C -3.28824700 -2.00812800 1.63295100  
C -2.95993500 -2.10319100 2.99976400  
C -2.27615400 -3.23964900 3.43189100  
H -1.99049100 -3.33637400 4.47958200  
C -1.94205700 -4.25480500 2.53729000  
H -1.38965100 -5.12797900 2.88824900  
C -2.33284800 -4.17010700 1.20658700  
H -2.09268800 -4.98493100 0.51995200  
C -3.03011000 -3.05529300 0.73039100  
C -3.30903400 -0.97123400 3.95677300  
H -4.29372800 -0.58383500 3.65029200  
C -2.31703200 0.19296300 3.85020400  
H -1.29590000 -0.14551400 4.08359000  
H -2.59305400 0.99180600 4.55677600  
H -2.29589100 0.61393300 2.83623900  
C -3.42834600 -1.43302700 5.40891100  
H -4.08790600 -2.30750500 5.50659900  
H -3.83609300 -0.62107100 6.02793000  
H -2.44533000 -1.69727300 5.82715200  
C -3.47690900 -3.01943300 -0.72350600  
H -3.96515400 -2.05300400 -0.91259900  
C -2.29972700 -3.13023100 -1.69721400  
H -1.56337500 -2.33223800 -1.53057100  
H -2.65824700 -3.06012800 -2.73556300  
H -1.78091700 -4.09515100 -1.58710700  
C -4.51171900 -4.11902500 -0.99188000  
H -4.06945900 -5.11717100 -0.85143100  
H -4.87988000 -4.05629700 -2.02700000  
H -5.37204500 -4.03790700 -0.31094100  
C -2.10391200 0.15207100 -0.21843700  
P 0.85821200 -0.97707100 -0.59967700  
N 4.46338700 0.87520700 0.12799000  
N 4.02144000 -1.05445200 -0.91091400  
C 3.41788700 0.05922500 -0.32235800  
C 5.73795900 0.17040800 0.02735800  
H 6.55903300 0.85929200 -0.21627100  
H 5.97968600 -0.32995100 0.98359900  
C 5.45372600 -0.83885500 -1.06794600

H 6.01261700 -1.77792400 -0.95066700  
H 5.68020800 -0.42570200 -2.06901900  
C 4.33299200 1.77937500 1.22659800  
C 4.64430500 3.13559600 0.99439300  
C 4.48047200 4.03673100 2.04693700  
H 4.70382000 5.09336800 1.89861700  
C 4.02772400 3.60352300 3.29329000  
H 3.89060900 4.32367300 4.10142000  
C 3.77355400 2.25625600 3.51384400  
H 3.44855100 1.92284500 4.50196900  
C 3.93973500 1.31192100 2.49262000  
C 5.11010500 3.58814700 -0.38465500  
H 5.80230900 2.81663300 -0.75663700  
C 3.95119800 3.66681300 -1.38762600  
H 3.19321800 4.38894200 -1.04608900  
H 4.32239000 4.00146100 -2.36838900  
H 3.46217400 2.69220900 -1.52206300  
C 5.87066200 4.91297500 -0.35416500  
H 6.67973700 4.90229000 0.39028800  
H 6.31214400 5.11392700 -1.34057000  
H 5.20098500 5.75442800 -0.12004000  
C 3.73906800 -0.16521400 2.80312200  
H 3.92185100 -0.74366600 1.88688600  
C 2.31261800 -0.48339200 3.26061800  
H 1.57401300 -0.24679200 2.48232200  
H 2.21837900 -1.55524000 3.49108500  
H 2.05220300 0.07980600 4.17058400  
C 4.76139300 -0.63090000 3.84767200  
H 4.59715100 -0.13005500 4.81397200  
H 4.67101600 -1.71507800 4.01143500  
H 5.79145900 -0.41183700 3.52936100  
C 3.38321300 -1.87367500 -1.89168100  
C 3.21524900 -3.24195800 -1.59673400  
C 2.53204500 -4.03081400 -2.52157000  
H 2.36821900 -5.08906500 -2.31713500  
C 2.04189800 -3.48127400 -3.70571200  
H 1.49207600 -4.10929900 -4.40856300  
C 2.27324400 -2.14481500 -4.00484800  
H 1.91188400 -1.73227500 -4.94954500  
C 2.96450000 -1.31725000 -3.11345500  
C 3.73375500 -3.81711700 -0.28539200  
H 4.69412200 -3.31926400 -0.07596400  
C 2.80102400 -3.50288000 0.89086200

H 1.79550300 -3.91433100 0.71315000  
H 3.20208100 -3.94334100 1.81754800  
H 2.68493500 -2.42079700 1.03664400  
C 4.00130800 -5.32020800 -0.36037000  
H 4.61996000 -5.58296300 -1.23079000  
H 4.52287500 -5.65329100 0.54827800  
H 3.06229800 -5.89075000 -0.42264600  
C 3.24221900 0.12911300 -3.49742300  
H 3.77280500 0.61440200 -2.66591900  
C 1.95609500 0.92573300 -3.73610500  
H 1.32157900 0.92392400 -2.83915000  
H 2.19676000 1.96897400 -3.99117200  
H 1.37539300 0.50143200 -4.56971400  
C 4.15818000 0.19078700 -4.72568800  
H 3.66487700 -0.24586600 -5.60741500  
H 4.41185300 1.23461100 -4.96427900  
H 5.09266100 -0.36496600 -4.55818300  
C 2.06098900 0.30559700 -0.19004200  
C -1.74472400 0.95586300 -1.45199900  
H -1.44300300 1.99083900 -1.21225700  
H -0.89298000 0.47670300 -1.95805400  
H -2.55982700 1.02565800 -2.17774700  
C 1.53685400 1.63261500 0.32636300  
H 0.63387900 1.90345800 -0.23914000  
H 1.24378800 1.58680300 1.38945300  
H 2.24740800 2.45683700 0.21845200

### Z-2a

P -0.98434200 -1.88432600 0.09203900  
P 1.06307800 -1.82880600 0.01930100  
N -3.65138500 -0.73692400 -1.30225500  
N 3.66592800 1.37400200 0.19013500  
N 3.80700900 -0.61877800 1.16107100  
N -3.68437000 1.23848200 -0.27391100  
C -2.94643300 0.04693500 -0.39020700  
C 4.15604100 -3.01413900 1.30636400  
C -3.66183400 2.06306100 0.88963800  
C -3.26689800 -1.98887200 -1.86655100  
C -1.75707000 -0.23541700 0.24323400  
C 2.98831000 0.15645700 0.34066800  
C -2.51690800 -2.03013000 -3.05389400  
C 3.50570100 -1.86247100 1.79529300  
C 1.75001600 -0.15466500 -0.19053900

|   |             |             |             |   |             |             |             |
|---|-------------|-------------|-------------|---|-------------|-------------|-------------|
| C | 3.44880100  | 2.30478700  | -0.86794900 | C | -4.37520300 | -3.07732300 | 0.13793800  |
| C | 5.01991200  | 1.28789200  | 0.71839000  | H | -3.86868100 | -2.26002200 | 0.67683600  |
| H | 5.34054100  | 2.24711100  | 1.14836700  | C | 2.70804400  | 4.48602700  | -1.55728100 |
| H | 5.73742900  | 1.00782400  | -0.07685600 | H | 2.32474200  | 5.48102400  | -1.33036200 |
| C | -3.25350500 | 3.40512900  | 0.73749800  | C | 3.45859000  | 2.88273100  | -3.19985700 |
| C | 2.65401200  | -1.91316300 | 2.91511500  | H | 3.65525500  | 2.62453000  | -4.24297300 |
| C | -4.06024700 | 1.54254300  | 2.13234400  | C | 2.93114500  | 4.12927700  | -2.88793200 |
| C | 5.09992100  | -2.91856400 | 0.11712000  | H | 2.70836400  | 4.84113600  | -3.68432200 |
| H | 5.63156700  | -1.95701100 | 0.20298300  | C | -2.72557700 | -4.44628700 | -3.03510900 |
| C | -3.69930000 | -3.16675100 | -1.22117400 | H | -2.51784300 | -5.41273000 | -3.49718800 |
| C | 3.74071200  | 1.94918300  | -2.19477600 | C | 2.76073200  | 3.95395600  | 0.94207800  |
| C | 2.97326600  | 3.58742800  | -0.52301400 | H | 3.63265500  | 3.56081200  | 1.48934000  |
| C | -4.95741600 | 1.12708600  | -0.97486600 | C | -3.15660500 | 4.19318000  | 1.88501300  |
| H | -5.25586000 | 2.08664200  | -1.41983200 | H | -2.83023300 | 5.23043200  | 1.80788100  |
| H | -5.75996800 | 0.80099800  | -0.28525800 | C | -2.57288500 | -0.44060900 | -5.01529100 |
| C | 3.88023500  | -4.23735000 | 1.91793100  | H | -2.15699200 | 0.49076900  | -5.42780300 |
| H | 4.35590000  | -5.14738600 | 1.55153900  | H | -3.66224900 | -0.32388700 | -4.92165700 |
| C | 2.40604000  | -3.16128500 | 3.49453600  | H | -2.38862500 | -1.24448400 | -5.74469800 |
| H | 1.73155700  | -3.23103900 | 4.34959900  | C | -3.47393000 | 3.67112200  | 3.13988100  |
| C | -1.91582000 | -0.77887200 | -3.67267300 | H | -3.37757900 | 4.29772300  | 4.02794800  |
| H | -2.08709200 | 0.05520400  | -2.97384800 | C | -0.39809600 | -0.92327900 | -3.83675000 |
| C | 4.87051000  | 0.18521400  | 1.74556400  | H | -0.15073500 | -1.66127200 | -4.61533700 |
| H | 5.78140700  | -0.41397200 | 1.88411300  | H | 0.06903400  | -1.25022900 | -2.89618500 |
| H | 4.56596800  | 0.59322100  | 2.72666600  | H | 0.04793800  | 0.03846900  | -4.13303400 |
| C | 2.99980800  | -4.31343200 | 2.99456900  | C | -4.19533800 | -4.34012300 | 0.97728400  |
| H | 2.78634800  | -5.27953200 | 3.45464200  | H | -4.75601800 | -5.19142500 | 0.56135300  |
| C | -2.92689400 | 3.95332400  | -0.64814400 | H | -4.57252800 | -4.16850700 | 1.99610700  |
| H | -3.70959700 | 3.57447600  | -1.32447200 | H | -3.13353800 | -4.61724800 | 1.04458500  |
| C | -4.64522200 | 0.05960000  | -2.00529100 | C | 5.73280500  | 0.80811000  | -3.20368400 |
| H | -5.51406700 | -0.55412500 | -2.27972600 | H | 5.64825600  | 1.33136000  | -4.16847400 |
| H | -4.23028100 | 0.50985600  | -2.92586700 | H | 6.21531200  | -0.16307700 | -3.38942400 |
| C | 4.35403900  | 0.60501000  | -2.56380000 | H | 6.39144100  | 1.40577200  | -2.55643000 |
| H | 4.49913400  | 0.02460000  | -1.64111900 | C | -5.85758300 | -2.71025300 | 0.01753800  |
| C | -3.93847700 | 2.36761700  | 3.25771100  | H | -5.99422800 | -1.75669200 | -0.51159000 |
| H | -4.21600200 | 1.97943400  | 4.24045900  | H | -6.31219300 | -2.61206400 | 1.01562100  |
| C | -4.63588100 | 0.14063300  | 2.28526500  | H | -6.40711800 | -3.48924100 | -0.53327800 |
| H | -4.69499100 | -0.32093600 | 1.28926700  | C | 2.74446600  | -0.23812100 | 4.78357200  |
| C | -2.26633200 | -3.27987000 | -3.63211800 | H | 2.31417200  | 0.69352800  | 5.18094300  |
| H | -1.68491900 | -3.33788400 | -4.55468500 | H | 3.81877000  | -0.08069500 | 4.61360100  |
| C | -3.42178100 | -4.38996800 | -1.82807800 | H | 2.64460600  | -1.01586000 | 5.55647000  |
| H | -3.73096900 | -5.31765000 | -1.34636700 | C | 6.15190700  | -4.02684400 | 0.09144500  |
| C | 2.01152500  | -0.66836600 | 3.50531600  | H | 6.67930400  | -4.11140800 | 1.05270500  |
| H | 2.09854800  | 0.14059200  | 2.76273300  | H | 6.89390100  | -3.82003700 | -0.69311200 |



H 5.70123600 -5.00389200 -0.13896500  
C -1.58776700 3.44258200 -1.19431600  
H -1.41692300 3.83669500 -2.20759400  
H -1.55616100 2.34620300 -1.24348100  
H -0.75338100 3.78364700 -0.56215900  
C 0.52161600 -0.86722200 3.80482400  
H 0.37661300 -1.53982600 4.66410600  
H -0.00543200 -1.29366200 2.93985400  
H 0.05394000 0.09605100 4.05782600  
C 3.44862600 -0.22840900 -3.47718100  
H 2.52307100 -0.52383600 -2.96336500  
H 3.96731700 -1.14820500 -3.78496300  
H 3.18045000 0.32791600 -4.38902300  
C 1.52127200 3.28683100 1.55161800  
H 0.60317200 3.64701800 1.06271500  
H 1.44644300 3.53457300 2.62140100  
H 1.55256100 2.19356900 1.45411900  
C -3.76152900 -0.77259500 3.15081800  
H -3.62221000 -0.35228000 4.15929400  
H -2.77344500 -0.93037400 2.69621900  
H -4.24138700 -1.75730600 3.26103600  
C 2.71136300 5.46235100 1.17921600  
H 3.57634800 5.97633900 0.73593000  
H 2.70185300 5.67093600 2.25834400  
H 1.79608500 5.90298600 0.75472500  
C -2.96760700 5.47938500 -0.71026800  
H -2.13175200 5.92380000 -0.14817700  
H -3.90621800 5.88221700 -0.30332200  
H -2.87210700 5.81368200 -1.75299200  
C -6.06449400 0.21237500 2.83824500  
H -6.51204100 -0.79187200 2.87610000  
H -6.70321800 0.85372900 2.21310000  
H -6.07607200 0.62213000 3.85967500  
C 4.32128200 -2.88909800 -1.20283000  
H 3.73655200 -3.81357300 -1.32450400  
H 5.01556900 -2.79929900 -2.05353000  
H 3.61595100 -2.04748400 -1.23730200  
C -1.09644100 0.75933600 1.18305900  
H -1.10197000 1.78465400 0.79348600  
H -1.57303100 0.78977600 2.17534600  
H -0.04813300 0.47890400 1.33821400  
C 0.97777200 0.83701300 -1.04724300  
H -0.04186000 0.46968600 -1.20537500

H 0.89367700 1.83128000 -0.58923800  
H 1.42096300 0.98206900 -2.04234300

### TSR-2a

P -0.76248400 1.33576400 -1.11766200  
P 0.87303100 -0.09263100 -1.52228800  
N -3.65235500 2.00105000 -0.11345200  
N 4.47434700 -0.39175700 0.20716200  
N 3.07977800 -1.99392300 -0.53601600  
N -4.24288700 -0.09090300 0.43928700  
C -3.16082600 0.71128600 0.06392000  
C 1.28512100 -3.43952700 -1.37081100  
C -4.26810400 -1.50648900 0.23535200  
C -2.86431800 3.17395400 0.11540900  
C -1.85350800 0.29786000 -0.13629900  
C 3.15786700 -0.64490200 -0.18681200  
C -2.28646400 3.39849700 1.38116500  
C 1.91010800 -2.78987300 -0.28633300  
C 2.11683000 0.26379700 -0.28127000  
C 5.06262600 0.91176700 0.15308700  
C 5.33313700 -1.49940600 -0.20765600  
H 6.14262500 -1.67566200 0.51508600  
H 5.79305300 -1.27571600 -1.18719000  
C -4.51474900 -2.31936000 1.36202100  
C 1.45225800 -2.96735700 1.03505000  
C -4.07073400 -2.05492000 -1.04471000  
C 1.83178500 -3.32234700 -2.78280800  
H 2.51626700 -2.46143300 -2.78892100  
C -2.71280800 4.09712200 -0.93659700  
C 5.08835900 1.64522700 -1.04788000  
C 5.65701400 1.40395100 1.33452400  
C -5.49350500 0.62384100 0.19590400  
H -6.25864100 0.36156200 0.94025300  
H -5.88875300 0.37327300 -0.80586800  
C 0.16478400 -4.23381300 -1.11414000  
H -0.33999300 -4.73273800 -1.94366300  
C 0.32151200 -3.76658800 1.24128500  
H -0.06297700 -3.89731400 2.25557600  
C -2.47948500 2.45431100 2.55915200  
H -3.18142500 1.66290500 2.26080400  
C 4.35685500 -2.66180800 -0.30470100  
H 4.60383500 -3.35505500 -1.12102500  
H 4.31812100 -3.24052400 0.63612000

C -0.32356900 -4.39015900 0.18048200  
H -1.21356200 -4.99494400 0.36138000  
C -4.75197800 -1.68789400 2.72825500  
H -5.34881800 -0.77758500 2.56350300  
C -5.05593500 2.07726500 0.27234500  
H -5.62232300 2.73280100 -0.40435700  
H -5.15000000 2.47687700 1.29958500  
C 4.60368100 1.09011700 -2.38065100  
H 4.13288500 0.11183700 -2.21211300  
C -4.04182100 -3.45075300 -1.16009100  
H -3.87142100 -3.90072200 -2.14067200  
C -3.93011100 -1.20944800 -2.30310300  
H -3.92401600 -0.14792600 -2.02049200  
C -1.50299400 4.54363300 1.55202000  
H -1.02531500 4.72533600 2.51741900  
C -1.94640600 5.24193900 -0.70961700  
H -1.81197600 5.96570800 -1.51588800  
C 2.13870200 -2.34615700 2.24549900  
H 3.05776400 -1.84447800 1.91092000  
C -3.34921100 3.86336600 -2.29512400  
H -3.71603200 2.82624100 -2.30184500  
C 6.21196400 2.68436600 1.31304400  
H 6.67075300 3.09278900 2.21370700  
C 5.64445700 2.93054700 -1.01592400  
H 5.66154100 3.52618200 -1.93105800  
C 6.18818900 3.45227300 0.15035700  
H 6.61515900 4.45633200 0.15204700  
C -1.33107700 5.45873600 0.51901100  
H -0.71757000 6.34762700 0.67406900  
C 5.66194300 0.56020900 2.60284900  
H 5.81982000 -0.48485400 2.29441800  
C -4.49277700 -3.70466800 1.19503900  
H -4.67352100 -4.35806200 2.04891600  
C -3.10446500 3.18040500 3.75556200  
H -3.31305300 2.46707200 4.56711000  
H -4.04705700 3.67418000 3.47670100  
H -2.42814400 3.95121900 4.15463100  
C -4.24013500 -4.26831100 -0.05521100  
H -4.21602500 -5.35367800 -0.16794900  
C -1.16453400 1.77447900 2.95543900  
H -0.41026700 2.52034600 3.25168300  
H -0.76136100 1.19161100 2.11529600  
H -1.32053500 1.09503100 3.80762000

C -2.33966600 4.00320300 -3.43716200  
H -1.97642400 5.03826400 -3.52939900  
H -2.81145800 3.73319800 -4.39381600  
H -1.47782000 3.34196900 -3.27256400  
C 5.79362300 0.87883000 -3.32651700  
H 6.28010600 1.83686900 -3.56544700  
H 5.45616500 0.42632400 -4.27066800  
H 6.55562500 0.22292500 -2.87997200  
C -4.54180800 4.80463600 -2.50252200  
H -5.28653800 4.70165200 -1.69954200  
H -5.03760900 4.59989400 -3.46328400  
H -4.20860600 5.85427000 -2.51055900  
C 2.55564400 -3.42406000 3.25301500  
H 3.14300100 -2.97541100 4.06821500  
H 3.16454400 -4.20603300 2.77562500  
H 1.67872700 -3.91217100 3.70405000  
C 2.62549300 -4.58392300 -3.14774700  
H 3.42312700 -4.79047200 -2.41947100  
H 3.08321900 -4.48181800 -4.14316000  
H 1.96214400 -5.46282700 -3.16680600  
C -3.43666300 -1.24646400 3.38253800  
H -3.63132500 -0.80802000 4.37354700  
H -2.91475000 -0.49634400 2.77367300  
H -2.76413800 -2.10895300 3.51533400  
C 1.26402500 -1.28210100 2.91906800  
H 0.26963100 -1.68485200 3.16870900  
H 1.12471900 -0.41256300 2.26048400  
H 1.73404100 -0.93316900 3.85069200  
C 3.55040100 1.98783400 -3.03642200  
H 2.69090100 2.14882900 -2.37213400  
H 3.17330100 1.51661600 -3.95587100  
H 3.97497600 2.96687100 -3.30774300  
C 4.30665900 0.61513000 3.31533600  
H 4.06434100 1.64941300 3.60582900  
H 4.32614200 -0.00222700 4.22703300  
H 3.50187900 0.24275500 2.66877500  
C -2.61596700 -1.48463600 -3.03978100  
H -2.57276300 -2.52291700 -3.40510200  
H -1.74753600 -1.31004600 -2.38973300  
H -2.52045200 -0.81776700 -3.90977200  
C 6.78657100 0.93127700 3.56846700  
H 7.76365500 0.95928300 3.06505100  
H 6.83858200 0.19464900 4.38282100

H 6.61169700 1.91427300 4.03125000  
C -5.53838300 -2.59082000 3.67770200  
H -4.93701900 -3.45332100 4.00271900  
H -6.45761200 -2.97183600 3.21000200  
H -5.81710100 -2.03117800 4.58185400  
C -5.13108200 -1.43678200 -3.23016300  
H -5.05950800 -0.78699200 -4.11483800  
H -6.08188700 -1.22430200 -2.71904700  
H -5.16728200 -2.47984400 -3.57984700  
C 0.74329100 -3.05557300 -3.82295100  
H 0.05374900 -3.90867700 -3.91859500  
H 1.19971700 -2.89139000 -4.81033900  
H 0.16467700 -2.16089600 -3.55689300  
C -1.37229900 -1.03513900 0.39061600  
H -2.01625700 -1.45677000 1.16887800  
H -1.26864600 -1.80125400 -0.39629600  
H -0.37232800 -0.91218200 0.82548200  
C 2.13812100 1.58558100 0.45634600  
H 1.16164200 1.75805600 0.93497700  
H 2.90613700 1.62606000 1.23664900  
H 2.30738000 2.44263200 -0.21732600

**E-2b**

P -0.56707400 0.79468900 -0.38537800  
N -4.62854600 0.06942500 -0.08247100  
N -3.63792400 2.06235600 0.07189100  
C -3.39307600 0.70895200 -0.11304500  
C -5.70861400 1.04412700 -0.13359800  
H -6.57385400 0.71205200 0.45771600  
H -6.04435600 1.21398400 -1.17440900  
C -5.03036900 2.28226700 0.44271900  
H -5.41157800 3.22139400 0.01721800  
H -5.14406500 2.32795900 1.54197600  
C -4.81951600 -1.23136400 -0.63409600  
C -5.16470900 -2.27781400 0.24505100  
C -5.36723400 -3.55187700 -0.28978200  
H -5.63880500 -4.37936300 0.36614800  
C -5.22174100 -3.78184500 -1.65633200  
H -5.37781900 -4.78433600 -2.05804600  
C -4.87956600 -2.73874900 -2.50841100  
H -4.76849800 -2.92950100 -3.57815000  
C -4.67821700 -1.44337700 -2.01838000  
C -5.25408300 -2.01344600 1.73973400

H -5.68816100 -1.00904600 1.86478900  
C -3.85017900 -1.98241100 2.35859600  
H -3.36248900 -2.96326700 2.24530800  
H -3.90832900 -1.74944200 3.43328000  
H -3.21061100 -1.23081800 1.87398200  
C -6.14673000 -3.00670700 2.48115800  
H -7.13917900 -3.09050400 2.01496500  
H -6.28142100 -2.68365800 3.52331000  
H -5.69559900 -4.01017900 2.50893100  
C -4.31980300 -0.32526100 -2.98537100  
H -4.21194800 0.60746400 -2.41368200  
C -2.97669400 -0.58925700 -3.67435700  
H -2.16743300 -0.69618600 -2.93814400  
H -2.72233300 0.24649700 -4.34337300  
H -3.01908700 -1.50644300 -4.28218100  
C -5.43441100 -0.10986800 -4.01507900  
H -5.56139400 -0.99660600 -4.65463200  
H -5.19249900 0.74201500 -4.66790700  
H -6.39962800 0.09052500 -3.52682900  
C -2.62973600 2.95213800 0.55190300  
C -2.17828700 3.96614700 -0.31448700  
C -1.13715000 4.78753900 0.12021300  
H -0.75539100 5.57285700 -0.53252900  
C -0.56729600 4.60814100 1.37890800  
H 0.25806400 5.24781900 1.69664900  
C -1.05197800 3.62596700 2.23464100  
H -0.60553600 3.50404400 3.22420500  
C -2.09756200 2.78327500 1.84369600  
C -2.78355800 4.10570700 -1.70319400  
H -3.85924100 3.88858200 -1.60699100  
C -2.19506000 3.06763700 -2.66693300  
H -1.10851900 3.21158300 -2.76871800  
H -2.65518600 3.16676000 -3.66276600  
H -2.36038100 2.04220300 -2.30766300  
C -2.64171400 5.51243100 -2.28237000  
H -3.00045300 6.28041600 -1.58176300  
H -3.22193100 5.59518300 -3.21250300  
H -1.59430100 5.73917800 -2.53247700  
C -2.61728900 1.73359000 2.81535000  
H -3.35169500 1.10478200 2.29096600  
C -1.50488100 0.80527900 3.31307800  
H -0.98307900 0.32078700 2.47480800  
H -1.92651900 0.02150000 3.96024100

H -0.76094300 1.36051500 3.90557900  
C -3.33353200 2.40457700 3.99387100  
H -2.63262200 3.02315700 4.57526300  
H -3.75659500 1.64646000 4.67003700  
H -4.14864000 3.05941500 3.65183600  
C -2.20182300 0.06239300 -0.28226300  
P 0.56140800 -0.90018400 -0.18979200  
N 4.60535200 -0.03140000 -0.02477300  
N 3.66097800 -1.96899900 0.54137100  
C 3.38899600 -0.70590000 0.03801100  
C 5.63836800 -0.77662200 0.68019900  
H 6.61764800 -0.65692500 0.19514700  
H 5.72747400 -0.44010200 1.73076900  
C 5.09830200 -2.20000800 0.59643900  
H 5.36723400 -2.81712100 1.46539600  
H 5.45384600 -2.71295800 -0.31709200  
C 4.67894000 1.39079700 -0.09534700  
C 5.22838200 1.96569200 -1.25920300  
C 5.31126600 3.35761100 -1.33439600  
H 5.73532800 3.82959200 -2.22104800  
C 4.85236800 4.15536600 -0.28794300  
H 4.91722500 5.24192700 -0.36480200  
C 4.31554300 3.57163100 0.85321300  
H 3.96168900 4.20583500 1.66915800  
C 4.22514400 2.18055900 0.97777400  
C 5.66440600 1.07200100 -2.40956600  
H 6.11870000 0.17286400 -1.96452300  
C 4.44421300 0.61196900 -3.21799800  
H 3.95007100 1.47814000 -3.68485400  
H 4.75046400 -0.08027200 -4.01772600  
H 3.70565700 0.10417900 -2.58115200  
C 6.70278700 1.71912600 -3.32370700  
H 7.56018100 2.10894800 -2.75603700  
H 7.07573800 0.98120100 -4.04823200  
H 6.26848000 2.54920200 -3.90126300  
C 3.65553700 1.57868400 2.25333100  
H 3.66382000 0.48381700 2.15476400  
C 2.19945700 2.00127200 2.47576700  
H 1.55674000 1.70877300 1.63175800  
H 1.80262600 1.52653700 3.38640400  
H 2.12085900 3.09270000 2.60256200  
C 4.52336500 1.94095800 3.46382300  
H 4.51877500 3.02687100 3.64394500

H 4.13964500 1.44901300 4.37008700  
H 5.56880500 1.63153200 3.31726100  
C 2.77072600 -3.06893700 0.36412600  
C 2.14749400 -3.60510900 1.50803500  
C 1.22720100 -4.63916400 1.33074200  
H 0.71881800 -5.06847900 2.19449700  
C 0.94067400 -5.12712500 0.05741900  
H 0.20822400 -5.92659800 -0.06501900  
C 1.59028800 -4.60670700 -1.05519300  
H 1.36658900 -5.00630600 -2.04674000  
C 2.52318300 -3.57297100 -0.92515800  
C 2.44101200 -3.02325800 2.88279600  
H 3.50650200 -2.74382800 2.89265300  
C 1.63301500 -1.74121200 3.12182100  
H 0.55346100 -1.95332600 3.07139500  
H 1.85939900 -1.32498600 4.11638900  
H 1.85554000 -0.97480100 2.36580400  
C 2.20854900 -4.01883900 4.01849100  
H 2.72437700 -4.97292700 3.83702000  
H 2.57849500 -3.60036000 4.96542900  
H 1.13690600 -4.22914400 4.15422900  
C 3.22683600 -3.03651700 -2.16304700  
H 3.86197300 -2.18952000 -1.86466000  
C 2.23458500 -2.50829700 -3.20340200  
H 1.59735800 -1.71984000 -2.77872000  
H 2.77575100 -2.08971400 -4.06513100  
H 1.58273300 -3.31353800 -3.57573400  
C 4.13784900 -4.10927000 -2.77161700  
H 3.54921100 -4.97109700 -3.12170400  
H 4.68783400 -3.70370000 -3.63406600  
H 4.86778300 -4.48133100 -2.03746900  
C 2.19114500 -0.15878000 -0.32666000  
H -2.28791300 -1.02421500 -0.37580500  
H 2.25502500 0.88406200 -0.65170900

### Z-2b

P -0.81311900 -2.07938600 0.32137500  
P 1.22571900 -1.96674500 0.19565000  
N -3.78784300 -1.09123600 -0.39494700  
N 3.22988700 1.56011600 -0.54557100  
N 4.06474100 -0.22533200 0.49566000  
N -3.56106800 0.92622800 0.52946900  
C -2.86717300 -0.22352800 0.17196000

C 4.66929500 -2.48840500 1.14460600  
C -3.05278900 1.86705400 1.47209100  
C -3.44987900 -2.08765400 -1.36424900  
C -1.52461000 -0.43502100 0.35621000  
H -0.94764500 0.41311500 0.74049100  
C 2.91268100 0.29024400 -0.07744900  
C -2.90433900 -1.70289200 -2.60558600  
C 4.04334300 -1.26958500 1.46943600  
C 1.66538300 -0.27047200 -0.17856700  
H 0.90986600 0.38157900 -0.62858400  
C 2.48679300 2.18405900 -1.59085000  
C 4.66568100 1.79609600 -0.47187500  
H 4.88621200 2.84067200 -0.20973300  
H 5.15224000 1.57256800 -1.43964700  
C -2.86184000 3.19308100 1.03301700  
C 3.42532700 -1.05435100 2.71400600  
C -2.81006800 1.48328000 2.80375300  
C 5.35391600 -2.65866400 -0.20382700  
H 5.85532700 -1.70379900 -0.43006400  
C -3.72290900 -3.43542300 -1.06448900  
C 2.50487600 1.63654300 -2.88774600  
C 1.79617100 3.37562300 -1.29181700  
C -4.99828400 0.69327400 0.47014000  
H -5.53893500 1.59553900 0.15045300  
H -5.38770900 0.39180600 1.46048100  
C 4.61000300 -3.52399700 2.07766700  
H 5.07464100 -4.48453000 1.85430500  
C 3.37993100 -2.12503500 3.61316500  
H 2.88638900 -1.99407700 4.57870000  
C -2.60851700 -0.25443500 -2.96344800  
H -2.94292400 0.38704800 -2.13634200  
C 5.08833400 0.80754100 0.60794000  
H 6.09223100 0.39126700 0.44346000  
H 5.06730000 1.26985900 1.61233200  
C 3.95447600 -3.34945500 3.29528700  
H 3.90358900 -4.17511800 4.00680900  
C -3.15411200 3.54732400 -0.41640100  
H -4.06717100 3.00322300 -0.70318500  
C -5.08737900 -0.44472200 -0.53727100  
H -5.90600100 -1.14627500 -0.32357200  
H -5.21555000 -0.06561100 -1.56857800  
C 3.28634800 0.37817800 -3.23632400  
H 3.79310100 0.01846900 -2.32972600

C -2.28524400 2.44602300 3.67500900  
H -2.07179500 2.17046600 4.71034400  
C -3.18026800 0.10672700 3.33709700  
H -3.55515000 -0.50100600 2.50150500  
C -2.60460300 -2.70768200 -3.53005800  
H -2.16035600 -2.43467900 -4.48980400  
C -3.42847700 -4.40161500 -2.02864800  
H -3.62783000 -5.45321800 -1.81259300  
C 2.81816700 0.28422100 3.10851600  
H 2.94234300 0.98546600 2.27080800  
C -4.30723300 -3.84935500 0.27431100  
H -4.29447700 -2.95827200 0.91929100  
C 1.13281400 4.02617200 -2.33554900  
H 0.60751100 4.96233300 -2.14699400  
C 1.79474700 2.30457900 -3.89161400  
H 1.78333800 1.89423900 -4.90396300  
C 1.12128900 3.48979500 -3.62176100  
H 0.58600800 4.00687600 -4.41997500  
C -2.86543600 -4.04462500 -3.24966800  
H -2.62616800 -4.81307600 -3.98640400  
C 1.78338000 3.90666600 0.13639200  
H 2.82406100 3.86468100 0.49903500  
C -2.37276300 4.12925600 1.94586500  
H -2.21810000 5.16342900 1.63622500  
C -3.37682500 0.18365500 -4.21467600  
H -3.18826400 1.24763100 -4.42336500  
H -4.46093200 0.04074100 -4.09319600  
H -3.06084900 -0.39066400 -5.09864600  
C -2.06533700 3.75211500 3.25237700  
H -1.66633600 4.48982100 3.95064100  
C -1.10233500 -0.03249000 -3.13729200  
H -0.72514900 -0.59190100 -4.00788600  
H -0.55293400 -0.37500400 -2.24786600  
H -0.87556100 1.03382800 -3.29603200  
C -3.45984700 -4.92684500 0.95622100  
H -3.48023200 -5.87059800 0.38990800  
H -3.85131600 -5.13684500 1.96290000  
H -2.41553500 -4.59753200 1.04643300  
C 4.36839400 0.67784300 -4.28014300  
H 3.92204600 0.98718600 -5.23746000  
H 4.97565500 -0.21999800 -4.46837900  
H 5.03711200 1.48575700 -3.94774600  
C -5.76015600 -4.31191100 0.11611400

H -6.38461900 -3.53750100 -0.35337900  
H -6.19747800 -4.56350200 1.09396000  
H -5.81398500 -5.20981300 -0.51912000  
C 3.54855700 0.87803700 4.31827700  
H 3.14185800 1.87119300 4.56107600  
H 4.62721200 0.98074300 4.12767100  
H 3.42641700 0.23847700 5.20564700  
C 6.42052800 -3.75265300 -0.20181100  
H 7.13309000 -3.62713500 0.62632000  
H 6.98166900 -3.73033600 -1.14691000  
H 5.96835200 -4.75228100 -0.11648300  
C -2.02208900 3.05239400 -1.32245200  
H -2.29135300 3.15748600 -2.38569500  
H -1.77205100 1.99849300 -1.12927500  
H -1.11405500 3.64509700 -1.14777800  
C 1.31618100 0.16662200 3.37577000  
H 1.11622500 -0.50421500 4.22600500  
H 0.79582300 -0.23593300 2.49520400  
H 0.88239600 1.15116100 3.61201800  
C 2.36450100 -0.74894300 -3.70953300  
H 1.63871500 -1.01825600 -2.92935500  
H 2.95417000 -1.64517400 -3.95341800  
H 1.81022500 -0.45236200 -4.61395300  
C 0.94502200 3.01747800 1.06678700  
H -0.10928800 3.00416500 0.75293900  
H 0.97627700 3.40962500 2.09559000  
H 1.30429000 1.98127600 1.08193200  
C -1.98332100 -0.64044600 3.92571500  
H -1.52744200 -0.07806600 4.75569700  
H -1.21721000 -0.81562600 3.15973600  
H -2.30278800 -1.61798600 4.31629300  
C 1.30893200 5.35468200 0.23711600  
H 1.87377300 6.02436400 -0.42735700  
H 1.42483200 5.71447900 1.26920300  
H 0.24008900 5.43837700 -0.01773300  
C -3.40822500 5.03561900 -0.64278500  
H -2.49344400 5.62727100 -0.48334700  
H -4.18779300 5.42503300 0.02790300  
H -3.72812500 5.20749600 -1.68040100  
C -4.31070600 0.23191600 4.36676300  
H -4.63857200 -0.76423000 4.69873200  
H -5.17933400 0.76337500 3.95032300  
H -3.97424100 0.78901900 5.25445200

C 4.33365900 -2.90962700 -1.32037300  
H 3.76730100 -3.83258300 -1.12474500  
H 4.84745200 -3.01216000 -2.28933800  
H 3.60678500 -2.08942200 -1.39655700

### **<sup>3</sup>T-2b**

P 0.81721100 1.22040400 -1.09966600  
N 3.91842700 -0.69265000 0.87024300  
N 4.09479400 1.23873400 -0.23240400  
C 3.20501500 0.24309300 0.12863800  
C 5.24536900 -0.18455000 1.19190900  
H 5.99279300 -0.99065000 1.18416800  
H 5.25678000 0.28799300 2.19231900  
C 5.46141400 0.84255600 0.08580800  
H 6.05972300 1.70666400 0.40762700  
H 5.95317200 0.38947800 -0.79473600  
C 3.29247400 -1.59820500 1.77807900  
C 3.35381500 -2.97713200 1.48950700  
C 2.80962300 -3.87077300 2.41611700  
H 2.85024500 -4.94329800 2.22421600  
C 2.22284500 -3.40909700 3.59299100  
H 1.80531900 -4.12066700 4.30741400  
C 2.16207700 -2.04585400 3.85504200  
H 1.69047200 -1.69339600 4.77534300  
C 2.69269700 -1.11372100 2.95615300  
C 3.96981800 -3.45427200 0.18342200  
H 4.84305900 -2.81187100 -0.01243000  
C 2.98835700 -3.25566100 -0.97967500  
H 2.06490100 -3.83070600 -0.80712000  
H 3.43636400 -3.60282900 -1.92350000  
H 2.70422200 -2.20104100 -1.10044700  
C 4.45195200 -4.90273500 0.23421500  
H 5.10819300 -5.08650600 1.09729900  
H 5.01110000 -5.14278700 -0.68118200  
H 3.60645900 -5.60529900 0.29057800  
C 2.60518900 0.37082900 3.27793100  
H 3.12027900 0.93156200 2.48487300  
C 1.14945300 0.84800000 3.28908400  
H 0.67424300 0.69265500 2.30918500  
H 1.10125300 1.92208800 3.52466600  
H 0.56243300 0.30808100 4.04930300  
C 3.30274400 0.69698200 4.60266200  
H 2.79232900 0.21694900 5.45136400

|   |             |             |             |   |             |             |             |
|---|-------------|-------------|-------------|---|-------------|-------------|-------------|
| H | 3.29496800  | 1.78265000  | 4.77990200  | C | -4.10079500 | 2.20428600  | 2.26951000  |
| H | 4.34769300  | 0.35300500  | 4.60323900  | C | -4.14507800 | 3.57656600  | 2.52379700  |
| C | 3.86615500  | 2.11405500  | -1.33776800 | H | -4.02194400 | 3.94451000  | 3.54268700  |
| C | 3.67530800  | 3.48194100  | -1.06486700 | C | -4.34127200 | 4.48650100  | 1.48688600  |
| C | 3.41649500  | 4.33554800  | -2.13842600 | H | -4.36646500 | 5.55625700  | 1.70048400  |
| H | 3.25459400  | 5.39896300  | -1.96103400 | C | -4.50886400 | 4.03562800  | 0.18315200  |
| C | 3.35827100  | 3.84347100  | -3.44070800 | H | -4.66708000 | 4.75697200  | -0.62157300 |
| H | 3.14528500  | 4.52254400  | -4.26786700 | C | -4.48433500 | 2.66882200  | -0.11689100 |
| C | 3.57910500  | 2.49480500  | -3.69166800 | C | -3.82797800 | 1.19365000  | 3.37210300  |
| H | 3.54076000  | 2.12362500  | -4.71804500 | H | -4.43221800 | 0.30029700  | 3.14950800  |
| C | 3.84290100  | 1.60258800  | -2.64766200 | C | -2.35511600 | 0.76692600  | 3.34365800  |
| C | 3.71211000  | 3.98484800  | 0.37048500  | H | -1.70513500 | 1.63231500  | 3.54684900  |
| H | 4.50463300  | 3.41986000  | 0.88732500  | H | -2.15784400 | 0.00132900  | 4.11087000  |
| C | 2.39393200  | 3.68280600  | 1.09401400  | H | -2.07187400 | 0.35469200  | 2.36441100  |
| H | 1.55500800  | 4.18733800  | 0.59077500  | C | -4.21747500 | 1.68937900  | 4.76323700  |
| H | 2.43995500  | 4.03721000  | 2.13603800  | H | -5.25193000 | 2.06148700  | 4.78947100  |
| H | 2.17208800  | 2.60656500  | 1.10081900  | H | -4.12682500 | 0.87076000  | 5.49139500  |
| C | 4.05241500  | 5.47027700  | 0.47958000  | H | -3.55344500 | 2.49902800  | 5.10190700  |
| H | 4.96275800  | 5.72326000  | -0.08307300 | C | -4.70257100 | 2.21451200  | -1.55217900 |
| H | 4.21058000  | 5.74213600  | 1.53303400  | H | -4.65425700 | 1.11671000  | -1.58095600 |
| H | 3.23092900  | 6.09800900  | 0.10251900  | C | -3.60480600 | 2.73855400  | -2.48370100 |
| C | 4.09960800  | 0.13550400  | -2.96089400 | H | -2.61191900 | 2.39848300  | -2.15744100 |
| H | 4.19569300  | -0.41332000 | -2.01227900 | H | -3.77052800 | 2.37263900  | -3.50807400 |
| C | 2.94067100  | -0.50365000 | -3.73228000 | H | -3.60530600 | 3.83917600  | -2.51450100 |
| H | 1.99471300  | -0.40861400 | -3.18116600 | C | -6.09166400 | 2.62784900  | -2.05152900 |
| H | 3.14007700  | -1.57312500 | -3.89641800 | H | -6.18881400 | 3.72342000  | -2.09269300 |
| H | 2.81227200  | -0.03247700 | -4.71884100 | H | -6.26468600 | 2.23773600  | -3.06553500 |
| C | 5.41676300  | -0.02503300 | -3.73030200 | H | -6.88624300 | 2.24693500  | -1.39286900 |
| H | 5.36000800  | 0.47588300  | -4.70885900 | C | -2.88572000 | -2.51323100 | -0.93078200 |
| H | 5.63266300  | -1.08923500 | -3.90803400 | C | -2.97293000 | -2.95133100 | -2.26644500 |
| H | 6.26294900  | 0.41499000  | -3.18192200 | C | -2.07711800 | -3.93199500 | -2.69412000 |
| C | 1.86932000  | 0.11570600  | -0.17594700 | H | -2.10852700 | -4.28412500 | -3.72538100 |
| P | -0.79056600 | -0.24150600 | -1.51144100 | C | -1.13055100 | -4.46322300 | -1.81944300 |
| N | -4.23239500 | 0.36106600  | 0.69203700  | H | -0.42522800 | -5.21619200 | -2.17547800 |
| N | -3.74708000 | -1.45170400 | -0.51594800 | C | -1.09141200 | -4.04957200 | -0.49355700 |
| C | -3.25318300 | -0.22626100 | -0.09974700 | H | -0.35814600 | -4.48532500 | 0.18978000  |
| C | -5.48173100 | -0.38100900 | 0.58854300  | C | -1.97625800 | -3.07593100 | -0.01811600 |
| H | -6.02739900 | -0.37955000 | 1.54288100  | C | -3.99467800 | -2.33054100 | -3.20815600 |
| H | -6.13833700 | 0.05732100  | -0.18667600 | H | -4.90691500 | -2.15316200 | -2.61626600 |
| C | -4.98735900 | -1.76573000 | 0.18322300  | C | -3.52200900 | -0.96836300 | -3.73047600 |
| H | -5.68981500 | -2.30040400 | -0.47152800 | H | -2.58250400 | -1.07686500 | -4.29324900 |
| H | -4.78865400 | -2.39967800 | 1.06763400  | H | -4.28213500 | -0.53268000 | -4.39808100 |
| C | -4.26686800 | 1.76548800  | 0.94044400  | H | -3.32998500 | -0.26309200 | -2.91031200 |

C -4.36913500 -3.24614800 -4.37289200  
H -4.65590600 -4.25010500 -4.02768500  
H -5.21449500 -2.81734600 -4.92976400  
H -3.53458900 -3.35306900 -5.08221200  
C -1.92268700 -2.67136300 1.44743700  
H -2.69106000 -1.90495400 1.62902800  
C -0.57568500 -2.05050700 1.82327500  
H -0.40667500 -1.12346100 1.25953600  
H -0.55261900 -1.80851700 2.89669300  
H 0.26156300 -2.73827300 1.61997600  
C -2.24207300 -3.86934400 2.34939400  
H -1.46777200 -4.64660800 2.25945200  
H -2.27929900 -3.55515800 3.40325900  
H -3.20805800 -4.32610800 2.08730500  
C -2.03440200 0.35090800 -0.38208600  
H 1.43610600 -0.81620000 0.19704900  
H -1.87276100 1.31244700 0.11428900

**TS<sub>R</sub>-2b**

P -0.89558000 -1.45843000 0.64490000  
P 0.89557500 -1.45842000 -0.64491800  
N -4.18400700 -0.68291400 0.52304600  
N 3.80415000 1.11560400 0.74654900  
N 4.18400500 -0.68294800 -0.52302400  
N -3.80414200 1.11564300 -0.74651500  
C -3.20102200 0.00848900 -0.15990800  
C 4.06540100 -2.37210400 -2.26447500  
C -3.07077800 2.30105000 -1.06153700  
C -4.04921100 -2.05657000 0.89180400  
C -1.86455200 -0.28860700 -0.28776900  
H -1.33632500 0.39051300 -0.96248500  
C 3.20102500 0.00845700 0.15993300  
C -3.91671400 -3.04501600 -0.09978300  
C 4.04919500 -2.05659900 -0.89179900  
C 1.86455000 -0.28862500 0.28778200  
H 1.33632500 0.39049100 0.96250200  
C 3.07079800 2.30102700 1.06154100  
C 5.17417300 1.25656000 0.26724800  
H 5.83938800 1.62995000 1.05880200  
H 5.21986900 1.96025600 -0.58519400  
C -3.01662000 2.70549700 -2.41108600  
C 3.91671100 -3.04505800 0.09977600  
C -2.47754200 3.06299900 -0.03589300

C 4.21833300 -1.26825400 -3.30045200  
H 4.92339200 -0.53127200 -2.88388000  
C -4.06543500 -2.37209500 2.26447400  
C 2.47757500 3.06296000 0.03587700  
C 3.01664700 2.70551100 2.41107900  
C -5.17416000 1.25661200 -0.26720600  
H -5.83937400 1.63001400 -1.05875500  
H -5.21984600 1.96030200 0.58524100  
C 3.89744700 -3.70737500 -2.63363200  
H 3.89679900 -3.98369700 -3.68827100  
C 3.74149600 -4.36846600 -0.31794500  
H 3.61868200 -5.15444400 0.43037700  
C -3.97239200 -2.73190800 -1.58776700  
H -4.05378700 -1.64261700 -1.71393800  
C 5.50111200 -0.16715200 -0.16794900  
H 6.19050600 -0.21174400 -1.02271800  
H 5.93854900 -0.75379300 0.66143300  
C 3.72239500 -4.69647900 -1.66786400  
H 3.57913300 -5.73407200 -1.97364300  
C -3.62310200 1.82253500 -3.49077300  
H -4.56452800 1.41877600 -3.08596600  
C -5.50111000 -0.16710100 0.16798000  
H -6.19050100 -0.21169500 1.02275200  
H -5.93855600 -0.75373100 -0.66140600  
C 2.52296100 2.65316900 -1.42809700  
H 3.11302500 1.73021400 -1.51536100  
C -1.82479300 4.24903800 -0.39192700  
H -1.35071200 4.85032200 0.38748900  
C -2.52293400 2.65324700 1.42809200  
H -3.11304000 1.73032100 1.51538400  
C -3.74150300 -4.36842900 0.31792200  
H -3.61868300 -5.15439800 -0.43040800  
C -3.89747300 -3.70736900 2.63361700  
H -3.89682700 -3.98370100 3.68825300  
C 3.97240200 -2.73197300 1.58776400  
H 4.05388200 -1.64269000 1.71394900  
C -4.21837200 -1.26826800 3.30047200  
H -4.92338300 -0.53124500 2.88389400  
C 2.36722100 3.90391100 2.71757900  
H 2.31893700 4.24642000 3.75134800  
C 1.82485000 4.24902200 0.39187900  
H 1.35078400 4.85029500 -0.38755500  
C 1.77883300 4.67240300 1.71485300



H 1.27503600 5.60634200 1.97182600  
C -3.72240900 -4.69646000 1.66783800  
H -3.57914300 -5.73405600 1.97360400  
C 3.62309900 1.82255700 3.49078900  
H 4.56450700 1.41875100 3.08599400  
C -2.36716500 3.90387300 -2.71761800  
H -2.31887400 4.24635200 -3.75139700  
C -5.21611700 -3.36639700 -2.22232500  
H -5.28591600 -3.09558600 -3.28649800  
H -6.13779800 -3.03855600 -1.71889500  
H -5.17375900 -4.46429900 -2.15584200  
C -1.77876300 4.67238000 -1.71491200  
H -1.27494400 5.60630000 -1.97191100  
C -2.70106000 -3.17562400 -2.31801800  
H -2.58137000 -4.26919200 -2.27686800  
H -1.80715700 -2.71499600 -1.87515700  
H -2.75216300 -2.88468800 -3.37802000  
C -2.88770500 -0.54236400 3.52959500  
H -2.13085200 -1.23941700 3.92055600  
H -3.01749000 0.27723500 4.25432900  
H -2.49003900 -0.12384900 2.59511200  
C 3.21346100 3.71914500 -2.28566400  
H 2.63866700 4.65767800 -2.29434700  
H 3.29919600 3.37132000 -3.32590100  
H 4.22279300 3.94756500 -1.91209600  
C -4.79391700 -1.76170400 4.62703400  
H -5.71830400 -2.33936000 4.48162500  
H -5.02007900 -0.90568100 5.27881600  
H -4.07400200 -2.39691400 5.16475800  
C 5.21607000 -3.36656300 2.22233100  
H 5.28588200 -3.09575900 3.28650400  
H 6.13778200 -3.03879500 1.71890800  
H 5.17362600 -4.46446200 2.15584800  
C 4.79380400 -1.76167300 -4.62705100  
H 5.71818200 -2.33935900 -4.48170200  
H 5.01995900 -0.90564000 -5.27882300  
H 4.07384300 -2.39684900 -5.16475400  
C -2.70394400 0.62863700 -3.78267200  
H -3.14563300 -0.01703600 -4.55715700  
H -2.53041200 0.01988600 -2.88438500  
H -1.72588300 0.98092900 -4.14623300  
C 2.70102500 -3.17559800 2.31799300  
H 2.58124500 -4.26915600 2.27681300

H 1.80716500 -2.71488400 1.87513400  
H 2.75214200 -2.88469100 3.37800300  
C 1.11672600 2.35063200 -1.95707100  
H 0.63668500 1.56104500 -1.36105900  
H 1.16527400 2.00870800 -3.00213400  
H 0.47842800 3.24585300 -1.92031200  
C 2.70389300 0.62870300 3.78272100  
H 1.72586300 0.98104400 4.14631800  
H 3.14557900 -0.01699500 4.55718700  
H 2.53029600 0.01996400 2.88443800  
C -1.11670700 2.35066100 1.95706000  
H -0.47837300 3.24585500 1.92028000  
H -0.63670300 1.56104500 1.36105900  
H -1.16526200 2.00875800 3.00213000  
C 3.94930500 2.57494900 4.77918000  
H 4.55930100 3.46961300 4.58734800  
H 4.50521000 1.91960000 5.46456300  
H 3.03379600 2.88991200 5.30267100  
C -3.94927800 2.57490600 -4.77918400  
H -3.03375600 2.88982400 -5.30267800  
H -4.55924200 3.46959600 -4.58737600  
H -4.50520400 1.91956000 -5.46455200  
C -3.21337800 3.71927600 2.28563700  
H -3.29911500 3.37148300 3.32588500  
H -4.22270600 3.94772700 1.91207600  
H -2.63854500 4.65778400 2.29428800  
C 2.88768800 -0.54228800 -3.52951200  
H 2.13078800 -1.23930100 -3.92045200  
H 3.01748500 0.27731100 -4.25424400  
H 2.49007700 -0.12375600 -2.59501400

### Z-SB

C -3.70033200 -0.26373200 0.53767800  
C -2.80449800 0.80161800 0.60445400  
C -1.59008900 0.76603500 -0.09500100  
C -1.31157800 -0.35206000 -0.89677500  
C -2.20913500 -1.41289700 -0.96918800  
C -3.40346600 -1.37659100 -0.24721100  
H -4.63637900 -0.22158600 1.09678800  
H -3.04248900 1.67609900 1.21416500  
H -0.38368700 -0.38015000 -1.47038600  
H -1.97847100 -2.27288000 -1.59993700  
H -4.10527000 -2.20984800 -0.30589300

|   |             |             |             |
|---|-------------|-------------|-------------|
| C | 1.59010800  | 0.76609700  | 0.09500900  |
| C | 1.31170400  | -0.35188300 | 0.89697800  |
| C | 2.80439200  | 0.80156400  | -0.60466400 |
| C | 2.20924900  | -1.41273100 | 0.96938400  |
| H | 0.38389200  | -0.37987400 | 1.47072600  |
| C | 3.70021500  | -0.26379700 | -0.53788900 |
| H | 3.04229100  | 1.67595300  | -1.21454100 |
| C | 3.40346000  | -1.37654200 | 0.24720400  |
| H | 1.97867100  | -2.27262900 | 1.60028200  |
| H | 4.63616700  | -0.22175100 | -1.09716700 |
| H | 4.10525800  | -2.20980500 | 0.30587800  |
| C | -0.67166600 | 1.92224900  | -0.01459000 |
| H | -1.16477300 | 2.89935500  | 0.01118900  |
| C | 0.67165000  | 1.92228700  | 0.01461100  |
| H | 1.16470700  | 2.89942000  | -0.01110500 |

#### **TSR-SB**

|   |             |             |             |
|---|-------------|-------------|-------------|
| C | 4.00982500  | 0.11232100  | 0.68055200  |
| C | 2.91042100  | -0.69413700 | 0.92932600  |
| C | 1.74056200  | -0.60101700 | 0.13172100  |
| C | 1.73372700  | 0.34714500  | -0.92398800 |
| C | 2.83986000  | 1.14904100  | -1.16433800 |
| C | 3.98421600  | 1.03895700  | -0.36788500 |
| H | 4.89948300  | 0.02282000  | 1.30608300  |
| H | 2.93387600  | -1.41708500 | 1.74764600  |
| H | 0.83950900  | 0.44261700  | -1.54307800 |
| H | 2.81384200  | 1.87269500  | -1.98070600 |
| H | 4.85063600  | 1.67255400  | -0.56130000 |
| C | -1.74056300 | -0.60101800 | -0.13170300 |
| C | -1.73371500 | 0.34719600  | 0.92395900  |
| C | -2.91043300 | -0.69417900 | -0.92928800 |
| C | -2.83984600 | 1.14910200  | 1.16428500  |
| H | -0.83948900 | 0.44270000  | 1.54303100  |
| C | -4.00983500 | 0.11228900  | -0.68053800 |
| H | -2.93389800 | -1.41716800 | -1.74757200 |
| C | -3.98421400 | 1.03897500  | 0.36785300  |
| H | -2.81381900 | 1.87279600  | 1.98061700  |
| H | -4.89950200 | 0.02275600  | -1.30605200 |
| H | -4.85063200 | 1.67258000  | 0.56125000  |
| C | 0.61353700  | -1.43162700 | 0.39992400  |
| H | 0.68682200  | -2.11782400 | 1.25248300  |
| C | -0.61354100 | -1.43164200 | -0.39987700 |
| H | -0.68683200 | -2.11787900 | -1.25240300 |

#### **E-SB**

|   |             |             |             |
|---|-------------|-------------|-------------|
| C | -4.20028600 | 1.07403100  | 0.17102900  |
| C | -2.82136400 | 1.27018000  | 0.15527600  |
| C | -1.93600200 | 0.19419800  | -0.00987200 |
| C | -2.48052900 | -1.09120300 | -0.17138900 |
| C | -3.85653700 | -1.28855200 | -0.15568300 |
| C | -4.72418900 | -0.20775700 | 0.01715300  |
| H | -4.86787600 | 1.92676100  | 0.30353300  |
| H | -2.41508100 | 2.27673800  | 0.27690800  |
| H | -1.82136200 | -1.94720700 | -0.32192700 |
| H | -4.25836000 | -2.29476800 | -0.28471000 |
| H | -5.80341900 | -0.36629500 | 0.02708700  |
| C | 1.93600200  | -0.19419900 | -0.00986600 |
| C | 2.48052900  | 1.09120200  | -0.17138700 |
| C | 2.82136400  | -1.27017900 | 0.15528900  |
| C | 3.85653800  | 1.28855200  | -0.15567700 |
| H | 1.82136300  | 1.94720500  | -0.32193100 |
| C | 4.20028600  | -1.07403000 | 0.17104700  |
| H | 2.41508000  | -2.27673700 | 0.27692400  |
| C | 4.72418900  | 0.20775800  | 0.01716600  |
| H | 4.25836000  | 2.29476700  | -0.28470700 |
| H | 4.86787500  | -1.92675900 | 0.30355600  |
| H | 5.80341900  | 0.36629600  | 0.02710400  |
| C | 0.48973300  | -0.45957800 | -0.00850300 |
| H | 0.22145300  | -1.52011500 | 0.01084600  |
| C | -0.48973300 | 0.45957700  | -0.00850500 |
| H | -0.22145300 | 1.52011500  | 0.01084300  |

#### **Z-AB**

|   |             |             |             |
|---|-------------|-------------|-------------|
| C | 3.33885600  | -0.41634100 | -0.67455700 |
| C | 2.49562200  | 0.68845600  | -0.75927400 |
| C | 1.39810400  | 0.79151700  | 0.09896800  |
| C | 1.18339000  | -0.17405000 | 1.08881000  |
| C | 2.05085100  | -1.25808700 | 1.18711200  |
| C | 3.11931800  | -1.39124600 | 0.29891600  |
| H | 4.18290600  | -0.50721100 | -1.35969300 |
| H | 2.66734300  | 1.48280200  | -1.48696800 |
| H | 0.34356700  | -0.06918800 | 1.77674100  |
| H | 1.88863500  | -2.00771900 | 1.96292900  |
| H | 3.78992600  | -2.24793400 | 0.37631100  |
| N | 0.61672000  | 1.98717300  | 0.00740900  |
| N | -0.61682200 | 1.98715500  | -0.00755600 |

C -1.39816200 0.79146300 -0.09900200  
C -1.18315900 -0.17434000 -1.08854600  
C -2.49588800 0.68857400 0.75899600  
C -2.05055300 -1.25843700 -1.18679300  
H -0.34315300 -0.06962200 -1.77627700  
C -3.33905900 -0.41627600 0.67434100  
H -2.66781900 1.48309200 1.48645300  
C -3.11924000 -1.39141500 -0.29883600  
H -1.88810700 -2.00826000 -1.96237800  
H -4.18327600 -0.50700900 1.35928900  
H -3.78979400 -2.24814800 -0.37618400

### **TS<sub>I</sub>-AB**

C -1.96906100 -3.98505800 -0.98026300  
C -1.08302400 -2.95780600 -1.27358300  
C -1.07015200 -1.79214200 -0.46435600  
C -1.96590200 -1.70728200 0.63273500  
C -2.83492800 -2.75876800 0.88965900  
C -2.85340300 -3.90720300 0.09671700  
H -1.96399700 -4.87132100 -1.61786300  
H -0.39849900 -3.02719000 -2.11812200  
H -1.96169300 -0.81386700 1.25597800  
H -3.51764600 -2.67104000 1.73713900  
H -3.54261600 -4.72260200 0.31239400  
N -0.22921300 -0.79677100 -0.73017000  
N 0.53667000 0.10860000 -0.98013400  
C 1.83962200 0.04914200 -0.34956100  
C 2.22878600 -0.97549900 0.51775800  
C 2.70393900 1.09523200 -0.66383100  
C 3.50340600 -0.94185100 1.07174600  
H 1.53076000 -1.78317300 0.74707600  
C 3.98052600 1.12220100 -0.10554400  
H 2.35008100 1.86963800 -1.34580600  
C 4.37806200 0.10454400 0.76079900  
H 3.82187200 -1.73398400 1.75076700  
H 4.66542900 1.93633400 -0.34548100  
H 5.37679500 0.12340200 1.19949300

### **E-AB**

C 4.00659300 1.09159100 0.00006200  
C 2.62706900 1.28696700 -0.00001100  
C 1.76543700 0.18753100 -0.00013400  
C 2.28210800 -1.11570000 -0.00001300

C 3.65870000 -1.30316100 0.00012900  
C 4.52287800 -0.20319600 0.00011500  
H 4.67940000 1.95019200 0.00008600  
H 2.18716600 2.28497100 -0.00006100  
H 1.58696500 -1.95447100 -0.00004800  
H 4.06760000 -2.31487500 0.00018900  
H 5.60265000 -0.35997200 0.00021000  
N 0.37756600 0.49039000 -0.00021700  
N -0.37757300 -0.49041300 -0.00017700  
C -1.76544000 -0.18754300 -0.00005900  
C -2.28209400 1.11569500 0.00004200  
C -2.62708300 -1.28696800 -0.00006300  
C -3.65868300 1.30317000 0.00007100  
H -1.58694000 1.95445600 0.00000700  
C -4.00660500 -1.09158000 0.00008500  
H -2.18719100 -2.28497700 -0.00012800  
C -4.52287400 0.20321500 0.00013100  
H -4.06757200 2.31488900 0.00009700  
H -4.67942200 -1.95017300 0.00009200  
H -5.60264400 0.36000300 0.00018700

### **Z-VP**

P 1.01600300 -0.95736500 -0.04560300  
P -1.01602400 -0.95734300 0.04567900  
C 2.91593400 1.00252400 0.06537700  
C 1.61252600 0.75734400 -0.12164700  
H 0.94281000 1.58909500 -0.35511400  
C -2.91574200 1.00251400 -0.06648000  
C -1.61264300 0.75729600 0.12269100  
H -0.94356600 1.58892300 0.35843800  
H 3.32031400 2.01657700 0.00865700  
H 3.62245400 0.19566600 0.28288500  
H -3.32037000 2.01645300 -0.00941600  
H -3.62177100 0.19583600 -0.28623600

### **TS<sub>I</sub>-VP**

P 1.07893600 -0.82177300 0.01071500  
P -0.81690000 -0.23160300 -0.09720900  
C 3.40527500 0.59622700 -0.05833400  
C 2.07670400 0.70986400 0.05724700  
H 1.58876700 1.67860700 0.20237800  
C -3.52799700 0.46954600 -0.29157900  
C -2.45177800 0.17385600 0.44905900

H -2.50246000 0.15034100 1.54319200  
H 4.06764500 1.46371900 0.00142300  
H 3.87887600 -0.37927500 -0.21429700  
H -4.47118800 0.69311000 0.20770300  
H -3.50539700 0.49718300 -1.38134800

#### **TS<sub>R</sub>-VP**

P -0.96700900 -0.75320400 -0.53427000  
P 0.96700800 -0.75320300 0.53427200  
C -3.09175100 0.86659600 0.09816200  
C -1.82925100 0.51032200 0.41093700  
H -1.33198400 1.00414600 1.25309700  
C 3.09175000 0.86659800 -0.09816100  
C 1.82925400 0.51031500 -0.41094300  
H 1.33199200 1.00412600 -1.25311400  
H -3.62284100 1.63553400 0.66395300  
H -3.62649700 0.39688200 -0.73240700  
H 3.62284100 1.63553100 -0.66395800  
H 3.62649000 0.39689700 0.73241800

#### **E-VP**

P 0.75986300 -0.67313900 -0.00022900  
C 3.42780200 -0.01486400 0.00015100  
C 2.17653200 0.46168200 0.00006800  
P -0.75990000 0.67320500 -0.00014400  
C -3.42778100 0.01477200 0.00003800  
C -2.17648100 -0.46171400 0.00002100  
H 2.00809600 1.54468600 0.00048800  
H -2.00800000 -1.54471100 0.00105400  
H 3.62767500 -1.09052700 0.00032000  
H 4.29287400 0.65276100 0.00077900  
H -3.62768600 1.09043000 0.00033500  
H -4.29282600 -0.65288400 0.00096000

#### **E-HP=PH**

P 0.00000000 1.00984800 -0.00001900  
H 1.42521500 1.11377100 0.00027900  
P 0.00000000 -1.00984800 -0.00001900  
H -1.42521500 -1.11377100 0.00027900

#### **TS<sub>R</sub>-HP=PH**

P 1.09811500 -0.06286900 -0.07152600  
P -1.09811500 -0.06286900 0.07152500

H 1.26373300 0.94304100 0.93227700  
H -1.26373300 0.94304200 -0.93227600

#### **TS<sub>I</sub>-HP=PH**

P 1.01727600 -0.09957600 0.00000800  
P -0.95498700 0.00777000 -0.00002100  
H -2.34646200 0.08350600 0.00018100  
H 1.41212200 1.29358400 0.00000000

#### **Z-HP=PH**

P 0.00000000 1.01446100 -0.08803000  
H 0.00001900 1.24239900 1.32044700  
P 0.00000000 -1.01446100 -0.08803000  
H -0.00001900 -1.24239900 1.32044700

#### **[AuCl( $\eta^2$ -E-2b)]**

P -0.70701400 0.78978300 0.57002700  
N -4.72679400 -0.12053100 0.95085000  
N -3.85596100 1.90828200 0.60425100  
C -3.53470600 0.57240500 0.75825300  
C -5.87702400 0.76251900 0.72716700  
H -6.70380600 0.52947200 1.42854100  
H -6.26521400 0.66049300 -0.31481300  
C -5.25640400 2.14716900 0.96644500  
H -5.69984100 2.94300300 0.33617300  
H -5.35453200 2.45662700 2.03451100  
C -4.81594300 -1.53682700 0.76620100  
C -5.02103700 -2.34753600 1.91356000  
C -5.09361500 -3.74174300 1.73424500  
H -5.24951300 -4.39663900 2.60430700  
C -4.95845500 -4.30918300 0.45730900  
H -5.01120100 -5.40271600 0.33589900  
C -4.75294900 -3.49209000 -0.66214000  
H -4.64317100 -3.94942100 -1.65818400  
C -4.68126800 -2.09010800 -0.53401400  
C -5.09064200 -1.70588100 3.29626800  
H -5.56030900 -0.70747800 3.16310200  
C -3.66801200 -1.46123100 3.84560400  
H -3.12971700 -2.42392200 3.97557800  
H -3.71023200 -0.95520100 4.83326100  
H -3.06976400 -0.83073400 3.15775800  
C -5.94473800 -2.49783500 4.29789900  
H -6.95658800 -2.71353700 3.89682200

|   |             |             |             |   |            |             |             |
|---|-------------|-------------|-------------|---|------------|-------------|-------------|
| H | -6.06279300 | -1.92354400 | 5.23984700  | N | 4.41194500 | 0.30095300  | -0.05533400 |
| H | -5.47269400 | -3.46611400 | 4.56814000  | N | 3.58551700 | -1.75688300 | -0.34985300 |
| C | -4.45446400 | -1.22104200 | -1.76702100 | C | 3.31969200 | -0.50994900 | 0.18572400  |
| H | -4.40966800 | -0.16422800 | -1.43533600 | C | 5.54310300 | -0.46826500 | -0.58480900 |
| C | -3.10608600 | -1.53257800 | -2.44028900 | H | 6.06519500 | 0.10222700  | -1.37828600 |
| H | -2.26302700 | -1.37963100 | -1.73568500 | H | 6.28531700 | -0.70730100 | 0.21376100  |
| H | -2.92678000 | -0.86445700 | -3.30714500 | C | 4.84084300 | -1.73196900 | -1.11877900 |
| H | -3.05971000 | -2.57885200 | -2.80790500 | H | 5.42162800 | -2.65800400 | -0.94087700 |
| C | -5.62761500 | -1.33946500 | -2.75933200 | H | 4.63302500 | -1.64846900 | -2.20909700 |
| H | -5.71329600 | -2.36912900 | -3.16611600 | C | 4.44912600 | 1.70111600  | 0.22154200  |
| H | -5.47935700 | -0.65209400 | -3.61811400 | C | 3.76268600 | 2.59854000  | -0.64535300 |
| H | -6.59581300 | -1.08886800 | -2.27780800 | C | 3.85666800 | 3.97435500  | -0.36168200 |
| C | -2.88861400 | 2.94661400  | 0.43374600  | H | 3.33609900 | 4.69339000  | -1.01029000 |
| C | -2.45681400 | 3.25303500  | -0.88765600 | C | 4.60283400 | 4.44498100  | 0.73076200  |
| C | -1.49175500 | 4.26499900  | -1.03829600 | H | 4.67162200 | 5.52784200  | 0.92122000  |
| H | -1.12509200 | 4.51880000  | -2.04236500 | C | 5.23864700 | 3.54202800  | 1.59144900  |
| C | -0.96997900 | 4.94049000  | 0.07651100  | H | 5.79351500 | 3.91745500  | 2.46606000  |
| H | -0.21000200 | 5.72455200  | -0.06731400 | C | 5.15330500 | 2.15311600  | 1.36539400  |
| C | -1.38880800 | 4.60310600  | 1.36896900  | C | 2.95158100 | 2.08001400  | -1.82754600 |
| H | -0.94550500 | 5.11501700  | 2.23766600  | H | 2.44746000 | 1.14675500  | -1.49070700 |
| C | -2.34509800 | 3.58911600  | 1.57315100  | C | 1.83225300 | 3.03231800  | -2.26802300 |
| C | -2.97755700 | 2.45552800  | -2.08148900 | H | 2.22774700 | 3.98149100  | -2.68923900 |
| H | -2.96498700 | 1.38951500  | -1.76266000 | H | 1.23405400 | 2.53974600  | -3.06006600 |
| C | -2.08583000 | 2.56553600  | -3.32370600 | H | 1.15369200 | 3.27435200  | -1.42498100 |
| H | -2.12321700 | 3.58215100  | -3.77025500 | C | 3.84210700 | 1.69942500  | -3.02627000 |
| H | -2.42001200 | 1.84814000  | -4.09927000 | H | 4.64383600 | 0.99058600  | -2.73804000 |
| H | -1.03194400 | 2.31718500  | -3.09641900 | H | 3.22018900 | 1.21476700  | -3.80672300 |
| C | -4.43123100 | 2.82279000  | -2.44049000 | H | 4.32860000 | 2.59819200  | -3.46187500 |
| H | -5.12443200 | 2.67895800  | -1.59056100 | C | 5.76625000 | 1.17037500  | 2.35677600  |
| H | -4.79237900 | 2.19120900  | -3.27871800 | H | 5.47001500 | 0.15194700  | 2.03135000  |
| H | -4.50030100 | 3.88435800  | -2.75931600 | C | 5.18573900 | 1.36666700  | 3.76997600  |
| C | -2.71270900 | 3.14905600  | 2.98588700  | H | 4.08075700 | 1.27811100  | 3.75926900  |
| H | -3.38322600 | 2.26975800  | 2.89630600  | H | 5.58677700 | 0.60040000  | 4.46614400  |
| C | -1.46983100 | 2.67567600  | 3.76405700  | H | 5.44488000 | 2.36318100  | 4.18552000  |
| H | -0.93098300 | 1.88754400  | 3.19928700  | C | 7.30473400 | 1.24443700  | 2.35692800  |
| H | -1.76236400 | 2.26117800  | 4.75133300  | H | 7.65742100 | 2.24166700  | 2.69595800  |
| H | -0.75806300 | 3.50847400  | 3.94482200  | H | 7.73905800 | 0.48385400  | 3.03929900  |
| C | -3.47478300 | 4.25357500  | 3.74260500  | H | 7.71938600 | 1.07474000  | 1.34188100  |
| H | -2.84285900 | 5.15748200  | 3.87395300  | C | 2.97719200 | -2.96276500 | 0.11955900  |
| H | -3.77803900 | 3.90585800  | 4.75249700  | C | 3.23684000 | -3.39759900 | 1.44813800  |
| H | -4.38832100 | 4.56528900  | 3.19484300  | C | 2.62532600 | -4.58773200 | 1.88688800  |
| C | -2.28668300 | -0.02874300 | 0.74469800  | H | 2.80450200 | -4.93892400 | 2.91565600  |
| P | 0.59555200  | -0.94945600 | 0.62492900  | C | 1.80300400 | -5.33529800 | 1.03311200  |

|    |             |             |             |
|----|-------------|-------------|-------------|
| H  | 1.33870400  | -6.26696400 | 1.39351600  |
| C  | 1.56277200  | -4.89360500 | -0.27504500 |
| H  | 0.90019800  | -5.47549000 | -0.93302000 |
| C  | 2.12864500  | -3.69652700 | -0.75285900 |
| C  | 4.14077600  | -2.62168000 | 2.39971300  |
| H  | 4.53313700  | -1.74268000 | 1.85065600  |
| C  | 3.35059000  | -2.08025200 | 3.60538400  |
| H  | 2.93123800  | -2.90621700 | 4.21796000  |
| H  | 4.00600200  | -1.47087100 | 4.26175300  |
| H  | 2.51346700  | -1.44044400 | 3.26147300  |
| C  | 5.35641800  | -3.45996400 | 2.83846100  |
| H  | 5.93182100  | -3.82682400 | 1.96331300  |
| H  | 6.03921200  | -2.85584400 | 3.47252300  |
| H  | 5.04866600  | -4.34727900 | 3.43085000  |
| C  | 1.81597000  | -3.18839900 | -2.15240900 |
| H  | 1.99907900  | -2.09095700 | -2.14092900 |
| C  | 0.34450800  | -3.40196500 | -2.54310300 |
| H  | -0.33351400 | -3.02977800 | -1.74854200 |
| H  | 0.11816400  | -2.83689700 | -3.46896500 |
| H  | 0.11444800  | -4.47390400 | -2.72230100 |
| C  | 2.75327700  | -3.80920000 | -3.20770000 |
| H  | 2.57846600  | -4.90312000 | -3.29508700 |
| H  | 2.56986000  | -3.34860100 | -4.20050100 |
| H  | 3.82294000  | -3.66552500 | -2.95328600 |
| C  | 2.15507300  | -0.08881400 | 0.81267700  |
| H  | -2.31043100 | -1.12894700 | 0.81641800  |
| H  | 2.16712600  | 0.94891300  | 1.18452100  |
| Au | 0.06033400  | -0.03436800 | -1.63584000 |
| Cl | 0.42730400  | -0.05483000 | -3.96809300 |

### TS1-2b

|   |            |             |             |
|---|------------|-------------|-------------|
| P | 0.61621600 | -0.42665000 | 0.80404500  |
| N | 4.61590400 | 0.78719200  | 0.70691300  |
| N | 3.96521700 | -1.35207300 | 0.56928300  |
| C | 3.49671100 | -0.05025900 | 0.66662000  |
| C | 5.82646500 | 0.03483000  | 0.36772400  |
| H | 6.70354600 | 0.40840200  | 0.93472400  |
| H | 6.05981300 | 0.10765900  | -0.72236200 |
| C | 5.41836900 | -1.39234200 | 0.76032300  |
| H | 5.88637600 | -2.16976100 | 0.12334500  |
| H | 5.67778700 | -1.61163500 | 1.82372000  |
| C | 4.51064800 | 2.19977800  | 0.51313900  |
| C | 4.73603800 | 3.04028100  | 1.63620400  |

|   |            |             |             |
|---|------------|-------------|-------------|
| C | 4.61165400 | 4.43148500  | 1.46163600  |
| H | 4.78114300 | 5.10563000  | 2.31455000  |
| C | 4.26132000 | 4.96980700  | 0.21333700  |
| H | 4.16220300 | 6.06066500  | 0.09558300  |
| C | 4.03358500 | 4.12521000  | -0.88104500 |
| H | 3.75300500 | 4.55738400  | -1.85474500 |
| C | 4.15676700 | 2.72643700  | -0.75718100 |
| C | 5.02910400 | 2.42296700  | 3.00023900  |
| H | 5.57778100 | 1.47562800  | 2.81208600  |
| C | 3.70809200 | 2.04079600  | 3.70315500  |
| H | 3.10251700 | 2.94775800  | 3.91409300  |
| H | 3.90875300 | 1.52922000  | 4.66814000  |
| H | 3.09584200 | 1.36547900  | 3.07259300  |
| C | 5.90508700 | 3.30642800  | 3.90109100  |
| H | 6.83938300 | 3.61724500  | 3.38948500  |
| H | 6.18417400 | 2.75672400  | 4.82365200  |
| H | 5.37216400 | 4.22619000  | 4.22312600  |
| C | 3.90348100 | 1.82654700  | -1.96079000 |
| H | 4.03888600 | 0.77835000  | -1.63162600 |
| C | 2.45596000 | 1.94535500  | -2.47258900 |
| H | 1.72263500 | 1.71471900  | -1.67495000 |
| H | 2.27865800 | 1.23355400  | -3.30476900 |
| H | 2.23744800 | 2.96771100  | -2.84593500 |
| C | 4.92519800 | 2.09110700  | -3.08346100 |
| H | 4.82256400 | 3.11797500  | -3.49433900 |
| H | 4.77383500 | 1.37833400  | -3.92088100 |
| H | 5.96768900 | 1.98031300  | -2.71901400 |
| C | 3.11529900 | -2.48732100 | 0.74841100  |
| C | 2.84370600 | -3.30235100 | -0.38436900 |
| C | 1.90186800 | -4.33929500 | -0.23114500 |
| H | 1.62804800 | -4.95655300 | -1.09649000 |
| C | 1.27065500 | -4.56407300 | 1.00293800  |
| H | 0.51730800 | -5.36233000 | 1.08846000  |
| C | 1.58754900 | -3.77814100 | 2.11639900  |
| H | 1.09684900 | -3.97574200 | 3.08181500  |
| C | 2.51820600 | -2.72440700 | 2.01446200  |
| C | 3.56261700 | -3.04696300 | -1.71161500 |
| H | 4.62887600 | -2.86522600 | -1.44731700 |
| C | 3.06181000 | -1.78736700 | -2.45412200 |
| H | 2.08506900 | -1.99124700 | -2.93711100 |
| H | 3.78705000 | -1.49635600 | -3.24369700 |
| H | 2.92694400 | -0.92833100 | -1.77138200 |
| C | 3.51591000 | -4.25458500 | -2.66023700 |

|   |             |             |             |    |             |             |             |
|---|-------------|-------------|-------------|----|-------------|-------------|-------------|
| H | 3.88183000  | -5.18319800 | -2.17523000 | C  | -4.36337800 | 0.97088600  | 2.94876800  |
| H | 4.14689000  | -4.06109600 | -3.55224700 | H  | -4.24908100 | 1.68053300  | 2.10384800  |
| H | 2.47986900  | -4.42604900 | -3.01969300 | C  | -3.02093400 | 0.95936600  | 3.70587000  |
| C | 2.92507100  | -1.92625300 | 3.25066600  | H  | -2.19280100 | 0.62853900  | 3.04787100  |
| H | 3.44098500  | -1.00745000 | 2.90554700  | H  | -2.77612600 | 1.97615100  | 4.07687600  |
| C | 1.72981600  | -1.47130700 | 4.10415900  | H  | -3.05664500 | 0.27991700  | 4.58339100  |
| H | 0.99728400  | -0.91184500 | 3.48687300  | C  | -5.51250100 | 1.48907700  | 3.83524700  |
| H | 2.07318800  | -0.81135200 | 4.92765700  | H  | -5.66302100 | 0.84114600  | 4.72441500  |
| H | 1.20169800  | -2.33144300 | 4.56755400  | H  | -5.29314600 | 2.51398800  | 4.20120100  |
| C | 3.93204900  | -2.73987200 | 4.09136700  | H  | -6.47231500 | 1.51848700  | 3.27886300  |
| H | 3.46358300  | -3.66931600 | 4.47913900  | C  | -2.59433100 | 2.97989000  | -1.54036800 |
| H | 4.29030000  | -2.14902300 | 4.96096400  | C  | -2.23925400 | 4.21302400  | -0.93441100 |
| H | 4.81446100  | -3.04202200 | 3.49015500  | C  | -1.18501400 | 4.94959000  | -1.50507300 |
| C | 2.20100100  | 0.42068000  | 0.71439100  | H  | -0.87538600 | 5.90161400  | -1.04865500 |
| P | -0.58201200 | 1.14442300  | -0.05170200 | C  | -0.51568500 | 4.47759000  | -2.64332300 |
| N | -4.62951600 | 0.47323300  | 0.06413300  | H  | 0.31259200  | 5.06288100  | -3.07286600 |
| N | -3.62888000 | 2.20817000  | -0.91942600 | C  | -0.89094100 | 3.26416900  | -3.23425700 |
| C | -3.40715700 | 1.06471200  | -0.18400300 | H  | -0.35024000 | 2.90027700  | -4.12038300 |
| C | -5.72885500 | 1.35786200  | -0.33342100 | C  | -1.93422200 | 2.48486200  | -2.69754400 |
| H | -6.56590000 | 0.78159700  | -0.77655200 | C  | -2.93275100 | 4.67617700  | 0.34307900  |
| H | -6.12231300 | 1.91776100  | 0.54863400  | H  | -3.94743500 | 4.22360500  | 0.34330100  |
| C | -5.03457500 | 2.28745400  | -1.34206900 | C  | -2.19854700 | 4.12940300  | 1.58538800  |
| H | -5.40301900 | 3.33226500  | -1.30006400 | H  | -1.16164300 | 4.52313600  | 1.63270500  |
| H | -5.14915300 | 1.92015200  | -2.38770600 | H  | -2.72579900 | 4.42670700  | 2.51651100  |
| C | -4.80255800 | -0.61931400 | 0.97076900  | H  | -2.13074900 | 3.02416200  | 1.56022900  |
| C | -5.06652500 | -1.90113800 | 0.42039100  | C  | -3.10246600 | 6.20188700  | 0.42179400  |
| C | -5.23367100 | -2.97668700 | 1.31272700  | H  | -3.59579700 | 6.60727200  | -0.48558300 |
| H | -5.43385400 | -3.98374100 | 0.91802800  | H  | -3.71970500 | 6.47549200  | 1.30240100  |
| C | -5.13161100 | -2.78342600 | 2.69917800  | H  | -2.12739100 | 6.72024200  | 0.53780800  |
| H | -5.26022100 | -3.63847900 | 3.38150800  | C  | -2.30763000 | 1.15293300  | -3.34079400 |
| C | -4.85573300 | -1.51188300 | 3.21955300  | H  | -2.86427200 | 0.55868600  | -2.58651600 |
| H | -4.76565100 | -1.37667900 | 4.30903300  | C  | -1.07283100 | 0.32713100  | -3.74132800 |
| C | -4.68535500 | -0.40220100 | 2.36734600  | H  | -0.35279700 | 0.25079400  | -2.90182400 |
| C | -5.07197900 | -2.10025300 | -1.09105200 | H  | -1.35509400 | -0.71114900 | -4.00608600 |
| H | -5.41624800 | -1.14517800 | -1.54364400 | H  | -0.54607400 | 0.77063500  | -4.61277400 |
| C | -3.63426400 | -2.35103600 | -1.59311100 | C  | -3.23778300 | 1.37138600  | -4.55283100 |
| H | -3.21867600 | -3.28786300 | -1.16993700 | H  | -2.71795800 | 1.94817600  | -5.34699900 |
| H | -3.59998200 | -2.44522700 | -2.69724400 | H  | -3.54666400 | 0.39738300  | -4.98608600 |
| H | -2.94104300 | -1.53521900 | -1.30647200 | H  | -4.15354600 | 1.93696500  | -4.28174100 |
| C | -6.02579100 | -3.20996800 | -1.55957600 | C  | -2.19620200 | 0.52327500  | 0.25681800  |
| H | -7.05469600 | -3.06523600 | -1.16922700 | H  | 2.13146300  | 1.52009800  | 0.76469100  |
| H | -6.07462200 | -3.22740700 | -2.66758500 | H  | -2.31190600 | -0.43665600 | 0.78867200  |
| H | -5.67613400 | -4.21399700 | -1.23952200 | Au | 0.10229800  | -1.80366700 | -0.99923800 |

Cl -0.41032500 -3.24128100 -2.81779700

[AuCl( $\eta^1$ -E-2b)]

P 0.63280300 -0.10739100 0.07550700

N 4.73174600 0.47154200 0.11306500

N 3.71594500 -1.35068700 0.92346400

C 3.49335800 -0.13674300 0.29691300

C 5.81656600 -0.46858300 0.40902700

H 6.67603100 0.04772900 0.88291200

H 6.18144000 -0.96841300 -0.52046400

C 5.11702900 -1.46059300 1.34911000

H 5.48844600 -2.49957200 1.24042400

H 5.23073400 -1.16124100 2.41762800

C 4.90990400 1.59668500 -0.75075200

C 5.15892900 2.86032100 -0.15187600

C 5.32537300 3.97307800 -0.99781700

H 5.51875900 4.96488700 -0.56237300

C 5.23710800 3.83467500 -2.39182000

H 5.36606000 4.71668800 -3.03898200

C 4.98008200 2.58124600 -2.96329000

H 4.90538500 2.48652800 -4.05824700

C 4.81288200 1.43659000 -2.15781700

C 5.16680900 2.99797700 1.36742100

H 5.50329900 2.02146100 1.77638300

C 3.73119500 3.22990200 1.88779900

H 3.32211300 4.18485400 1.49538700

H 3.71862000 3.28014700 2.99694700

H 3.04751100 2.41712600 1.57191200

C 6.12761300 4.08194800 1.87958400

H 7.15297300 3.94548400 1.47814000

H 6.18439500 4.05274000 2.98731100

H 5.78705200 5.10178000 1.60137600

C 4.52116100 0.08385300 -2.79807700

H 4.43164200 -0.66401300 -1.98544500

C 3.17254600 0.08650000 -3.54349700

H 2.34200800 0.35071300 -2.85962200

H 2.95828800 -0.92008500 -3.95793500

H 3.17598300 0.80800900 -4.38784700

C 5.67668800 -0.36678800 -3.71237200

H 5.80023300 0.31532600 -4.58001300

H 5.48149400 -1.38374500 -4.11196000

H 6.64235700 -0.38928000 -3.16565200

C 2.66708100 -2.10476100 1.54046500

C 2.31698700 -3.35418400 0.96299500

C 1.21188400 -4.03795900 1.50748200

H 0.87852500 -4.98095800 1.05525200

C 0.49614600 -3.50384100 2.59081800

H -0.38374700 -4.04122100 2.97649200

C 0.88848200 -2.29349400 3.17331200

H 0.33075200 -1.89489700 4.03375200

C 1.98146800 -1.56636900 2.66211400

C 3.11077500 -3.90901800 -0.22186700

H 4.18459400 -3.74718600 0.02480800

C 2.83372800 -3.15868700 -1.54379500

H 1.82514800 -3.41385200 -1.92767700

H 3.58046400 -3.45180400 -2.31200400

H 2.87842800 -2.06088400 -1.41900600

C 2.90024200 -5.41644100 -0.43077300

H 3.09561200 -5.99849400 0.49351500

H 3.58209500 -5.78958600 -1.22239700

H 1.86249100 -5.62443200 -0.76546100

C 2.44353500 -0.28574600 3.35269600

H 3.13388700 0.24266600 2.66438000

C 1.29274400 0.68662000 3.66263300

H 0.71872200 0.93016500 2.74672500

H 1.69152400 1.63195200 4.08502500

H 0.58594800 0.26440300 4.40745100

C 3.23371000 -0.63490500 4.63205700

H 2.58239600 -1.14798200 5.37099200

H 3.63543300 0.28311800 5.11078900

H 4.08424900 -1.31421900 4.41609600

C 2.30329800 0.44661300 -0.10636800

P -0.59030300 1.58653000 0.02213400

N -4.50846800 0.28596900 -0.08114900

N -3.90247100 2.44196400 0.05512900

C -3.42281600 1.14737800 -0.04770000

C -5.74843300 1.01176500 0.20497300

H -6.58993600 0.62832200 -0.40715600

H -6.03056200 0.91341500 1.28086200

C -5.35792600 2.45857600 -0.14881900

H -5.84535100 3.21280500 0.50191900

H -5.60738100 2.70304400 -1.20848700

C -4.34671500 -1.11933200 0.15601000

C -4.45703000 -2.00406100 -0.94736300

C -4.25558900 -3.37693200 -0.71810800

H -4.29536900 -4.08086100 -1.56108400



C -3.94093300 -3.85417900 0.56103100  
H -3.75508500 -4.92825500 0.71113700  
C -3.80964700 -2.96280400 1.63255800  
H -3.52980800 -3.34486200 2.62719800  
C -4.00162300 -1.57881300 1.45345300  
C -4.65696100 -1.46361800 -2.35812100  
H -5.12357400 -0.45964700 -2.26070300  
C -3.28103700 -1.27208400 -3.03454000  
H -2.73303000 -2.23582100 -3.08846100  
H -3.40101900 -0.87098500 -4.06351100  
H -2.64519200 -0.56886000 -2.46011600  
C -5.58559500 -2.33827500 -3.21563100  
H -6.55981400 -2.51597700 -2.71459900  
H -5.78294500 -1.84979400 -4.19255500  
H -5.13082300 -3.32710400 -3.43399500  
C -3.77612200 -0.62438800 2.62137200  
H -3.91800600 0.41200800 2.25315700  
C -2.32576100 -0.72371600 3.13059800  
H -1.59883200 -0.55622900 2.31135300  
H -2.13346400 0.02884800 3.92312300  
H -2.12185900 -1.72711800 3.55847600  
C -4.79481000 -0.85658700 3.75342400  
H -4.69099200 -1.87331000 4.18785600  
H -4.64496100 -0.12388900 4.57434800  
H -5.83789900 -0.75743600 3.38725900  
C -3.06934600 3.57100200 -0.22642100  
C -2.70172200 4.41047600 0.85760300  
C -1.82614400 5.48062100 0.59774200  
H -1.51546200 6.14280600 1.41958200  
C -1.33080900 5.70439400 -0.69588100  
H -0.63754900 6.54035900 -0.87976300  
C -1.71224300 4.86947700 -1.75411100  
H -1.31572400 5.05570700 -2.76446100  
C -2.58981500 3.78714800 -1.54519400  
C -3.19102100 4.09757800 2.26834500  
H -4.17932600 3.60111700 2.16314400  
C -2.25169800 3.08107600 2.95079800  
H -1.23101600 3.50245800 3.06405900  
H -2.63033800 2.81079600 3.95915600  
H -2.15938400 2.15281000 2.35446600  
C -3.38397600 5.34894700 3.13884600  
H -4.02622900 6.10309500 2.63887900  
H -3.85930100 5.07604500 4.10359200

H -2.41593900 5.83538400 3.38295300  
C -2.99725000 2.89574800 -2.71480600  
H -3.55483300 2.02858100 -2.30714300  
C -1.77954100 2.32357300 -3.46312500  
H -1.10644500 1.78067900 -2.76931200  
H -2.10885000 1.61172700 -4.24735100  
H -1.19037300 3.12262000 -3.96067900  
C -3.94269100 3.65181700 -3.67071900  
H -3.43242100 4.52328400 -4.13301100  
H -4.28614900 2.98644100 -4.49035500  
H -4.83792000 4.03647000 -3.13907700  
C -2.11542500 0.70059400 -0.12126900  
H 2.41817200 1.44226200 -0.56135300  
H -2.04210100 -0.39932700 -0.22969500  
Au -0.21043800 -2.11801200 -0.57195600  
Cl -1.00072100 -4.14181200 -1.46220200

#### TS2-2b

P 0.65857300 -2.11754400 0.32438500  
P -1.00163700 -0.76333000 -0.19423500  
N -3.14902400 0.48028000 3.13519700  
N -3.72325400 1.03318900 1.03584100  
N 4.19352200 0.02582200 0.17751100  
N 3.99621700 -2.17222000 0.57551300  
C 1.90095000 -0.83999200 0.35225000  
H 1.59402900 0.20369600 0.18275900  
C 3.28231200 -1.00541300 0.38214900  
C -1.70046000 -0.40626800 1.38837200  
H -1.10550500 -0.79314200 2.23071400  
C -2.80718800 0.33427200 1.79228400  
C 5.42829700 -1.88604500 0.70500500  
H 6.04071300 -2.67901300 0.22988400  
H 5.72333000 -1.81679000 1.77951400  
C 5.54248900 -0.52755500 -0.00454200  
H 6.31485800 0.13304600 0.43978200  
H 5.77416600 -0.64985300 -1.08946800  
C -4.50893300 1.03036000 3.23301600  
H -4.61971600 1.67304100 4.12689500  
H -5.26486800 0.21169200 3.29100200  
C -4.61883300 1.80212700 1.91258700  
H -5.65017000 1.83270600 1.50899600  
H -4.25374700 2.85109000 2.01680700  
C 3.39749000 -3.37843100 1.05704200

|   |            |             |             |   |             |             |             |
|---|------------|-------------|-------------|---|-------------|-------------|-------------|
| C | 3.27346100 | -4.46479500 | 0.15169800  | C | 1.65194000  | -0.09849000 | -3.06187800 |
| C | 2.62843100 | -5.63048000 | 0.60380100  | H | 0.95073000  | -0.08720500 | -2.20417500 |
| H | 2.50084600 | -6.48138900 | -0.08304500 | H | 1.50962500  | -1.06237500 | -3.59153600 |
| C | 2.12061600 | -5.71057100 | 1.90863600  | H | 1.35034700  | 0.71289000  | -3.75702900 |
| H | 1.60501600 | -6.62543400 | 2.24061100  | C | -3.18606700 | -3.44471000 | 2.26594900  |
| C | 2.25853400 | -4.62908600 | 2.78923800  | H | -2.26995100 | -3.03926500 | 1.79321600  |
| H | 1.84957500 | -4.70241600 | 3.80912400  | H | -3.84863800 | -3.80751200 | 1.45367200  |
| C | 2.90079000 | -3.44242300 | 2.38660900  | H | -2.89857400 | -4.31929900 | 2.88687300  |
| C | 4.06614900 | -2.62533600 | 4.47004300  | C | -3.90523300 | -2.36923600 | 3.10388600  |
| H | 3.71555700 | -3.48099000 | 5.08511600  | H | -4.20105200 | -1.56803700 | 2.39956100  |
| H | 4.21804500 | -1.76014200 | 5.14938200  | C | -5.19745700 | -2.91410300 | 3.74226800  |
| H | 5.05083200 | -2.90661300 | 4.04209000  | H | -4.98674300 | -3.75663200 | 4.43438100  |
| C | 3.04723700 | -2.28058800 | 3.36475200  | H | -5.88737400 | -3.28936000 | 2.95814700  |
| H | 3.44484300 | -1.41143600 | 2.80224800  | H | -5.72722200 | -2.13043300 | 4.32322200  |
| C | 1.69515000 | -1.84600200 | 3.95958200  | C | -2.97581400 | -1.76415100 | 4.15057600  |
| H | 0.97659100 | -1.59248600 | 3.15446100  | C | -2.42866600 | -2.59309100 | 5.15021100  |
| H | 1.82328300 | -0.95508800 | 4.60860900  | H | -2.69817300 | -3.66076200 | 5.16956900  |
| H | 1.23671000 | -2.64213600 | 4.58209900  | C | -1.54575700 | -2.08220700 | 6.10928500  |
| C | 4.58707700 | -5.54271700 | -1.74659400 | H | -1.12902000 | -2.74353300 | 6.88516100  |
| H | 5.44709400 | -5.71990200 | -1.06774600 | C | -1.18129400 | -0.72928800 | 6.07102000  |
| H | 4.98255400 | -5.37586700 | -2.77017100 | H | -0.46752100 | -0.33172400 | 6.81055900  |
| H | 3.98566200 | -6.47564700 | -1.77810300 | C | -2.61052600 | -0.38919200 | 4.14251600  |
| C | 3.74520500 | -4.33785100 | -1.29244200 | C | -1.69317100 | 0.14257300  | 5.08859500  |
| H | 4.38788500 | -3.43411300 | -1.34321800 | C | -0.16593200 | 1.75282600  | 3.87352000  |
| C | 2.54838800 | -4.08891800 | -2.23318400 | H | 0.63706400  | 0.99107600  | 3.89714500  |
| H | 1.86245500 | -4.96187800 | -2.24587600 | H | 0.30689900  | 2.75612800  | 3.91436800  |
| H | 2.89548800 | -3.90968900 | -3.27252000 | H | -0.68025500 | 1.65638000  | 2.89731900  |
| H | 1.95305200 | -3.21399700 | -1.89953400 | C | -1.14900300 | 1.57049900  | 5.04630800  |
| C | 3.81407700 | 1.26947100  | -0.42405300 | H | -0.55742000 | 1.67551400  | 5.98279700  |
| C | 3.30256600 | 1.30976400  | -1.74845500 | C | -2.20144300 | 2.69399300  | 5.06845000  |
| C | 2.95983500 | 2.57101300  | -2.27874300 | H | -2.69468500 | 2.80446900  | 4.08338700  |
| H | 2.55669700 | 2.63084100  | -3.30180600 | H | -1.71372900 | 3.66338000  | 5.30185700  |
| C | 3.12432500 | 3.74301000  | -1.53020700 | H | -2.97973400 | 2.51455500  | 5.83866900  |
| H | 2.85455600 | 4.71691400  | -1.96826500 | C | -3.51903100 | 1.36080000  | -0.34474400 |
| C | 3.62084000 | 3.68043000  | -0.21876300 | C | -2.41238400 | 2.16984700  | -0.71832300 |
| H | 3.73011300 | 4.60653400  | 0.36444700  | C | -2.18532600 | 2.37535800  | -2.09362100 |
| C | 3.96557700 | 2.44512300  | 0.35892700  | H | -1.32139800 | 2.97759700  | -2.41332000 |
| C | 3.20693100 | 1.91538700  | 2.68805400  | C | -3.03825400 | 1.81952100  | -3.05361500 |
| H | 2.42801700 | 2.70530600  | 2.66889700  | H | -2.83194300 | 1.96533400  | -4.12497800 |
| H | 3.51395600 | 1.76204800  | 3.74414100  | C | -4.15353000 | 1.06411100  | -2.66116400 |
| H | 2.74092300 | 0.97857400  | 2.32285200  | H | -4.79606900 | 0.61703400  | -3.43015100 |
| C | 3.11467500 | 0.05862400  | -2.60238200 | C | -4.41781400 | 0.81435400  | -1.30100500 |
| H | 3.35188000 | -0.82557200 | -1.97784700 | C | -5.20582200 | -1.43561500 | -0.35372700 |

|    |             |             |             |
|----|-------------|-------------|-------------|
| H  | -4.91083600 | -2.07629500 | -1.20888700 |
| H  | -6.05978200 | -1.91735900 | 0.16826900  |
| H  | -4.34885300 | -1.39510400 | 0.34363500  |
| C  | -5.61240700 | -0.03242500 | -0.85584300 |
| H  | -6.07130300 | 0.50384100  | 0.00542300  |
| C  | -6.69082900 | -0.16870000 | -1.94152400 |
| H  | -7.02074300 | 0.81636500  | -2.33140300 |
| H  | -7.57914700 | -0.69120000 | -1.53071100 |
| H  | -6.31442700 | -0.77677100 | -2.79020900 |
| C  | -1.98024000 | 4.33397400  | 0.49189900  |
| H  | -1.84234900 | 4.90674100  | -0.44950300 |
| H  | -1.38744900 | 4.83350400  | 1.28722000  |
| H  | -3.05361100 | 4.40251500  | 0.76525200  |
| C  | -1.53179400 | 2.86812700  | 0.31383400  |
| H  | -1.67794300 | 2.35824000  | 1.28674200  |
| C  | -0.03315400 | 2.78451100  | -0.01441500 |
| H  | 0.26864700  | 1.73409600  | -0.20203600 |
| H  | 0.57837100  | 3.17510400  | 0.82420200  |
| H  | 0.23394200  | 3.37489900  | -0.91421800 |
| C  | 4.40966300  | 2.32884300  | 1.81407300  |
| C  | 5.08457700  | 3.59455700  | 2.36160200  |
| H  | 4.36903100  | 4.43975000  | 2.44588300  |
| H  | 5.92586200  | 3.92458300  | 1.71794800  |
| H  | 5.48341900  | 3.40713800  | 3.37975500  |
| C  | 4.08827600  | 0.05324200  | -3.79792800 |
| H  | 3.89027100  | 0.90210800  | -4.48595800 |
| H  | 3.98068200  | -0.88465200 | -4.38168700 |
| H  | 5.14410500  | 0.13440700  | -3.46460900 |
| Au | -2.22910700 | -1.50953800 | -1.93741200 |
| Cl | -3.52060600 | -2.35441300 | -3.70199100 |
| H  | 5.14884000  | 1.50110300  | 1.86646200  |

[AuCl( $\eta^1$ -Z-2b)]

|   |             |             |             |
|---|-------------|-------------|-------------|
| P | 0.62682300  | -1.87333500 | -0.36714800 |
| P | -1.12615100 | -0.76725700 | -0.32082900 |
| N | -1.55033400 | 3.34692100  | -0.07430300 |
| N | -3.09093500 | 1.94861300  | -0.89458200 |
| N | 4.30921200  | -0.09523900 | 0.20543200  |
| N | 3.77939800  | -2.24843500 | 0.47557700  |
| C | 1.96928400  | -0.69474000 | -0.27911400 |
| H | 1.79611300  | 0.37308600  | -0.48952900 |
| C | 3.27229700  | -1.01273300 | 0.09404300  |
| C | -0.95496100 | 0.96959400  | -0.01818200 |

|   |             |             |             |
|---|-------------|-------------|-------------|
| H | 0.01133000  | 1.29104500  | 0.40314200  |
| C | -1.83581200 | 2.00313100  | -0.31221400 |
| C | 5.12122100  | -2.10749500 | 1.05181800  |
| H | 5.76813900  | -2.96225800 | 0.76773800  |
| H | 5.07273200  | -2.06619000 | 2.16548800  |
| C | 5.58571400  | -0.77359000 | 0.45620100  |
| H | 6.22161100  | -0.18327600 | 1.14689600  |
| H | 6.15196400  | -0.91792200 | -0.49532300 |
| C | -2.76758100 | 4.15580000  | -0.24165300 |
| H | -2.52400500 | 5.16110500  | -0.63547000 |
| H | -3.29827200 | 4.27952200  | 0.73222200  |
| C | -3.57364300 | 3.29683800  | -1.21539800 |
| H | -4.66911500 | 3.37481500  | -1.06618600 |
| H | -3.34817500 | 3.55396300  | -2.27746700 |
| C | 2.94774600  | -3.36553500 | 0.81168100  |
| C | 2.89746800  | -4.45006300 | -0.10162200 |
| C | 2.00805600  | -5.50327100 | 0.17713300  |
| H | 1.92700500  | -6.34921100 | -0.52129200 |
| C | 1.20402000  | -5.47902900 | 1.32712000  |
| H | 0.49552100  | -6.30008900 | 1.51718800  |
| C | 1.29489600  | -4.41569300 | 2.23426000  |
| H | 0.65616800  | -4.41095300 | 3.13063000  |
| C | 2.16974300  | -3.33730100 | 1.99996800  |
| C | 2.97960400  | -2.61677900 | 4.27712500  |
| H | 2.41707200  | -3.41612800 | 4.80403100  |
| H | 3.08861900  | -1.76168600 | 4.97707500  |
| H | 3.99168200  | -3.01590300 | 4.05669700  |
| C | 2.24572100  | -2.18090200 | 2.99202100  |
| H | 2.84035100  | -1.37022100 | 2.52334400  |
| C | 0.86135400  | -1.58859300 | 3.31282200  |
| H | 0.32888900  | -1.28961000 | 2.38806800  |
| H | 0.96603300  | -0.69489000 | 3.96149300  |
| H | 0.21552800  | -2.31543100 | 3.84790800  |
| C | 4.15526600  | -5.81342600 | -1.86225400 |
| H | 4.64505300  | -6.39790600 | -1.05631500 |
| H | 4.86754800  | -5.72792500 | -2.70877600 |
| H | 3.28755700  | -6.40126800 | -2.22877200 |
| C | 3.73400600  | -4.41710800 | -1.37791100 |
| H | 4.65919700  | -3.84852200 | -1.14046600 |
| C | 3.00516500  | -3.63903300 | -2.49395100 |
| H | 2.04476800  | -4.13106500 | -2.75280700 |
| H | 3.63089900  | -3.59196600 | -3.41050300 |
| H | 2.76940100  | -2.60314600 | -2.18097300 |

C 4.30396600 1.21995300 -0.35121500  
C 4.43986300 1.40081200 -1.75107000  
C 4.55164700 2.71997900 -2.23631400  
H 4.65684800 2.89109700 -3.31923400  
C 4.53685400 3.81254000 -1.36006600  
H 4.64219200 4.83485800 -1.75639900  
C 4.37822300 3.61271000 0.02069200  
H 4.35929200 4.47903900 0.69582900  
C 4.25045400 2.31597200 0.55181500  
C 2.54338000 1.72185100 2.31040600  
H 1.88694500 2.55567100 1.99529300  
H 2.37399600 1.54760000 3.39311400  
H 2.22541400 0.81262500 1.76577500  
C 4.44298700 0.22056100 -2.71612600  
H 4.42001800 -0.71030200 -2.11387300  
C 3.16711300 0.21956900 -3.57981800  
H 2.26133900 0.18709000 -2.94414700  
H 3.14623400 -0.66798400 -4.24537800  
H 3.11152600 1.12615200 -4.21917000  
C -1.33223500 1.61831300 3.48335200  
H -0.74919100 1.01380400 2.76215000  
H -2.16454200 0.98562800 3.85445200  
H -0.67551000 1.86479700 4.34457800  
C -1.88055000 2.89421900 2.81427700  
H -2.52673100 2.55680700 1.98098300  
C -2.76318400 3.70886500 3.77695100  
H -2.20349100 4.02625100 4.68198100  
H -3.62489500 3.09844100 4.11757800  
H -3.15979600 4.62444100 3.29064200  
C -0.74363800 3.72152800 2.22568700  
C 0.15759600 4.38722200 3.08074600  
H 0.01534500 4.32196100 4.17076300  
C 1.22090000 5.13737200 2.56260100  
H 1.89785000 5.67664100 3.24354300  
C 1.43769600 5.17885600 1.17755200  
H 2.29363100 5.73906300 0.77034000  
C -0.54170100 3.82851300 0.82205300  
C 0.57824300 4.51440400 0.27934500  
C 1.18674000 3.11966600 -1.76105100  
H 1.92589500 2.58087600 -1.13775400  
H 1.59823800 3.17799300 -2.78911800  
H 0.26329400 2.51141200 -1.79486400  
C 0.91869400 4.53202000 -1.21014100

H 1.87998400 5.08754200 -1.27314400  
C -0.09080900 5.29055900 -2.09293200  
H -1.02598400 4.71067700 -2.21955700  
H 0.33557600 5.45164900 -3.10506400  
H -0.34435500 6.28432800 -1.66935700  
C -3.61245000 0.79876600 -1.56906600  
C -2.98650200 0.34155200 -2.75831200  
C -3.47324600 -0.84535300 -3.34047800  
H -2.99577500 -1.23679400 -4.25192300  
C -4.54871600 -1.53454200 -2.76859400  
H -4.89905700 -2.47739600 -3.21573500  
C -5.18434100 -1.03719200 -1.61992400  
H -6.01505200 -1.60292900 -1.17903900  
C -4.73422600 0.14274500 -0.99632400  
C -4.57500600 0.51510900 1.54322500  
H -4.60471700 -0.54541800 1.86497700  
H -4.99070900 1.13981900 2.36229100  
H -3.51408500 0.79243900 1.39907900  
C -5.40935000 0.70611200 0.25678800  
H -5.50153100 1.80331200 0.08892600  
C -6.82350000 0.14759500 0.47700000  
H -7.46748100 0.27192400 -0.41798700  
H -7.31048100 0.66966800 1.32624600  
H -6.78032400 -0.93132100 0.73414800  
C -2.43779400 1.88810300 -4.66441100  
H -2.79788200 1.17595800 -5.43673700  
H -1.65608600 2.52716700 -5.12690300  
H -3.29590800 2.53524000 -4.38802000  
C -1.87600800 1.13540800 -3.43983300  
H -1.51284500 1.89687600 -2.72051700  
C -0.66162500 0.27583900 -3.82674800  
H -0.26480700 -0.27185700 -2.94868900  
H 0.14709400 0.91528700 -4.23616400  
H -0.91840600 -0.47314000 -4.60518200  
C 4.02602700 2.06167500 2.03969300  
C 4.50040400 3.21294800 2.93733100  
H 3.87628100 4.11912300 2.79752800  
H 5.55739700 3.48616700 2.73845800  
H 4.41515000 2.92365400 4.00468900  
C 5.71805800 0.18440100 -3.57873500  
H 5.78376800 1.06632800 -4.25026300  
H 5.72803500 -0.72186200 -4.21933100  
H 6.63327300 0.17364700 -2.95108300

Au -2.85278500 -2.07952700 0.32468000  
Cl -4.60939900 -3.37670800 1.15605700  
H 4.61857400 1.15819700 2.30383500

### TS3-2b

P 0.73880500 -1.75103900 -0.71329100  
P -1.06502800 -0.71879100 -0.54775100  
N -1.59229500 3.34474400 -0.03018400  
N -3.13479700 1.88559900 -0.72038700  
N 4.35909600 -0.00107000 0.16388100  
N 3.80180100 -2.16039700 0.35490600  
C 2.04822000 -0.57356900 -0.45169800  
H 1.86898400 0.50665300 -0.57582600  
C 3.33096800 -0.91129900 -0.02581100  
C -0.91346400 0.97769200 -0.02349500  
H 0.06133300 1.30580800 0.37242900  
C -1.83977800 1.98909000 -0.23834100  
C 5.10817700 -2.03928100 1.01334500  
H 5.76943800 -2.88963400 0.75009800  
H 4.99153400 -2.02187800 2.12248600  
C 5.61506600 -0.69307700 0.47687800  
H 6.21304300 -0.12505600 1.21834200  
H 6.23469400 -0.81901600 -0.44321500  
C -2.84482900 4.10992900 -0.12328500  
H -2.66165600 5.11288200 -0.55485300  
H -3.30941900 4.24157600 0.88286200  
C -3.69378800 3.20588600 -1.02063600  
H -4.77584300 3.24181600 -0.78190700  
H -3.56726200 3.46175800 -2.09924400  
C 2.91779600 -3.26274400 0.60935800  
C 2.89681800 -4.32328600 -0.33240900  
C 1.91561500 -5.31960100 -0.17948600  
H 1.85542000 -6.14171200 -0.90820000  
C 0.98415200 -5.25657300 0.86829400  
H 0.18932300 -6.01389900 0.94706200  
C 1.04884900 -4.22610100 1.81460500  
H 0.29992300 -4.18879900 2.61977500  
C 2.02450700 -3.21479800 1.71566600  
C 2.72386900 -2.64768200 4.06242100  
H 2.08849100 -3.43994700 4.51113700  
H 2.83608400 -1.83621500 4.81219200  
H 3.72446100 -3.09159800 3.87775500  
C 2.08996200 -2.10810500 2.76264400

H 2.75189800 -1.30735600 2.37245500  
C 0.72212500 -1.46115600 3.03772600  
H 0.27752200 -1.04978600 2.11064200  
H 0.83100800 -0.63723000 3.77191100  
H -0.00783700 -2.18610000 3.45274000  
C 4.27648500 -5.71974600 -1.97068000  
H 4.67314200 -6.31760200 -1.12441400  
H 5.06531800 -5.65522100 -2.74856700  
H 3.42923500 -6.28270000 -2.41552800  
C 3.85254900 -4.31212100 -1.52228300  
H 4.76789800 -3.77255200 -1.19653600  
C 3.25416500 -3.51005000 -2.69680700  
H 2.31518400 -3.98037200 -3.05535400  
H 3.96862000 -3.46474000 -3.54621200  
H 3.00578900 -2.47397500 -2.39449400  
C 4.36321500 1.31852600 -0.38443200  
C 4.48768700 1.51255300 -1.78414900  
C 4.55716800 2.83810600 -2.26028200  
H 4.65011700 3.01900200 -3.34273500  
C 4.51469300 3.92460200 -1.37743800  
H 4.58508600 4.95211900 -1.76812100  
C 4.37390300 3.71061800 0.00291600  
H 4.33311100 4.57043100 0.68507700  
C 4.28411200 2.40731400 0.52495400  
C 2.56913500 1.79301500 2.26161200  
H 1.91393800 2.63021100 1.95216500  
H 2.38941700 1.60135700 3.33964100  
H 2.25867400 0.89129100 1.70054200  
C 4.53037900 0.34389800 -2.76258400  
H 4.49516600 -0.59488500 -2.17367100  
C 3.28979400 0.34202100 -3.67713800  
H 2.35827000 0.29439300 -3.07955300  
H 3.30607300 -0.53854200 -4.35201200  
H 3.25276500 1.25398600 -4.30995300  
C -1.06255400 1.81102600 3.58647100  
H -0.52685400 1.17509000 2.85617600  
H -1.83787000 1.18473800 4.07278100  
H -0.33958400 2.13110900 4.36641300  
C -1.70305100 3.02359500 2.88438400  
H -2.38664000 2.61399200 2.11475800  
C -2.54962100 3.86600500 3.85540900  
H -1.94272300 4.25508400 4.70001400  
H -3.36475900 3.25066100 4.28931900

|   |             |             |             |
|---|-------------|-------------|-------------|
| H | -3.00970100 | 4.73789600  | 3.34526600  |
| C | -0.63223600 | 3.84806100  | 2.17833300  |
| C | 0.30885300  | 4.57263800  | 2.93687700  |
| H | 0.24062200  | 4.56217300  | 4.03593700  |
| C | 1.32296400  | 5.30826600  | 2.31077600  |
| H | 2.03210200  | 5.89512700  | 2.91543100  |
| C | 1.44625100  | 5.27995600  | 0.91412000  |
| H | 2.26104200  | 5.83282600  | 0.42183300  |
| C | -0.52838200 | 3.88557600  | 0.76082600  |
| C | 0.53894400  | 4.56138000  | 0.10938100  |
| C | 1.08731100  | 3.10285000  | -1.90552200 |
| H | 1.89602700  | 2.63723500  | -1.30920100 |
| H | 1.42894100  | 3.13514200  | -2.96052000 |
| H | 0.19970200  | 2.44300700  | -1.85031200 |
| C | 0.77602800  | 4.52403600  | -1.39999500 |
| H | 1.69838200  | 5.12629300  | -1.55463800 |
| C | -0.33218700 | 5.18510100  | -2.24185600 |
| H | -1.24193500 | 4.55384400  | -2.27115400 |
| H | 0.01278300  | 5.31599400  | -3.28877000 |
| H | -0.60747100 | 6.18529600  | -1.84796500 |
| C | -3.69903400 | 0.67273500  | -1.22575800 |
| C | -3.29403400 | 0.18708100  | -2.49828400 |
| C | -3.78125000 | -1.07057700 | -2.90483500 |
| H | -3.47491200 | -1.48220800 | -3.87848000 |
| C | -4.61278200 | -1.82145000 | -2.06501300 |
| H | -4.94511900 | -2.82417700 | -2.37437100 |
| C | -5.02173100 | -1.31091600 | -0.82201700 |
| H | -5.67071900 | -1.91830400 | -0.17550200 |
| C | -4.59341800 | -0.04089700 | -0.38850700 |
| C | -4.05102400 | 0.17124000  | 2.09258900  |
| H | -4.09381600 | -0.91508500 | 2.31514400  |
| H | -4.31395200 | 0.72698200  | 3.01800000  |
| H | -3.00354200 | 0.41131800  | 1.82492700  |
| C | -5.02592200 | 0.54012200  | 0.95543700  |
| H | -4.98800400 | 1.64564000  | 0.84474000  |
| C | -6.46697400 | 0.15748300  | 1.33036200  |
| H | -7.18242600 | 0.39360500  | 0.51561200  |
| H | -6.78491200 | 0.70671400  | 2.24072000  |
| H | -6.55212100 | -0.92503000 | 1.55955000  |
| C | -3.25609200 | 1.73132800  | -4.48367400 |
| H | -3.74451100 | 0.99196800  | -5.15313900 |
| H | -2.62927900 | 2.39897700  | -5.11182400 |
| H | -4.06158700 | 2.34139000  | -4.02528600 |

|    |             |             |             |
|----|-------------|-------------|-------------|
| C  | -2.40036700 | 1.01749900  | -3.41550300 |
| H  | -1.91809800 | 1.79765800  | -2.78993500 |
| C  | -1.26843700 | 0.20537400  | -4.06734200 |
| H  | -0.67740000 | -0.33504400 | -3.30072600 |
| H  | -0.58665900 | 0.87831200  | -4.62766200 |
| H  | -1.66021700 | -0.54278100 | -4.78825500 |
| C  | 4.05279200  | 2.14063200  | 2.00928700  |
| C  | 4.51147200  | 3.28873100  | 2.91917300  |
| H  | 3.87866000  | 4.18963400  | 2.78385100  |
| H  | 5.56658200  | 3.57420600  | 2.72767900  |
| H  | 4.42386900  | 2.98953700  | 3.98361900  |
| C  | 5.83856000  | 0.33029800  | -3.57592400 |
| H  | 5.92386100  | 1.22469200  | -4.22854600 |
| H  | 5.88010800  | -0.56518300 | -4.23039600 |
| H  | 6.72842400  | 0.31500600  | -2.91293200 |
| Au | -2.28501700 | -2.29232200 | 0.57863100  |
| Cl | -3.33773800 | -3.86485400 | 1.94744500  |
| H  | 4.64760800  | 1.23927500  | 2.27400900  |

[AuCl( $\eta^2$ -Z-**2b**)]

|    |             |             |             |
|----|-------------|-------------|-------------|
| Au | 0.07071200  | -2.50975500 | 0.76728300  |
| Cl | 0.04762700  | -3.72399500 | 2.79236500  |
| P  | 0.95058200  | -1.31108700 | -1.19123400 |
| P  | -1.19642800 | -1.26497700 | -0.97434100 |
| N  | -3.22993200 | 1.95084200  | 0.58945000  |
| N  | -4.09490000 | 0.29354100  | -0.62220900 |
| N  | 3.57433800  | 1.74972100  | -0.69674200 |
| N  | 3.99153800  | -0.44862700 | -0.73642300 |
| C  | 1.61601400  | 0.25871000  | -0.66940700 |
| H  | 0.97510800  | 1.12743500  | -0.44937600 |
| C  | 2.98352100  | 0.49876100  | -0.69527000 |
| C  | -1.62698400 | 0.28386700  | -0.21180200 |
| H  | -0.85336800 | 0.91276000  | 0.25803000  |
| C  | -2.91768600 | 0.79019700  | -0.09509600 |
| C  | 5.30412200  | 0.17828000  | -0.93343000 |
| H  | 5.66444600  | 0.03488200  | -1.97801300 |
| H  | 6.05068800  | -0.27370400 | -0.25033500 |
| C  | 5.03681200  | 1.66851800  | -0.62148900 |
| H  | 5.41240600  | 1.95519200  | 0.38776100  |
| H  | 5.50134400  | 2.35104100  | -1.36221200 |
| C  | -4.64184300 | 2.31036900  | 0.42408200  |
| H  | -4.76127100 | 3.13422500  | -0.31782300 |
| H  | -5.07396800 | 2.64958500  | 1.38649300  |

|   |             |             |             |   |             |             |             |
|---|-------------|-------------|-------------|---|-------------|-------------|-------------|
| C | -5.26330300 | 1.00108200  | -0.09144100 | H | 2.71833400  | 2.80698700  | 3.80058600  |
| H | -5.74930600 | 0.41816700  | 0.72546200  | H | 1.40032000  | 2.65300000  | 2.59100700  |
| H | -6.01586000 | 1.16464500  | -0.88930100 | C | 2.34757400  | 2.54294000  | -3.23381900 |
| C | 3.82586900  | -1.77580600 | -0.21926600 | H | 2.95380500  | 1.64763100  | -2.98830500 |
| C | 3.85469200  | -2.87168500 | -1.11993600 | C | 0.95733400  | 2.04597300  | -3.67251000 |
| C | 3.61548200  | -4.15904200 | -0.60657200 | H | 0.47466800  | 1.46331300  | -2.86420300 |
| H | 3.61417400  | -5.02309100 | -1.28842900 | H | 1.03879000  | 1.38645700  | -4.56121700 |
| C | 3.32283500  | -4.34695000 | 0.75123300  | H | 0.28804700  | 2.89130200  | -3.93827400 |
| H | 3.07967800  | -5.35040200 | 1.13208000  | C | -1.61715800 | -0.40016500 | 3.31619500  |
| C | 3.30987600  | -3.25419100 | 1.62843100  | H | -1.01189200 | -0.48800300 | 2.39260800  |
| H | 3.04490500  | -3.41552900 | 2.68331500  | H | -2.01295200 | -1.41178800 | 3.53490600  |
| C | 3.58284400  | -1.95121400 | 1.16954600  | H | -0.93471700 | -0.12069600 | 4.14606900  |
| C | 4.64834100  | -1.00907400 | 3.25767200  | C | -2.75048100 | 0.62785500  | 3.14403900  |
| H | 4.39411800  | -1.88542200 | 3.88949900  | H | -3.36570400 | 0.29373400  | 2.28443500  |
| H | 4.70737500  | -0.12282400 | 3.92429300  | C | -3.67678300 | 0.67100700  | 4.37372200  |
| H | 5.65527300  | -1.18727500 | 2.82604700  | H | -3.12306700 | 0.94558100  | 5.29614700  |
| C | 3.59157700  | -0.78913200 | 2.15750300  | H | -4.13080800 | -0.32672200 | 4.54704400  |
| H | 3.88799900  | 0.12384600  | 1.60029600  | H | -4.49713400 | 1.40731900  | 4.24260300  |
| C | 2.19910800  | -0.52486500 | 2.76037900  | C | -2.18874500 | 2.00338600  | 2.80385000  |
| H | 1.47381700  | -0.26707100 | 1.96324600  | C | -1.45505800 | 2.71344100  | 3.77325200  |
| H | 2.23964100  | 0.31916700  | 3.47937400  | H | -1.30228100 | 2.26600900  | 4.76774000  |
| H | 1.80456700  | -1.41698700 | 3.28849700  | C | -0.93152900 | 3.98242500  | 3.49434700  |
| C | 5.57372600  | -2.95483300 | -2.96413800 | H | -0.37720200 | 4.53191500  | 4.27093300  |
| H | 6.27969800  | -2.36366300 | -2.34487300 | C | -1.08379400 | 4.53454500  | 2.21692100  |
| H | 5.77951900  | -2.73141700 | -4.03254800 | H | -0.63254300 | 5.51227800  | 1.98315000  |
| H | 5.80368700  | -4.02773100 | -2.79082800 | C | -2.37640800 | 2.60530500  | 1.52605200  |
| C | 4.10502400  | -2.64791600 | -2.60550600 | C | -1.79112100 | 3.85830200  | 1.20073100  |
| H | 3.92155800  | -1.56717400 | -2.79154000 | C | -1.85358300 | 3.64639200  | -1.40103300 |
| C | 3.13155400  | -3.43767000 | -3.49646300 | H | -1.07581500 | 2.86250200  | -1.32103800 |
| H | 3.29764600  | -4.53296400 | -3.42080500 | H | -1.62054300 | 4.25849400  | -2.29674600 |
| H | 3.26837200  | -3.15793100 | -4.56210600 | H | -2.82029000 | 3.14022800  | -1.59177600 |
| H | 2.08242200  | -3.22365400 | -3.20872100 | C | -1.88417700 | 4.55217700  | -0.15907500 |
| C | 2.85026800  | 2.97569100  | -0.74638300 | H | -0.95487600 | 5.15906900  | -0.20899000 |
| C | 2.25902300  | 3.39076200  | -1.97017800 | C | -3.05902500 | 5.55239200  | -0.20456000 |
| C | 1.58972700  | 4.63001000  | -1.99203100 | H | -4.03907900 | 5.03557000  | -0.14730900 |
| H | 1.12743300  | 4.97667200  | -2.92965700 | H | -3.04147100 | 6.13329900  | -1.15079900 |
| C | 1.52055000  | 5.43659900  | -0.84645800 | H | -3.01175000 | 6.26869700  | 0.64093700  |
| H | 1.01958300  | 6.41640500  | -0.89454700 | C | -4.20635100 | -0.91034100 | -1.38292700 |
| C | 2.08856500  | 4.99840200  | 0.35852100  | C | -4.10637100 | -0.82566400 | -2.79585900 |
| H | 2.01399200  | 5.62781600  | 1.25906500  | C | -4.14820700 | -2.02464200 | -3.53178900 |
| C | 2.74712700  | 3.75624600  | 0.43548600  | H | -4.04894500 | -1.99284400 | -4.62803200 |
| C | 2.28889100  | 3.24807400  | 2.87709200  | C | -4.30718500 | -3.25895700 | -2.88617700 |
| H | 1.94027600  | 4.27087900  | 3.12776900  | H | -4.32998800 | -4.18781100 | -3.47764100 |

C -4.43602000 -3.31762400 -1.49143000  
H -4.55482300 -4.29330800 -0.99598700  
C -4.38182700 -2.14861100 -0.71085300  
C -3.55516600 -3.27884700 1.41595100  
H -3.84431100 -4.30952400 1.12263000  
H -3.57727600 -3.23220600 2.52357400  
H -2.50473300 -3.11835200 1.10051200  
C -4.49061400 -2.22240700 0.80745700  
H -4.16583200 -1.23807900 1.20535600  
C -5.95361900 -2.45348000 1.23905700  
H -6.63629700 -1.68463900 0.82089500  
H -6.04502000 -2.43502900 2.34535600  
H -6.31546300 -3.44245200 0.88601700  
C -4.86234100 0.71351100 -4.67586600  
H -4.66026000 -0.00578700 -5.49737900  
H -4.75024200 1.73340700 -5.09955800  
H -5.91977200 0.58157200 -4.36658400  
C -3.89854900 0.51337600 -3.49297100  
H -4.11398000 1.30319600 -2.74240100  
C -2.42887200 0.68823000 -3.92360700  
H -1.74791800 0.59677700 -3.05509500  
H -2.26824100 1.68578100 -4.38349200  
H -2.13608400 -0.08484700 -4.66495300  
C 3.33646200 3.26787100 1.75358300  
C 4.57449900 4.09468600 2.15336100  
H 4.29732000 5.15128700 2.35535500  
H 5.34080300 4.10268200 1.35104000  
H 5.04181200 3.68674700 3.07400600  
C 3.06809400 3.29721700 -4.36797600  
H 2.49703200 4.19355300 -4.69032400  
H 3.18830300 2.64264500 -5.25641400  
H 4.07559900 3.63846800 -4.05191800  
H 3.65471400 2.21703300 1.59605100

[AuCl( $\eta^2$ -E-2b<sup>H</sup>)]

P 0.91154900 -1.06791200 -0.58523600  
P -0.91001400 -1.06902100 0.58752800  
N 4.05497500 -1.09136700 -0.96247100  
N -4.58282600 -1.56518100 -1.15261900  
N -4.05398100 -1.08963000 0.96181800  
N 4.58565200 -1.55899700 1.15334200  
C 3.52103000 -1.31000300 0.29494600  
C 2.17918600 -1.30408100 0.65058700

H 1.93915400 -1.44328200 1.71764900  
C -3.51891300 -1.31312000 -0.29422600  
C -2.17675100 -1.30876200 -0.64862700  
H -1.93563500 -1.45177300 -1.71493700  
C -5.84879600 -1.24498700 -0.49044300  
H -6.66915500 -1.91582100 -0.81807900  
H -6.16403700 -0.18875500 -0.67049200  
C 5.85112300 -1.24186000 0.48871500  
H 6.67153000 -1.91174800 0.81816400  
H 6.16695000 -0.18507300 0.66439700  
C -5.46748000 -1.45444500 0.98961900  
H -6.05002300 -0.80578700 1.67516200  
H -5.62777700 -2.51823700 1.29270900  
C 5.46833000 -1.45688600 -0.99015400  
H 6.05050000 -0.81111700 -1.67873600  
H 5.62790300 -2.52189800 -1.28929000  
H 4.46254300 -1.33496600 2.14238100  
H 3.45116600 -1.21185000 -1.77958200  
H -3.45100300 -1.20630300 1.78007200  
H -4.45870200 -1.34529200 -2.14245500  
Au -0.00087800 1.17022500 -0.00003800  
Cl -0.00236200 3.49407100 -0.00184400

TS1-2b<sup>H</sup>

P 0.57042200 -0.42918500 1.83353700  
N 4.61244800 0.51876900 1.24673900  
N 3.43487100 -0.87413300 -0.04107900  
C 3.32663600 0.00503600 1.02192900  
C 5.47901500 0.18815100 0.11492300  
H 6.53523700 0.05332700 0.42763100  
H 5.44787800 0.96089000 -0.69294300  
C 4.83237200 -1.12381700 -0.37113200  
H 4.97680800 -1.29762600 -1.45703100  
H 5.25375800 -1.99941800 0.18177200  
C 2.20747600 0.34441800 1.75281600  
P -0.57912800 0.76899300 0.39670400  
N -4.65054100 0.66062600 0.19460200  
N -3.20547000 1.75731800 -1.08446600  
C -3.31115600 0.91508800 -0.00148800  
C -5.47571700 1.53027500 -0.64442700  
H -6.38540700 1.01211300 -1.00968200  
H -5.79140700 2.45309700 -0.10112900  
C -4.48611900 1.86763300 -1.78200600



|    |             |             |             |
|----|-------------|-------------|-------------|
| H  | -4.64654100 | 2.88305600  | -2.19744900 |
| H  | -4.56943200 | 1.13024000  | -2.61569500 |
| C  | -2.26525300 | 0.40164600  | 0.77435900  |
| H  | 2.36329800  | 1.09506900  | 2.54795200  |
| H  | -2.54902900 | -0.27120000 | 1.60262200  |
| Au | 0.22503200  | -1.59054000 | -0.26672600 |
| Cl | 0.12856000  | -3.15162100 | -1.98870200 |
| H  | 2.70343700  | -1.58029400 | -0.18684900 |
| H  | 4.66877800  | 1.45572200  | 1.65020600  |
| H  | -2.31100800 | 1.80657000  | -1.57942700 |
| H  | -4.97357400 | 0.32707600  | 1.10352900  |

[AuCl( $\eta^1$ -E-2b<sup>H</sup>)]

|    |             |             |             |
|----|-------------|-------------|-------------|
| P  | -0.19636900 | -1.01167400 | -0.05325900 |
| N  | -3.77559900 | -3.00943300 | 0.21037400  |
| N  | -3.46251300 | -0.83415900 | -0.16834300 |
| C  | -2.80701800 | -2.02601200 | 0.03748000  |
| C  | -5.09063300 | -2.48367800 | -0.16416000 |
| H  | -5.90124900 | -2.92176100 | 0.45307100  |
| H  | -5.32772300 | -2.66942900 | -1.23993900 |
| C  | -4.89136900 | -0.97673400 | 0.09918900  |
| H  | -5.50232600 | -0.33969100 | -0.57163200 |
| H  | -5.14740100 | -0.71901200 | 1.15505600  |
| C  | -1.43483200 | -2.25458900 | 0.08350700  |
| P  | 1.69893800  | -1.84574200 | 0.14564800  |
| N  | 4.99797800  | 0.58078100  | 0.04599200  |
| N  | 4.87631100  | -1.65024000 | -0.04870500 |
| C  | 4.11569400  | -0.49202000 | 0.05022800  |
| C  | 6.37129500  | 0.10469600  | 0.20684000  |
| H  | 7.09784500  | 0.73982800  | -0.34003100 |
| H  | 6.68180300  | 0.06005300  | 1.27932200  |
| C  | 6.25957000  | -1.31423800 | -0.38662000 |
| H  | 6.98200200  | -2.02340900 | 0.06691100  |
| H  | 6.43367900  | -1.29406600 | -1.49002600 |
| C  | 2.73461200  | -0.39948400 | 0.14379700  |
| H  | -1.09993100 | -3.29450300 | 0.22473200  |
| H  | 2.30404900  | 0.61374800  | 0.21862200  |
| H  | 4.70156400  | 1.45186800  | 0.48967700  |
| H  | 4.43376800  | -2.47386700 | -0.46429500 |
| H  | -2.96039500 | 0.05253900  | -0.01490000 |
| H  | -3.52920300 | -3.97235700 | -0.02482000 |
| Au | -0.74701400 | 1.19871700  | -0.02776800 |
| Cl | -1.33459400 | 3.43508200  | 0.02172200  |

TS2-2b<sup>H</sup>

|    |             |             |             |
|----|-------------|-------------|-------------|
| P  | -1.96380800 | 0.60147700  | -1.65877800 |
| P  | 0.23241600  | 0.53982600  | -1.34660200 |
| N  | -4.93063400 | 0.63109300  | -0.47476600 |
| N  | 2.25057800  | 3.65923800  | 0.45103200  |
| N  | 2.86379700  | 1.51812500  | 0.35211500  |
| N  | -4.37880400 | 0.13553400  | 1.63594600  |
| C  | -3.86323900 | 0.36946800  | 0.36700100  |
| C  | -2.51312500 | 0.34641700  | 0.01509300  |
| H  | -1.79854000 | 0.11124800  | 0.82153700  |
| C  | 1.88307800  | 2.40369300  | -0.00819900 |
| C  | 0.69443600  | 2.11786900  | -0.69387500 |
| H  | 0.02848000  | 2.96843300  | -0.91341100 |
| C  | 3.64412100  | 3.63653600  | 0.90555600  |
| H  | 3.80732600  | 4.30797700  | 1.77286000  |
| H  | 4.34989700  | 3.93452700  | 0.09319100  |
| C  | -5.83299600 | -0.02022200 | 1.55992900  |
| H  | -6.33995800 | 0.36419400  | 2.46842400  |
| H  | -6.13392400 | -1.08586500 | 1.41403500  |
| C  | 3.81714000  | 2.14461800  | 1.26614200  |
| H  | 4.85063600  | 1.78015900  | 1.09924500  |
| H  | 3.54889200  | 1.95489400  | 2.33257300  |
| C  | -6.15570500 | 0.81325800  | 0.30196800  |
| H  | -7.05037000 | 0.44068800  | -0.23750100 |
| H  | -6.32980200 | 1.88372100  | 0.57066300  |
| H  | -3.83841900 | -0.46002500 | 2.26690400  |
| H  | -4.75459800 | 1.18433100  | -1.31765100 |
| H  | 2.63125300  | 0.50988000  | 0.39064200  |
| H  | 1.87951900  | 4.48127600  | -0.02839100 |
| Au | 1.10297300  | -1.26776900 | -0.23435200 |
| Cl | 1.95934200  | -3.04817700 | 0.98996400  |

[AuCl( $\eta^1$ -Z-2b<sup>H</sup>)]

|   |             |             |             |
|---|-------------|-------------|-------------|
| P | 1.99030200  | -1.00347800 | -0.06947900 |
| P | 0.18989000  | 0.00234900  | 0.25319400  |
| N | 5.12688000  | -1.09535500 | 0.34090800  |
| N | -0.83214000 | 3.97841200  | 0.05886300  |
| N | -2.20267200 | 2.22607800  | 0.01714800  |
| N | 5.57806800  | 0.92988000  | -0.48828200 |
| C | 4.54752700  | 0.04731400  | -0.18310900 |
| C | 3.19081500  | 0.28067900  | -0.37352600 |
| H | 2.90933100  | 1.26008800  | -0.79533000 |

|    |             |             |             |
|----|-------------|-------------|-------------|
| C  | -0.88518200 | 2.59055600  | 0.09866600  |
| C  | 0.23321300  | 1.76016900  | 0.19514200  |
| H  | 1.21555300  | 2.24918900  | 0.28793300  |
| C  | -2.17653200 | 4.53445600  | 0.24077900  |
| H  | -2.31782600 | 5.46987100  | -0.33786000 |
| H  | -2.39843400 | 4.74801100  | 1.31422700  |
| C  | 6.86750800  | 0.23923300  | -0.40902200 |
| H  | 7.67865200  | 0.91275800  | -0.06445500 |
| H  | 7.17014900  | -0.20172300 | -1.38961400 |
| C  | -3.05249700 | 3.37469100  | -0.28028600 |
| H  | -4.03064900 | 3.31007100  | 0.23731300  |
| H  | -3.24374900 | 3.47635000  | -1.37545200 |
| C  | 6.54571900  | -0.87252400 | 0.61061800  |
| H  | 7.14998500  | -1.78810200 | 0.44652200  |
| H  | 6.72640500  | -0.51708400 | 1.65421600  |
| H  | 5.41665900  | 1.60624200  | -1.23679900 |
| H  | 4.55854400  | -1.68197200 | 0.95751800  |
| H  | -2.45715700 | 1.25426800  | -0.21650900 |
| H  | -0.03005100 | 4.44010000  | 0.49086700  |
| Au | -1.78842400 | -1.09953900 | 0.02878600  |
| Cl | -3.82818700 | -2.15635800 | -0.22931900 |

### TS3-2b<sup>H</sup>

|   |             |             |             |
|---|-------------|-------------|-------------|
| P | 1.89820200  | -0.73550500 | 1.26260400  |
| P | 0.06811000  | 0.30302900  | 1.72624500  |
| N | 4.94669400  | -1.07949400 | 0.46582900  |
| N | -0.78514900 | 4.07591000  | 0.26139700  |
| N | -1.99689400 | 2.20253000  | 0.07708000  |
| N | 5.14658100  | 0.85245500  | -0.60823900 |
| C | 4.27561600  | 0.06411800  | 0.11382500  |
| C | 2.94863100  | 0.39479800  | 0.42770100  |
| H | 2.57266200  | 1.36584100  | 0.05782900  |
| C | -0.80331700 | 2.71045900  | 0.54953400  |
| C | 0.21403200  | 2.00714000  | 1.17780700  |
| H | 1.10714900  | 2.57634400  | 1.48584500  |
| C | -2.12123800 | 4.50666000  | -0.16085100 |
| H | -2.07615400 | 5.32321700  | -0.91068700 |
| H | -2.74294500 | 4.85525100  | 0.69945900  |
| C | 6.35592000  | 0.10026300  | -0.95350900 |
| H | 7.26028700  | 0.74155300  | -0.94175400 |
| H | 6.27332100  | -0.37270300 | -1.96081400 |
| C | -2.68724200 | 3.19540400  | -0.74241800 |
| H | -3.78940900 | 3.12415700  | -0.64159200 |

|    |             |             |             |
|----|-------------|-------------|-------------|
| H  | -2.43018000 | 3.09570600  | -1.82454000 |
| C  | 6.37159600  | -0.97024300 | 0.16129300  |
| H  | 6.79855100  | -1.93439600 | -0.18136000 |
| H  | 6.95946300  | -0.62188800 | 1.04414100  |
| H  | 4.76430600  | 1.55404700  | -1.24436900 |
| H  | 4.57927300  | -1.66115000 | 1.22336500  |
| H  | -2.02945800 | 1.20128400  | -0.16516300 |
| H  | -0.25211100 | 4.67704000  | 0.89294200  |
| Au | -0.89954800 | -1.06793700 | 0.07394800  |
| Cl | -2.07505100 | -2.20926400 | -1.58189300 |

### [AuCl( $\eta^2$ -Z-2b<sup>H</sup>)]

|    |             |             |             |
|----|-------------|-------------|-------------|
| P  | -0.90643000 | -0.49105700 | -1.39896500 |
| P  | 1.22571400  | -0.14857300 | -1.20035100 |
| N  | -3.80833400 | -1.29397100 | -0.44432400 |
| N  | 3.85738400  | -2.14648100 | 1.21069500  |
| N  | 4.23188400  | -0.89632800 | -0.59600700 |
| N  | -3.21501900 | -3.02600400 | 0.83016600  |
| C  | -2.72366900 | -2.01465300 | 0.01856700  |
| C  | -1.38184800 | -1.77370100 | -0.25927000 |
| H  | -0.64186900 | -2.42084400 | 0.24004200  |
| C  | 3.23739700  | -1.38511000 | 0.22800500  |
| C  | 1.86795800  | -1.17429000 | 0.10961500  |
| H  | 1.22597500  | -1.61442400 | 0.89053400  |
| C  | 5.30551700  | -1.92736300 | 1.17735100  |
| H  | 5.86946400  | -2.84020000 | 1.45833700  |
| H  | 5.62054800  | -1.09678200 | 1.85403600  |
| C  | -4.66906100 | -3.12695900 | 0.69071000  |
| H  | -5.15771100 | -3.42379300 | 1.64118300  |
| H  | -4.96495200 | -3.85886900 | -0.09941900 |
| C  | 5.51118400  | -1.53377000 | -0.30044800 |
| H  | 6.36456600  | -0.83927600 | -0.44052700 |
| H  | 5.68988200  | -2.43864800 | -0.93137200 |
| C  | -5.02555200 | -1.68772100 | 0.26403900  |
| H  | -5.91979000 | -1.64766900 | -0.39085200 |
| H  | -5.21602300 | -1.04434000 | 1.15628900  |
| H  | -2.65191100 | -3.87053700 | 0.94276500  |
| H  | -3.65664300 | -0.32024000 | -0.72028000 |
| H  | 3.98219200  | -0.58682800 | -1.53839400 |
| H  | 3.38096100  | -2.24000700 | 2.10960400  |
| Au | -0.20652200 | 1.51922800  | -0.08534900 |
| Cl | -0.74068800 | 3.35875100  | 1.23442300  |

**Z-3**

P -1.06258200 -2.31570900 0.10939100  
P 1.00084800 -1.99188700 0.92139900  
N -4.02049000 -1.09485200 -0.42848600  
N 3.10013400 1.21119500 -0.79741500  
N 3.96860900 -0.23930000 0.64637700  
N -3.58825200 0.86853100 0.55194800  
C -2.99456700 -0.30036500 0.07195300  
C 4.77360200 -2.28857500 1.68654700  
C -2.96104600 1.68452700 1.53926300  
C -3.86100400 -1.98694600 -1.53261500  
C -1.66301400 -0.59473100 0.10270300  
H -1.01005400 0.20607500 0.46402500  
C 2.79666700 0.06520300 -0.05702700  
C -3.48933300 -1.48303200 -2.79788500  
C 3.99891800 -1.11005300 1.77365100  
C 1.59068000 -0.57070100 -0.08441300  
H 0.87994900 -0.13845300 -0.79771600  
C 2.29679000 1.77329300 -1.82924300  
C 4.52678900 1.48535000 -0.76795300  
H 4.72296100 2.56561100 -0.82296600  
H 5.05689300 0.98767700 -1.60229800  
C -2.75413100 3.04228800 1.22274500  
C 3.31096600 -0.76106300 2.94977800  
C -2.64737000 1.15899700 2.80730800  
C 5.71521400 -2.51120200 0.50370000  
H 6.20205200 -1.53908500 0.32500800  
C -4.19833200 -3.34242400 -1.35056500  
C 2.20934000 1.15487100 -3.09087000  
C 1.68080600 3.01814200 -1.57386800  
C -5.03371900 0.70197300 0.64690200  
H -5.56263900 1.63916900 0.42025800  
H -5.32447100 0.38333500 1.66454900  
C 4.71556700 -3.18443600 2.75674300  
H 5.28539100 -4.11294100 2.72077600  
C 3.28515600 -1.68676300 3.99757400  
H 2.73476100 -1.45023700 4.91062900  
C -3.13650100 -0.02214400 -3.03661000  
H -3.33891800 0.54378100 -2.11698000  
C 4.91131800 0.86835200 0.56566300  
H 5.95001900 0.51345800 0.59889700  
H 4.76199400 1.58703800 1.39425000  
C 3.95057900 -2.90074800 3.88828900

H 3.90717300 -3.62158200 4.70630500  
C -3.15407800 3.55319800 -0.15365300  
H -4.11918200 3.08297000 -0.39748600  
C -5.29786000 -0.39113700 -0.37685400  
H -6.11436900 -1.06632800 -0.08315900  
H -5.54006600 0.03105900 -1.37002800  
C 2.92631400 -0.14826700 -3.39719900  
H 3.25433000 -0.58069300 -2.44135200  
C -2.03521100 2.01395900 3.73162200  
H -1.76334900 1.62830300 4.71713300  
C -3.04218400 -0.24905300 3.23356000  
H -3.48401300 -0.76604200 2.37074100  
C -3.43285700 -2.37764600 -3.87140300  
H -3.13036600 -2.01242400 -4.85521200  
C -4.14740200 -4.19283600 -2.45881100  
H -4.40801000 -5.24684000 -2.33744500  
C 2.69587400 0.61780600 3.13689600  
H 2.75937500 1.15667100 2.18180200  
C -4.64538300 -3.87594200 0.00005900  
H -4.49913600 -3.06470900 0.72759300  
C 0.98360100 3.63561700 -2.61512200  
H 0.51804200 4.60823200 -2.45619000  
C 1.47766200 1.79722200 -4.09620300  
H 1.39318300 1.33056400 -5.07986000  
C 0.87503500 3.02734100 -3.86403200  
H 0.32040600 3.52286600 -4.66290600  
C -3.76187700 -3.71966900 -3.70915700  
H -3.71866700 -4.39981500 -4.56143800  
C 1.80150300 3.65096800 -0.19434400  
H 2.85612800 3.54582700 0.10978600  
C -2.17328100 3.86631100 2.18853100  
H -2.00128800 4.92151800 1.97343800  
C -3.99944200 0.59318100 -4.14315800  
H -3.77910700 1.66674400 -4.24094300  
H -5.07238400 0.47788500 -3.92882000  
H -3.79995500 0.12408900 -5.11833000  
C -1.79505400 3.34919800 3.42649000  
H -1.32520400 3.99994200 4.16616900  
C -1.64475100 0.14083300 -3.35074700  
H -1.37713600 -0.39194200 -4.27808800  
H -1.02777000 -0.25454700 -2.52978200  
H -1.38900400 1.20294700 -3.48355000  
C -3.80016300 -5.06450900 0.46372400

H -3.89610800 -5.92078500 -0.22278000  
H -4.13443000 -5.39924600 1.45710500  
H -2.74011900 -4.78110900 0.53419800  
C 4.16463700 0.10175800 -4.26683800  
H 3.87036900 0.51206600 -5.24535000  
H 4.70879600 -0.83858100 -4.44196000  
H 4.85433100 0.81990400 -3.80105000  
C -6.13408100 -4.24155500 -0.03265800  
H -6.75419100 -3.39277000 -0.35673600  
H -6.47685500 -4.56040100 0.96294300  
H -6.31692400 -5.07119600 -0.73339800  
C 3.51667200 1.40546100 4.16717200  
H 3.14000500 2.43628100 4.25001000  
H 4.58095000 1.44372600 3.89104700  
H 3.44766600 0.93827000 5.16173300  
C 6.82460200 -3.51704400 0.81059400  
H 7.35520100 -3.27243300 1.74173600  
H 7.55548000 -3.52712900 -0.01045600  
H 6.42351400 -4.53790500 0.90211000  
C -2.14977800 3.10264800 -1.22072400  
H -2.54184400 3.29358700 -2.23265800  
H -1.91062700 2.03185900 -1.13697500  
H -1.20949200 3.66149900 -1.11795800  
C 1.22070500 0.58865900 3.53123300  
H 1.06155500 0.01003300 4.45476500  
H 0.60604700 0.14054500 2.73924500  
H 0.85587400 1.61216600 3.70503600  
C 2.00116800 -1.16508500 -4.07059300  
H 1.04716200 -1.25079800 -3.53416700  
H 2.47383400 -2.15821900 -4.09697400  
H 1.77804000 -0.87649600 -5.10954800  
C 0.95516100 2.90117000 0.84257500  
H -0.11560500 3.01404000 0.62660000  
H 1.13324900 3.30928000 1.85038000  
H 1.17815100 1.82695700 0.85720900  
C -1.85427400 -1.09464100 3.69374900  
H -1.35333100 -0.64038000 4.56274800  
H -1.11171300 -1.22122700 2.89442900  
H -2.19957600 -2.09621800 3.98973100  
C 1.45782600 5.13876400 -0.17399600  
H 2.03247300 5.70757900 -0.91928100  
H 1.67269200 5.55676400 0.81971500  
H 0.38596700 5.30264800 -0.36950000

C -3.34748200 5.06650200 -0.20998600  
H -2.39245300 5.59758800 -0.07516900  
H -4.04598000 5.41934600 0.56252000  
H -3.74455100 5.35757000 -1.19301400  
C -4.11050700 -0.17823500 4.33328900  
H -4.46235700 -1.18822000 4.59072400  
H -4.97701700 0.42323700 4.02042800  
H -3.70231100 0.27959000 5.24730200  
C 5.01940600 -2.89275200 -0.80591400  
H 4.55263300 -3.88582700 -0.73012900  
H 5.75748900 -2.92616400 -1.62187100  
H 4.24207100 -2.16507600 -1.07114200  
C -0.04954300 -4.34189600 -1.35700400  
C -0.48961500 -2.91975500 -1.59782900  
H -1.32292000 -2.87734700 -2.31180900  
H 0.32708600 -2.27791300 -1.96185600  
C 0.99326100 -4.57514800 -0.53322000  
C 1.82158700 -3.41872200 -0.04020300  
H 2.27520600 -2.91558100 -0.90465000  
H 2.64077000 -3.77373300 0.60094000  
C -0.90815200 -5.40427300 -1.98318400  
H -1.93017400 -5.35332700 -1.57835800  
H -0.52515600 -6.41960300 -1.83117200  
H -0.99557800 -5.22753000 -3.06721300  
C 1.47307900 -5.93049800 -0.08878800  
H 1.48756200 -5.97527600 1.01204400  
H 2.50948500 -6.10452100 -0.42326700  
H 0.85352300 -6.75788200 -0.45156300

#### TS4

P 0.77821200 1.73020500 0.68860900  
P -1.27587400 1.34223300 0.85567600  
N 3.88260700 1.05020800 0.31555200  
N -2.82963300 -2.20477300 -0.60790800  
N -3.91851900 -0.75758200 0.68157300  
N 3.63992500 -1.12158500 0.79006100  
C 2.93981900 0.03658000 0.46092300  
C -5.25363000 1.24224800 0.24782500  
C 3.08641800 -2.29755900 1.37975400  
C 3.78512800 2.13748400 -0.61166900  
C 1.57932400 0.14958700 0.36431700  
H 1.02170500 -0.78714200 0.46449000  
C -2.71202900 -0.97575700 0.03421500

|   |             |             |             |   |             |             |             |
|---|-------------|-------------|-------------|---|-------------|-------------|-------------|
| C | 3.78169500  | 1.88080400  | -2.00004400 | C | 3.98128800  | 4.50494100  | -1.02332100 |
| C | -4.42280800 | 0.50472700  | 1.11417300  | H | 4.05662200  | 5.52866100  | -0.65003700 |
| C | -1.57235600 | -0.21429300 | 0.00384200  | C | -3.28367800 | 0.11421200  | 3.35315000  |
| H | -0.78637700 | -0.62065400 | -0.63953200 | H | -2.57688500 | -0.46355700 | 2.73721400  |
| C | -1.92260700 | -2.71525700 | -1.57907600 | C | 3.85435400  | 3.74031200  | 1.37925000  |
| C | -4.20934200 | -2.66075400 | -0.63130600 | H | 3.61235700  | 2.79562600  | 1.88693100  |
| H | -4.26711300 | -3.75379000 | -0.52901900 | C | -0.42813700 | -4.48288800 | -2.24797700 |
| H | -4.70785300 | -2.38015700 | -1.58009800 | H | 0.11388200  | -5.40455100 | -2.03519400 |
| C | 3.28927900  | -3.50975000 | 0.68352800  | C | -0.98377600 | -2.71929000 | -3.79654800 |
| C | -4.10755100 | 0.97213700  | 2.40739000  | H | -0.88108500 | -2.26528400 | -4.78468000 |
| C | 2.50966300  | -2.27390500 | 2.66318900  | C | -0.30966500 | -3.89800700 | -3.50855200 |
| C | -5.65314600 | 0.73882400  | -1.13118900 | H | 0.32051100  | -4.36543100 | -4.26716400 |
| H | -5.15099100 | -0.22373100 | -1.29993900 | C | 4.00256800  | 4.26909800  | -2.39402200 |
| C | 3.86641300  | 3.45128300  | -0.11125600 | H | 4.09520300  | 5.10255500  | -3.09226400 |
| C | -1.81762000 | -2.11486800 | -2.84650800 | C | -1.28842700 | -4.45256900 | 0.15456700  |
| C | -1.21417700 | -3.89364100 | -1.25721300 | H | -2.35113100 | -4.46516300 | 0.44801900  |
| C | 4.99672200  | -0.78562000 | 1.20433200  | C | 2.92253200  | -4.70508300 | 1.30392300  |
| H | 5.70641600  | -1.57783500 | 0.92534700  | H | 3.08313500  | -5.65524200 | 0.79384100  |
| H | 5.04431900  | -0.65108800 | 2.30151200  | C | 4.69030300  | 0.16693200  | -3.63606300 |
| C | -5.74602500 | 2.47566500  | 0.69173500  | H | 4.60602400  | -0.88345200 | -3.95261500 |
| H | -6.38869900 | 3.06574700  | 0.03431000  | H | 5.70696600  | 0.33039300  | -3.24862200 |
| C | -4.60601800 | 2.21413800  | 2.80112700  | H | 4.56728900  | 0.79057600  | -4.53397700 |
| H | -4.35613200 | 2.60830100  | 3.78624700  | C | 2.35472400  | -4.69912800 | 2.57756600  |
| C | 3.62959400  | 0.48162600  | -2.57759700 | H | 2.07169300  | -5.64083600 | 3.05124100  |
| H | 3.75640000  | -0.24887400 | -1.76606900 | C | 2.21317100  | 0.30201600  | -3.13900200 |
| C | -4.79195400 | -1.91997800 | 0.56808000  | H | 2.01451400  | 1.03858600  | -3.93425400 |
| H | -5.83501000 | -1.60890600 | 0.41959600  | H | 1.46854500  | 0.44148900  | -2.34200000 |
| H | -4.74169800 | -2.54503900 | 1.47659500  | H | 2.08154600  | -0.70621300 | -3.56090500 |
| C | -5.41627900 | 2.96349900  | 1.94997900  | C | 2.76727000  | 4.75345300  | 1.74521500  |
| H | -5.79643300 | 3.93333400  | 2.27540600  | H | 2.96512000  | 5.73899100  | 1.29491200  |
| C | 3.85253500  | -3.47158100 | -0.72744000 | H | 2.72728100  | 4.88804600  | 2.83651100  |
| H | 4.68636800  | -2.75122000 | -0.73006200 | H | 1.78493100  | 4.39884900  | 1.40306300  |
| C | 5.23506200  | 0.51985500  | 0.46762900  | C | -3.56633200 | -1.12255800 | -4.36420800 |
| H | 5.87754400  | 1.21894000  | 1.02083300  | H | -3.03879900 | -1.43381000 | -5.27868900 |
| H | 5.68924600  | 0.34575800  | -0.52597400 | H | -4.13503900 | -0.21089500 | -4.59968700 |
| C | -2.58120200 | -0.85535300 | -3.22173600 | H | -4.27880500 | -1.91894300 | -4.10215700 |
| H | -3.16048000 | -0.53012700 | -2.34613600 | C | 5.23068100  | 4.21579300  | 1.85817100  |
| C | 2.14036400  | -3.49729400 | 3.23860800  | H | 6.01985700  | 3.48879600  | 1.61675500  |
| H | 1.68556600  | -3.50200700 | 4.23169100  | H | 5.22870000  | 4.37262300  | 2.94710800  |
| C | 2.28480500  | -0.99029500 | 3.44552600  | H | 5.50205600  | 5.17013000  | 1.38028000  |
| H | 2.67815900  | -0.14884000 | 2.85925500  | C | -4.19854800 | -0.87767800 | 4.08318200  |
| C | 3.88732500  | 2.96807000  | -2.87326900 | H | -3.60798200 | -1.55297200 | 4.72030700  |
| H | 3.87923400  | 2.79087700  | -3.95051400 | H | -4.77719800 | -1.48833200 | 3.37635500  |

H -4.91419100 -0.33883200 4.72331800  
C -7.16613700 0.50138700 -1.20575400  
H -7.51297500 -0.16523900 -0.40240700  
H -7.44045000 0.05353300 -2.17247400  
H -7.71534400 1.45011500 -1.10719000  
C 2.78180900 -2.94348800 -1.68891700  
H 3.19036600 -2.82576200 -2.70533700  
H 2.38159900 -1.97272200 -1.36146800  
H 1.93999700 -3.64808400 -1.73783400  
C -2.46601400 0.92576700 4.35545600  
H -3.11081700 1.44608900 5.08040500  
H -1.83776700 1.66612300 3.83923300  
H -1.81012100 0.25420700 4.92812700  
C -1.61961000 0.28310200 -3.57521900  
H -0.92064900 0.46916400 -2.74708800  
H -2.17404900 1.21252700 -3.77708500  
H -1.02797700 0.04311700 -4.47239600  
C -0.54975800 -3.52357100 1.12716800  
H 0.51180000 -3.44703100 0.84315300  
H -0.59385200 -3.92427900 2.15106900  
H -0.97476600 -2.51156000 1.13186600  
C 0.78681200 -0.73624500 3.65128400  
H 0.34166900 -1.51576500 4.29136800  
H 0.24693400 -0.72416700 2.69270400  
H 0.62724200 0.23911700 4.13412300  
C -0.74678400 -5.87441600 0.27617000  
H -1.22591200 -6.56379400 -0.43440600  
H -0.92003900 -6.25324100 1.29351200  
H 0.34067200 -5.89525100 0.10275100  
C 4.39085500 -4.81462300 -1.21290100  
H 3.57922900 -5.54758000 -1.34074900  
H 5.12818900 -5.23832400 -0.51564200  
H 4.87497000 -4.69159700 -2.19206800  
C 3.02737600 -1.01146500 4.78583400  
H 2.89679200 -0.05160600 5.30660000  
H 4.10470800 -1.18590900 4.64754200  
H 2.64219200 -1.80391200 5.44521800  
C -5.19691500 1.67810000 -2.25133200  
H -5.60667900 2.69103000 -2.11834500  
H -5.54335700 1.30178500 -3.22566900  
H -4.10195800 1.76169100 -2.27979500  
C -0.22796300 4.32292200 -1.16429800  
C 0.48321800 3.25804800 -1.64593100

H 1.51943700 3.38569600 -1.96019600  
H 0.00297400 2.32054300 -1.92297200  
C -1.58093600 4.17449500 -0.69010500  
C -2.23988400 2.97245500 -0.78230600  
H -1.94438200 2.21692900 -1.51171400  
H -3.25352300 2.88428000 -0.38717100  
C 0.45013600 5.65910700 -0.98734000  
H 0.45455800 5.98122600 0.06562000  
H -0.07286400 6.44333400 -1.55765100  
H 1.48994200 5.61566600 -1.33537500  
C -2.19930300 5.29081000 0.11257400  
H -3.22766100 5.03781600 0.40265800  
H -2.22261400 6.23554200 -0.45219200  
H -1.62631900 5.48511900 1.03499700

**TS6**

P 0.62499900 -0.56831400 0.30947000  
N 4.59845400 0.44362500 0.00561400  
N 3.79890100 -1.33712300 1.06782300  
C 3.44940300 -0.28445400 0.23853100  
C 5.78299200 -0.17263400 0.57202500  
H 6.39205000 0.57394000 1.10332500  
H 6.41753900 -0.63340600 -0.20949900  
C 5.17969800 -1.21765900 1.52411400  
H 5.68828500 -2.19120300 1.46338100  
H 5.22310200 -0.87328800 2.57185500  
C 4.62893200 1.70288500 -0.64761200  
C 4.32706600 2.86675500 0.08703300  
C 4.39692300 4.09789400 -0.57073600  
H 4.16201100 5.01315500 -0.02300900  
C 4.75903200 4.17402500 -1.91267300  
H 4.81433600 5.14503700 -2.40747800  
C 5.03643900 3.01330200 -2.62771300  
H 5.30174400 3.07977600 -3.68530900  
C 4.96368600 1.75959200 -2.01326600  
C 3.90524100 2.80435800 1.54468300  
H 4.00216300 1.75998000 1.87619300  
C 2.43377800 3.20436600 1.69983600  
H 2.27726900 4.24701400 1.38047200  
H 2.12345800 3.12473700 2.75386100  
H 1.77066000 2.56434100 1.09789400  
C 4.80997600 3.66433500 2.43234800  
H 5.86735700 3.38195600 2.32294300

|   |             |             |             |   |             |             |             |
|---|-------------|-------------|-------------|---|-------------|-------------|-------------|
| H | 4.52908000  | 3.55039600  | 3.48975500  | N | -4.51085100 | 0.03786500  | 0.52585700  |
| H | 4.71962700  | 4.73164600  | 2.17914600  | N | -3.34396300 | 1.83322000  | 1.12906700  |
| C | 5.20695900  | 0.49714000  | -2.82121000 | C | -3.26221000 | 0.64829800  | 0.39825700  |
| H | 5.03650700  | -0.35970300 | -2.15211700 | C | -5.26472200 | 0.65286900  | 1.60614100  |
| C | 4.20050900  | 0.38245300  | -3.97018800 | H | -6.34588500 | 0.60516200  | 1.41368900  |
| H | 3.16832900  | 0.41027400  | -3.59162400 | H | -5.05961900 | 0.15983300  | 2.57634100  |
| H | 4.34118300  | -0.56264500 | -4.51524000 | C | -4.70813700 | 2.06935400  | 1.57801300  |
| H | 4.32193200  | 1.20686400  | -4.68947800 | H | -4.72410300 | 2.56378900  | 2.55960400  |
| C | 6.64786500  | 0.42490000  | -3.33457200 | H | -5.26453300 | 2.70292900  | 0.85987400  |
| H | 6.85886000  | 1.25020700  | -4.03217100 | C | -4.84766500 | -1.26520500 | 0.06389100  |
| H | 6.82068000  | -0.52027500 | -3.87096600 | C | -5.79806000 | -1.36040400 | -0.97949300 |
| H | 7.37129000  | 0.49220100  | -2.50887000 | C | -6.17559100 | -2.62906600 | -1.42286100 |
| C | 3.12110300  | -2.59138700 | 1.06698800  | H | -6.90537400 | -2.72784800 | -2.22692600 |
| C | 3.35666200  | -3.49764700 | 0.01492100  | C | -5.64446900 | -3.77707000 | -0.83634400 |
| C | 2.65428200  | -4.70780200 | 0.01895100  | H | -5.95328600 | -4.76176500 | -1.19098100 |
| H | 2.80563000  | -5.42104100 | -0.79414600 | C | -4.73306000 | -3.66777700 | 0.20505800  |
| C | 1.76443000  | -5.01269600 | 1.04356000  | H | -4.33093000 | -4.57212500 | 0.66667900  |
| H | 1.22034700  | -5.95870700 | 1.02760500  | C | -4.31589400 | -2.41558600 | 0.67492800  |
| C | 1.57549300  | -4.12148100 | 2.09817400  | C | -6.38459100 | -0.09755100 | -1.59290800 |
| H | 0.88905300  | -4.38237100 | 2.90532700  | H | -6.48738200 | 0.63524800  | -0.77813800 |
| C | 2.25128700  | -2.90028300 | 2.13122100  | C | -5.42320300 | 0.50776600  | -2.62023600 |
| C | 4.37209400  | -3.21254200 | -1.08274100 | H | -5.35085400 | -0.14391000 | -3.50502100 |
| H | 4.94567900  | -2.32222500 | -0.78642400 | H | -5.78193700 | 1.49529300  | -2.95123400 |
| C | 3.71116200  | -2.88576600 | -2.42528400 | H | -4.41297900 | 0.62524300  | -2.20166000 |
| H | 3.01827700  | -3.68437800 | -2.73286300 | C | -7.76844800 | -0.30341700 | -2.20668200 |
| H | 4.47806700  | -2.77427900 | -3.20778400 | H | -8.46223000 | -0.77913300 | -1.49845900 |
| H | 3.14573100  | -1.94484200 | -2.36576600 | H | -8.19235100 | 0.66562200  | -2.50682600 |
| C | 5.36903000  | -4.36692600 | -1.23004900 | H | -7.71995600 | -0.92893000 | -3.11074300 |
| H | 5.82941200  | -4.62560300 | -0.26529900 | C | -3.33640900 | -2.34753000 | 1.83459000  |
| H | 6.16799900  | -4.09220200 | -1.93444600 | H | -3.06733600 | -1.29366400 | 1.99570100  |
| H | 4.88018400  | -5.27101000 | -1.62282200 | C | -2.04412400 | -3.10552500 | 1.51772900  |
| C | 2.12363300  | -1.95145000 | 3.31010100  | H | -1.52971200 | -2.67542300 | 0.64559900  |
| H | 2.39367800  | -0.94915600 | 2.94200200  | H | -1.35130000 | -3.05266900 | 2.36887100  |
| C | 0.71181600  | -1.86392700 | 3.88376400  | H | -2.24324300 | -4.17050000 | 1.31720000  |
| H | 0.00126600  | -1.54132200 | 3.10979500  | C | -3.98318400 | -2.87523600 | 3.12052100  |
| H | 0.68745400  | -1.12797000 | 4.70090600  | H | -4.23911600 | -3.94183300 | 3.02412300  |
| H | 0.37598000  | -2.82632200 | 4.30107000  | H | -3.28976300 | -2.76965800 | 3.96834100  |
| C | 3.12855400  | -2.35288800 | 4.39862400  | H | -4.90848500 | -2.33040900 | 3.35939700  |
| H | 2.87763400  | -3.34650200 | 4.80177200  | C | -2.47161400 | 2.94032900  | 0.91799400  |
| H | 3.11322300  | -1.63231000 | 5.23005300  | C | -1.62311000 | 3.32606300  | 1.97713200  |
| H | 4.15345800  | -2.40602000 | 4.00367900  | C | -0.74327800 | 4.38669700  | 1.76118300  |
| C | 2.21728000  | 0.04700900  | -0.26216000 | H | -0.06973000 | 4.70486700  | 2.55707000  |
| P | -0.56530400 | 0.87756100  | -0.56765400 | C | -0.70687500 | 5.04643600  | 0.53331900  |

H 0.00060200 5.86277900 0.37663400  
C -1.58099500 4.68230400 -0.48182900  
H -1.56248500 5.22233000 -1.43108000  
C -2.49162900 3.63494200 -0.30458300  
C -1.67659200 2.58641200 3.30632000  
H -2.73990100 2.38861500 3.51653000  
C -0.97435900 1.22715000 3.22808600  
H 0.09622700 1.35423100 2.99995000  
H -1.06493400 0.69866700 4.18969100  
H -1.40019200 0.59415800 2.43702200  
C -1.12086400 3.40369700 4.47148900  
H -1.57607700 4.40328900 4.52627500  
H -1.31525600 2.88320300 5.42013700  
H -0.03033900 3.52850200 4.38697200  
C -3.48156300 3.30799000 -1.41165400  
H -4.09767200 2.45989600 -1.08153800  
C -2.78656800 2.88668700 -2.70946500  
H -2.18664100 1.97790000 -2.55871100  
H -3.53374200 2.68422600 -3.49220600  
H -2.11946000 3.68128300 -3.07814900  
C -4.42310700 4.49361600 -1.65476400  
H -3.87000100 5.36648400 -2.03424400  
H -5.18745000 4.23032200 -2.40170300  
H -4.93232800 4.79811000 -0.72840400  
C -2.19623100 0.12988700 -0.27282200  
H 2.22677500 0.89654200 -0.95393600  
H -2.35295200 -0.87508500 -0.67908500  
C -1.10965600 -1.16567500 -3.07681200  
C -0.20426600 -0.14678000 -3.09769400  
H -0.39074800 0.74220600 -3.70427800  
H 0.80506800 -0.25609000 -2.69946700  
C -0.90868600 -2.35777700 -2.26468100  
C 0.24399700 -2.57026400 -1.56938000  
H 1.15300300 -2.01116800 -1.78035600  
H 0.35537000 -3.44669900 -0.92656900  
C -2.42602700 -1.01939800 -3.79487700  
H -3.27174200 -1.12957800 -3.10002800  
H -2.54565800 -1.79476500 -4.56884100  
H -2.50749600 -0.03655900 -4.27847900  
C -2.05714300 -3.33063900 -2.13931500  
H -1.79946000 -4.15648600 -1.46305600  
H -2.31518100 -3.76106500 -3.12005200  
H -2.97293100 -2.85235500 -1.75653900

*E-3*

P 2.47629800 4.70720700 12.59221100  
P 1.52998700 2.93385700 11.62143300  
N 1.62687900 7.63130400 11.05887800  
N -1.23948500 1.20151000 12.06728500  
N 3.01940200 7.24562800 9.35545100  
N -1.12139800 1.26713600 14.28790900  
C -0.43146700 1.59174400 13.12501700  
C 3.89032600 6.52392200 8.48901500  
C -0.88420300 1.05153500 10.69491300  
C 2.57388000 6.73346100 10.57409100  
C 0.79053300 2.18969700 13.09701800  
H 1.28239800 2.30046400 14.06962500  
C 3.02271600 5.56282200 11.09341600  
H 3.72069100 5.03180700 10.44170400  
C 1.40178100 7.86511200 12.44988600  
C 3.37689900 5.57301500 7.59148300  
C 4.87515800 3.39245700 11.84987500  
C 0.13216800 7.58629400 12.98746500  
C -1.41406200 1.94415800 9.74488000  
C -0.07199300 -0.03549300 10.29603700  
C 0.17179600 -0.21303100 8.93151200  
H 0.80616700 -1.03508700 8.60025300  
C -1.19706200 1.68936300 8.38787200  
H -1.62441000 2.36253100 7.64086200  
C 2.41854600 8.44255800 13.23830400  
C 5.27893900 6.76690600 8.58630600  
C 4.10285200 3.84135100 13.05934800  
H 4.69605400 4.53192800 13.67714800  
H 3.80324700 3.00317100 13.70994600  
C 4.35367900 2.44690700 11.03935600  
C 2.08258500 8.23846100 8.85770800  
H 1.29171300 7.78700900 8.22983500  
H 2.59483800 9.00781800 8.26339200  
C 1.50632900 8.77790800 10.16365900  
H 2.09878100 9.63401600 10.53939700  
H 0.45867500 9.09805200 10.07130500  
C 1.91935200 5.14739200 7.61465200  
H 1.42222700 5.67387000 8.44245800  
C 2.14272200 8.71378600 14.58109200  
H 2.92424000 9.14238600 15.21246200  
C 3.79482000 8.77516500 12.68312100



|   |             |             |             |   |             |             |             |
|---|-------------|-------------|-------------|---|-------------|-------------|-------------|
| H | 3.78844800  | 8.58142000  | 11.60128900 | C | 5.62406600  | 5.22169200  | 6.74665900  |
| C | -2.15745300 | 3.19789800  | 10.16548000 | H | 6.30297600  | 4.72358000  | 6.05255100  |
| H | -2.05991100 | 3.27538900  | 11.25788800 | C | 4.13697200  | 10.25565900 | 12.87938600 |
| C | -0.95801000 | 6.93342300  | 12.15871200 | H | 3.37616800  | 10.90655300 | 12.42356600 |
| H | -0.50619600 | 6.65628100  | 11.19572000 | H | 5.11010700  | 10.48847200 | 12.42203400 |
| C | 4.26390400  | 4.94690300  | 6.70619700  | H | 4.20235000  | 10.51396200 | 13.94697300 |
| H | 3.88024300  | 4.21573600  | 5.99120300  | C | -3.64420000 | 3.12701700  | 9.80477200  |
| C | -2.36901800 | 0.58100500  | 14.00530800 | H | -3.77732500 | 3.08544800  | 8.71240200  |
| H | -3.17500600 | 0.94621200  | 14.65780100 | H | -4.17742400 | 4.01605900  | 10.17494100 |
| H | -2.28240400 | -0.51378000 | 14.14623000 | H | -4.12259900 | 2.23335600  | 10.23171000 |
| C | -1.50298900 | 4.44987800  | 9.57078200  | C | 6.12357500  | 4.18509000  | 11.57623500 |
| H | -0.44888000 | 4.51911200  | 9.88376200  | H | 5.86831100  | 5.25897000  | 11.53651000 |
| H | -2.03103700 | 5.35517200  | 9.90813600  | H | 6.61564100  | 3.92049300  | 10.63290500 |
| H | -1.54174300 | 4.43853300  | 8.46992400  | H | 6.85275800  | 4.06183100  | 12.39349300 |
| C | -0.40681500 | 0.62270800  | 7.97985800  | C | -1.47092700 | 5.65151400  | 12.82166200 |
| H | -0.22586400 | 0.44787500  | 6.91807500  | H | -0.66170100 | 4.91307300  | 12.94832400 |
| C | 0.47797200  | -1.01996800 | 11.31624300 | H | -2.26581800 | 5.19956600  | 12.20937400 |
| H | 0.79193000  | -0.43640700 | 12.19687700 | H | -1.90380300 | 5.85891600  | 13.81344800 |
| C | -0.50742400 | 1.20925900  | 15.57014400 | C | 1.81243300  | 3.65230800  | 7.92422100  |
| C | -0.11398800 | 7.92159200  | 14.32113500 | H | 2.24513700  | 3.03931700  | 7.11734900  |
| H | -1.10385600 | 7.73683000  | 14.74484400 | H | 0.76278600  | 3.35565100  | 8.05153300  |
| C | 0.88392500  | 8.46849300  | 15.11978700 | H | 2.33143900  | 3.41532200  | 8.86432500  |
| H | 0.68062500  | 8.70485400  | 16.16556800 | C | 7.29673900  | 7.48942600  | 9.96523900  |
| C | 5.81311300  | 7.69635900  | 9.66549600  | H | 7.52881300  | 6.43468700  | 10.17027900 |
| H | 5.24930300  | 7.44840100  | 10.58025100 | H | 7.58476100  | 8.08045600  | 10.84696700 |
| C | -0.55503500 | 2.33460500  | 16.41322000 | H | 7.92841400  | 7.82468300  | 9.12811400  |
| C | 0.13556500  | 0.02173200  | 15.97773600 | C | 0.00025000  | 2.23128300  | 17.69328400 |
| C | 6.12993000  | 6.10735400  | 7.69781900  | H | -0.03439300 | 3.09430500  | 18.36173500 |
| H | 7.20535700  | 6.27756200  | 7.74901500  | C | 0.60003800  | 1.05317300  | 18.12315700 |
| C | -2.59503300 | 0.94707000  | 12.53543000 | H | 1.02472600  | 0.99037300  | 19.12633300 |
| H | -3.05980200 | 0.13866800  | 11.95380100 | C | 0.67560400  | -0.03943400 | 17.26441900 |
| H | -3.23124400 | 1.84727300  | 12.44975000 | H | 1.17285200  | -0.95416100 | 17.59519200 |
| C | 4.86842200  | 7.87403600  | 13.30085700 | C | 5.54906900  | 9.16960400  | 9.33587700  |
| H | 4.94031700  | 8.03448900  | 14.38782900 | H | 6.06385900  | 9.45368600  | 8.40500100  |
| H | 5.85494800  | 8.08837700  | 12.86006800 | H | 5.92444300  | 9.81609900  | 10.14381000 |
| H | 4.63120600  | 6.81583100  | 13.12117700 | H | 4.47695300  | 9.37019200  | 9.21237200  |
| C | 1.19709000  | 5.49958200  | 6.31150900  | C | 4.95512800  | 1.98362200  | 9.73913200  |
| H | 1.24789000  | 6.57753600  | 6.09766400  | H | 4.23527100  | 2.12768300  | 8.91688300  |
| H | 0.13789900  | 5.20643100  | 6.36745200  | H | 5.17536800  | 0.90422700  | 9.77991800  |
| H | 1.64754200  | 4.96893700  | 5.45847300  | H | 5.87792900  | 2.50915400  | 9.46956900  |
| C | 3.05410400  | 1.79454900  | 11.42368600 | C | -1.15886800 | 3.64946200  | 15.95923100 |
| H | 3.14642300  | 1.28287100  | 12.39539900 | H | -1.48813700 | 3.51782400  | 14.91813300 |
| H | 2.75999900  | 1.03673500  | 10.68110600 | C | -2.10864700 | 7.90862700  | 11.89010700 |

H -2.60572600 8.19734400 12.82953800  
H -2.86594700 7.44623900 11.23831100  
H -1.75230300 8.82911700 11.40516700  
C 1.69777100 -1.79906100 10.82443000  
H 1.43032600 -2.51055100 10.02851700  
H 2.12470900 -2.38333400 11.65187900  
H 2.48397900 -1.13381400 10.44027400  
C -0.61841200 -2.00307600 11.74668000  
H -1.49220700 -1.48125600 12.16095000  
H -0.23935300 -2.69674400 12.51321300  
H -0.95540400 -2.59661600 10.88303800  
C 0.29280200 -1.16116500 15.03988900  
H -0.21837500 -0.91317500 14.10110000  
C -0.10712800 4.76170500 15.98022700  
H 0.32321400 4.88670300 16.98613400  
H -0.55576500 5.72071600 15.69067200  
H 0.71160900 4.55737800 15.27334100  
C -0.35018100 -2.42934500 15.60742400  
H 0.14840800 -2.74568300 16.53631600  
H -0.27164400 -3.25942300 14.88919500  
H -1.41418700 -2.27019300 15.83680400  
C 1.76756400 -1.38833700 14.69456400  
H 2.20655900 -0.48280300 14.24980400  
H 1.86913300 -2.21374200 13.97288000  
H 2.35110300 -1.64980800 15.59066600  
C -2.38092600 4.02330700 16.80344500  
H -3.13860400 3.22620100 16.78783500  
H -2.84321700 4.94620800 16.42157000  
H -2.09948300 4.19955100 17.85333500

### Z-3<sup>H</sup>

P -0.92138900 -1.01955600 -0.24934600  
P -1.24876300 1.22983500 -0.66080000  
N 1.97216900 -2.03052400 -0.89910700  
N 2.26974100 2.62661700 0.93038900  
N 1.86640100 1.50102100 -0.96682500  
N 2.88141600 -1.66643900 1.10224300  
C 1.70465600 -1.54615000 0.37968000  
C 0.52289300 -1.04705200 0.82325900  
H 0.49897200 -0.61269800 1.82575500  
C 1.25883000 2.05278000 0.15617700  
C -0.06319800 2.02155400 0.44909300  
H -0.39157500 2.45358400 1.39720800

C 3.47808500 2.72314400 0.12711700  
H 4.38674200 2.67032300 0.74200100  
H 3.51279700 3.64629800 -0.48020100  
C 3.96554500 -2.13169100 0.25832700  
H 4.63614300 -2.81911800 0.79174800  
H 4.57221400 -1.30534100 -0.15619400  
C 3.30556800 1.50483000 -0.77778400  
H 3.84842400 1.59876000 -1.72773900  
H 3.65020000 0.59380100 -0.25474700  
C 3.18405700 -2.83351300 -0.85701600  
H 3.71652200 -2.82073700 -1.81688000  
H 2.98215300 -3.88336000 -0.57783300  
H 3.04818500 -1.01430700 1.85731900  
H 1.16339200 -2.37919700 -1.40659800  
H 1.45689500 0.64205800 -1.32283900  
H 1.99774500 3.43327400 1.47899700  
C -3.62661400 -0.87459900 0.35275900  
C -2.31635100 -1.24810800 0.99428800  
H -2.30721800 -2.30258600 1.30598100  
H -2.09433200 -0.63520500 1.88282000  
C -3.85518200 0.41938800 0.04580000  
C -2.80413300 1.44301000 0.38768800  
H -2.51130100 1.37887800 1.44739200  
H -3.17347200 2.46330700 0.20765900  
C -4.53014600 -2.02956000 0.02207600  
H -3.98804500 -2.75299100 -0.60902000  
H -5.44314100 -1.73456600 -0.50636900  
H -4.82317400 -2.56525400 0.93913700  
C -5.05937600 0.95143600 -0.67987300  
H -4.73797100 1.47040600 -1.59780400  
H -5.58445800 1.69728400 -0.06176900  
H -5.77929900 0.17565500 -0.96227300

### TS4<sup>H</sup>

P -0.92990000 0.12780300 -1.17835500  
P 1.13590000 0.38576900 -1.02454600  
N -3.73222500 -0.90795500 -0.29936200  
N 4.08522700 -0.53879500 -0.61483000  
N -3.12408500 -2.95329800 0.33706800  
N 3.71427000 -2.09677300 0.92581600  
C 3.09073900 -1.15687900 0.11912200  
C -2.63712700 -1.74346700 -0.13814000  
C 1.75151600 -0.89876000 0.06252400

H 1.10622400 -1.45874000 0.74222800  
C -1.33561500 -1.43484700 -0.39670800  
H -0.58662000 -2.20569200 -0.20967000  
C -1.19830900 2.79726500 0.68114200  
C -1.57460900 1.51376600 0.97807300  
H -2.63143100 1.23778800 1.01202900  
H -0.88719300 0.79447200 1.42138500  
C 0.19249400 3.16588700 0.56867200  
C -4.50895100 -2.79910700 0.74636700  
H -4.60607700 -2.47555300 1.79917500  
H -5.08442900 -3.72363100 0.60571000  
C -4.95794200 -1.67971800 -0.19512900  
H -5.27459800 -2.10086400 -1.16650100  
H -5.78290700 -1.08548100 0.21903800  
C 5.15206100 -1.88778700 0.90561700  
H 5.70565500 -2.82866800 1.02369200  
H 5.48555000 -1.17803500 1.68466400  
C 5.33017500 -1.27192400 -0.48428000  
H 6.20491800 -0.61088000 -0.54238200  
H 5.43394300 -2.06609600 -1.24602900  
C 1.19117900 2.26238500 0.82223800  
H 1.02292200 1.37012100 1.42300500  
H 2.23676300 2.54486600 0.67975500  
C -2.24301300 3.78821800 0.23364700  
H -2.13737000 4.01941400 -0.83924500  
H -2.15790200 4.74198300 0.77588100  
H -3.25393400 3.39339400 0.39690600  
C 0.53416100 4.50529300 -0.03506500  
H 1.62086100 4.65245600 -0.07339500  
H 0.09960500 5.33297800 0.54610700  
H 0.14224200 4.59607800 -1.06118500  
H 3.25662300 -2.33393700 1.79636300  
H 3.81912900 -0.11553600 -1.49673400  
H -2.49683100 -3.51612900 0.89666800  
H -3.64801200 -0.17209700 -0.99328300

#### Z-2b<sup>H</sup>

P -1.01679900 1.60335800 -0.08183700  
P 1.01680100 1.60335700 0.08187600  
N -3.96012300 0.57419400 0.11593500  
N 3.53863500 -1.58436400 0.17246100  
N 3.96011900 0.57419300 -0.11600200  
N -3.53862800 -1.58435800 -0.17243300

C -2.94577700 -0.33597200 -0.08591400  
C -1.60608600 -0.07223600 -0.18109800  
H -0.95050300 -0.92381500 -0.36932500  
C 2.94578300 -0.33597400 0.08591000  
C 1.60609100 -0.07224600 0.18111700  
H 0.95051700 -0.92382300 0.36937600  
C 4.97866500 -1.43953000 0.30519400  
H 5.52023600 -2.27219300 -0.16259800  
H 5.29591100 -1.35610400 1.36055600  
C -4.97865700 -1.43955700 -0.30517900  
H -5.52022400 -2.27219600 0.16266300  
H -5.29591600 -1.35619700 -1.36054300  
C 5.20065900 -0.11089900 -0.42272000  
H 6.07600900 0.43370000 -0.04512800  
H 5.32965000 -0.28160400 -1.50713200  
C -5.20067700 -0.11088200 0.42264900  
H -6.07601700 0.43368100 0.04497700  
H -5.32972700 -0.28151700 1.50706400  
H -3.05416900 -2.28965800 -0.71244200  
H -3.72612000 1.46236400 0.54336200  
H 3.72610400 1.46235400 -0.54344300  
H 3.05420100 -2.28961600 0.71255600

#### TSS<sup>H</sup>

P -0.99633700 1.40407900 -0.40521600  
N -3.82769100 -1.26090300 0.81778700  
N -3.96241900 0.41159900 -0.64073200  
C -3.10422900 -0.24896100 0.21170700  
C -5.10283400 -1.42460000 0.14005800  
H -5.89491500 -1.74989200 0.82715600  
H -5.04191700 -2.14165200 -0.69885200  
C -5.32969700 -0.00549200 -0.38924100  
H -5.93984800 0.01046100 -1.30180100  
H -5.82302500 0.61718100 0.37905600  
C -1.77907800 0.05131700 0.42669200  
P 0.98666200 1.36126000 0.55932700  
N 3.86836200 -1.06059800 -1.00746100  
N 3.92917300 0.28543400 0.76057000  
C 3.12527300 -0.15716200 -0.26673700  
C 5.26479300 -0.98457600 -0.61049400  
H 5.77209700 -1.95372700 -0.70384800  
H 5.82493300 -0.23112100 -1.19357800  
C 5.12500700 -0.53158300 0.84582100

H 5.99348200 0.04379300 1.19223600  
H 4.98993000 -1.40504900 1.50956700  
C 1.82405300 0.22060500 -0.50487800  
H -1.24176800 -0.57672900 1.14146700  
H 1.33443900 -0.22281100 -1.37538800  
H 3.63043600 -1.16479300 -1.98562100  
H 3.47536400 0.64373700 1.59356800  
H -3.74348400 1.37576700 -0.86762500  
H -3.31687500 -2.07501000 1.13431400

### **E-2b<sup>H</sup>**

P -0.84609600 0.56305500 -0.06235300  
N -4.53289200 -1.15594900 0.15344900  
N -3.95892500 0.97235000 -0.12778800  
C -3.44775800 -0.30235500 0.02703300  
C -5.75508600 -0.45469200 -0.19956500  
H -6.61943700 -0.82521300 0.36719500  
H -5.98211100 -0.52042700 -1.27942200  
C -5.37731300 0.98019900 0.17625200  
H -5.92066000 1.72744400 -0.41701000  
H -5.57883100 1.16217800 1.24786300  
C -2.13188100 -0.66483900 0.05467800  
P 0.84608400 -0.56301300 0.06231200  
N 4.53288700 1.15584200 -0.15411500  
N 3.95892200 -0.97225200 0.12847000  
C 3.44775900 0.30232300 -0.02714900  
C 5.75509500 0.45483600 0.19931800  
H 6.61941500 0.82495600 -0.36775500  
H 5.98220100 0.52132800 1.27911100  
C 5.37732100 -0.98033500 -0.17546800  
H 5.92063200 -1.72710800 0.41842700  
H 5.57893600 -1.16318100 -1.24690800  
C 2.13188500 0.66479900 -0.05507700  
H -1.90987200 -1.72891100 0.16576200  
H 1.90991100 1.72879100 -0.16700600  
H 4.40305500 2.11542300 0.13929600  
H 3.36720100 -1.75259600 -0.13164400  
H -3.36723800 1.75246800 0.13307200  
H -4.40308800 -2.11534000 -0.14060800

### **TS6<sup>H</sup>**

P 0.41116500 -1.44754200 -0.27512700  
P -1.22398400 -0.67011000 0.71732400

N 3.51330000 -1.25243800 -0.67069200  
N -4.24598600 0.08874400 0.94006600  
N 4.02015000 -0.40891000 1.33111900  
N -4.91254800 -0.71181900 -1.02462100  
C -3.80575100 -0.54875500 -0.20732400  
C 2.97204400 -0.87673800 0.54351200  
C -2.52683100 -0.93497800 -0.48240400  
H -2.33821900 -1.40150400 -1.45253400  
C 1.65780800 -0.91835200 0.89355500  
H 1.38764800 -0.53746300 1.88168900  
C 1.27644700 1.55910700 -1.08102400  
C 0.65068300 0.72972700 -1.96878300  
H 1.18076000 0.37256300 -2.85580300  
H -0.42720500 0.56826100 -1.95955500  
C 0.61023900 2.03916500 0.11030200  
C 5.28376700 -0.82188800 0.73854400  
H 5.60044900 -1.82213100 1.08526200  
H 6.08792500 -0.10453300 0.94803000  
C 4.91076300 -0.86851200 -0.74646200  
H 5.04958900 0.12405600 -1.21115500  
H 5.50944600 -1.60269200 -1.30252000  
C -6.02227800 0.07509800 -0.51575000  
H -6.99136100 -0.39367700 -0.73170400  
H -6.02758100 1.10541600 -0.91637400  
C -5.69704200 0.08856100 0.97979000  
H -6.09399600 0.97683000 1.48862300  
H -6.10573800 -0.81422000 1.46918900  
C -0.73537800 1.85602300 0.30109200  
H -1.40467500 1.64128700 -0.53275800  
H -1.21088300 2.23223300 1.20918300  
C 2.73820800 1.88872600 -1.25795200  
H 3.33785700 1.56151300 -0.39371000  
H 2.88516300 2.97653400 -1.35334600  
H 3.14235800 1.41715400 -2.16517800  
C 1.45350800 2.65233700 1.20220500  
H 0.84043400 2.88797800 2.08191700  
H 1.92799700 3.58761600 0.86388000  
H 2.26583000 1.97558000 1.51415800  
H -4.75052900 -0.76682300 -2.02168800  
H -3.70857900 -0.05960500 1.78712700  
H 3.90224000 -0.50180100 2.33261500  
H 2.91180800 -1.18393900 -1.48522300

**E-3<sup>H</sup>**

P 0.75182900 0.05546300 -1.00118000  
P -0.98142100 0.61237900 0.30117300  
N 2.54043500 -2.51129500 -0.65163900  
N -3.58631300 -0.99717500 1.02716200  
N 3.74555400 -1.80415200 1.07628500  
N -4.50597800 -1.00683100 -0.99655900  
C -3.41203200 -0.55107200 -0.27162000  
C 2.71566100 -1.44640700 0.21339400  
C -2.37820200 0.18678400 -0.75507600  
H -2.40982400 0.46620300 -1.81213100  
C 2.02826700 -0.27393700 0.22816600  
H 2.25253300 0.43676100 1.02821200  
C 1.46610400 2.74369100 -0.41889200  
C 1.23438000 1.79298500 -1.56378400  
H 2.14033000 1.68026700 -2.17736500  
H 0.42865000 2.13542900 -2.23381500  
C 0.42848200 3.07224900 0.37836900  
C 4.04166500 -3.21854000 0.92887700  
H 3.42370400 -3.85286200 1.59079700  
H 5.10116700 -3.43823200 1.11691300  
C 3.64635300 -3.43939900 -0.53335700  
H 4.49063600 -3.18537600 -1.20109400  
H 3.33852900 -4.47433200 -0.73386600  
C -5.52127500 -1.51339200 -0.09012700  
H -6.10093200 -2.33138500 -0.53843800  
H -6.21984300 -0.72589100 0.24796300  
C -4.64854000 -1.98213800 1.07643000  
H -5.18317800 -1.96298800 2.03554300  
H -4.28493400 -3.01027200 0.89353000  
C -0.92438200 2.49240100 0.07005800  
H -1.23000700 2.70013100 -0.96781100

H -1.70126400 2.90917500 0.72746600  
C 2.89251900 3.18145900 -0.23238200  
H 3.54044700 2.29427300 -0.14086200  
H 3.04558200 3.81351700 0.64971100  
H 3.24222000 3.73939400 -1.11624300  
C 0.50277600 3.92884500 1.61217000  
H 0.14331200 3.35813100 2.48434300  
H -0.15755300 4.80566400 1.51532300  
H 1.51340200 4.28866500 1.83509800  
H -4.78332500 -0.46179200 -1.80243000  
H -2.75492100 -1.08954200 1.59947800  
H 3.73011200 -1.39316700 2.00069100  
H 2.09250100 -2.32440300 -1.54100000

**DMBD**

C 0.74508700 0.12718500 -0.02454300  
C -0.74509200 0.12711400 0.02465900  
C -1.42595600 1.19407300 0.46023500  
H -0.90808400 2.08321500 0.82476500  
H -2.51825500 1.19839400 0.47446500  
C 1.44050200 -1.13430300 0.41911500  
H 1.20054900 -1.97447600 -0.25085400  
H 1.11739600 -1.42581400 1.43066000  
H 2.52994000 -1.00273800 0.42355100  
C -1.44043200 -1.13435600 -0.41914100  
H -2.52988900 -1.00295500 -0.42343200  
H -1.20030500 -1.97462900 0.25064400  
H -1.11736000 -1.42572700 -1.43074800  
C 1.42587700 1.19413900 -0.46025800  
H 2.51817000 1.19844000 -0.47453800  
H 0.90792600 2.08317600 -0.82491800

## S6: References

- [1] a) A. J. Arduengo, III, F. Davidson, H. V. R. Dias, J. R. Goerlich, D. Khasnis, W. J. Marshall, T. K. Prakasha, *J. Am. Chem. Soc.* **1997**, 119, 12742-12749; b) I. C. Watson, A. Schumann, H. Yu, E. C. Davy, R. McDonald, M. J. Ferguson, C. Hering-Junghans, E. Rivard, *Chem. Eur. J.* **2019**, 25, 9678 – 9690; c) C. Hering-Junghans, P. Andreiuk, M. J. Ferguson, R. McDonald, E. Rivard, *Angew. Chem. Int. Ed.* **2017**, 56, 6272 –6275.
- [2] M. J. Frisch, G. W. Trucks, H. B. Schlegel, G. E. Scuseria, M. A. Robb, J. R. Cheeseman, G. Scalmani, V. Barone, B. Mennucci, G. A. Petersson, H. Nakatsuji, M. Caricato, X. Li, H. P. Hratchian, A. F. Izmaylov, J. Bloino, G. Zheng, J. L. Sonnenberg, M. Hada, M. Ehara, K. Toyota, R. Fukuda, J. Hasegawa, M. Ishida, T. Nakajima, Y. Honda, O. Kitao, H. Nakai, T. Vreven, J. J. A. Montgomery, J. E. Peralta, F. Ogliaro, M. Bearpark, J. J. Heyd, E. Brothers, K. N. Kudin, V. N. Staroverov, R. Kobayashi, J. Normand, K. Raghavachari, A. Rendell, J. C. Burant, S. S. Iyengar, J. Tomasi, M. Cossi, N. Rega, J. M. Millam, M. Klene, J. E. Knox, J. B. Cross, V. Bakken, C. Adamo, J. Jaramillo, R. Gomperts, R. E. Stratmann, O. Yazyev, A. J. Austin, R. Cammi, C. Pomelli, J. W. Ochterski, R. L. Martin, K. Morokuma, V. G. Zakrzewski, G. A. Voth, P. Salvador, J. J. Dannenberg, S. Dapprich, A. D. Daniels, O. Farkas, J. B. Foresman, J. V. Ortiz, J. Cioslowski, D. J. Fox, Gaussian 09, Revision C.01. Gaussian, Inc., Wallingford CT, **2009**.
- [3] A. Bondi, *J. Phys. Chem.* **1964**, 68, 441.
